# Supplementary material
Source: publisher figshare collection journal article supplement (https://acs.figshare.com/ndownloader/files/3699706)
Supplement: Supplementary file 1 [file 3699706]

## Sheet: Table S3
Table S3: Bacillus subtilis spore inner membrane fraction proteins identified in at least two replicates
					PSORTb	Phobius		BOMP	PRED-LIPO	LocateP		InterPro
UniprotKB	Gene name	UniprotKB description	Regulated by sporulation-specific sigma factor	Predicted as membrane protein?		TM	SP	Category	Lipoprotein?	LocateP Subcellular Localization Prediction	LocateP Prediction by SwissProt Classification
P37871	rpoC	DNA-directed RNA polymerase subunit beta' (RNAP subunit beta') (EC 2.7.7.6) (RNA polymerase subunit beta') (Transcriptase subunit beta')			Cytoplasmic	0	0			@Intracellular	Cytoplasmic
P37476	ftsH	ATP-dependent zinc metalloprotease FtsH (EC 3.4.24.-) (Cell division protease FtsH)		Yes	CytoplasmicMembrane	2	0			@Multi-transmembrane	Membrane	GO:0016020|GO:0016021|IPR005936|IPR011546|MF_01458|PF06480|TIGR01241
P54466	yqfA	UPF0365 protein YqfA		Yes	Cytoplasmic	2	0			@Multi-transmembrane	Membrane
P37870	rpoB	DNA-directed RNA polymerase subunit beta (RNAP subunit beta) (EC 2.7.7.6) (RNA polymerase subunit beta) (Transcriptase subunit beta)			Cytoplasmic	0	0			@Intracellular	Cytoplasmic
P37571	clpC	Negative regulator of genetic competence ClpC/MecB	sigF		Cytoplasmic	0	0			@Intracellular	Cytoplasmic
P94446	coxA	Sporulation cortex protein CoxA	sigE	Yes	Unknown	0	Y			@Lipid anchored	Extracellular	IPR019076|PF09580|PS51257
P24141	oppA	Oligopeptide-binding protein OppA (Stage 0 sporulation protein KA)		Yes	Cellwall	0	Y	1	Yes	@Lipid anchored	Extracellular	PS51257
P54598	yhcN	Lipoprotein YhcN	sigF|sigG	Yes	Unknown	0	Y		Yes	@Lipid anchored	Extracellular	IPR014247|IPR019076|TIGR02898|PF09580|PS51257
O05267	yumB	NADH dehydrogenase-like protein YumB (EC 1.6.-.-)		Yes	CytoplasmicMembrane	0	0			@Intracellular	Cytoplasmic
Q45493	rnjA	Ribonuclease J 1 (RNase J1) (EC 3.1.-.-)			Cytoplasmic	0	0			@Intracellular	Cytoplasmic
P96614	cshA	DEAD-box ATP-dependent RNA helicase CshA (EC 3.6.4.13)			Cytoplasmic	0	0			@Intracellular	Cytoplasmic
P38490	ypeB	Sporulation protein YpeB (PSPA12)	sigG	Yes	Unknown	1	0			@N-terminally anchored (No CS)	Membrane
P24327	prsA	Foldase protein PrsA (EC 5.2.1.8)		Yes	CytoplasmicMembrane	0	Y		Yes	@Lipid anchored	Extracellular	PS51257
Q9KWU4	pyc	Pyruvate carboxylase (EC 6.4.1.1) (Pyruvic carboxylase) (PYC)			Cytoplasmic	0	0			@Intracellular	Cytoplasmic
P20166	ptsG	PTS system glucose-specific EIICBA component (EII-Glc/EIII-Glc) (EIICBA-Glc) [Includes: Glucose permease IIC component (PTS system glucose-specific EIIC component); Glucose-specific phosphotransferase enzyme IIB component (EC 2.7.1.69) (PTS system glucose-specific EIIB component); Glucose-specific phosphotransferase enzyme IIA component (EC 2.7.1.-) (PTS system glucose-specific EIIA component)]		Yes	CytoplasmicMembrane	11	0			@Multi-transmembrane	Membrane	GO:0016021|GO:0016020|IPR011299|IPR003352|IPR004719|TIGR02002|PF02378|TIGR00852
P33166	tuf	Elongation factor Tu (EF-Tu) (P-40)			Cytoplasmic	0	0			@Intracellular	Cytoplasmic
O31593	yhbJ	Putative efflux system component YhbJ		Yes	CytoplasmicMembrane	1	0			@N-terminally anchored (No CS)	Membrane
P31845	spoVAF	Stage V sporulation protein AF	sigG	Yes	CytoplasmicMembrane	5	0			@Multi-transmembrane	Membrane	GO:0016021|IPR004995|PIRSF005690|PF03323
P80868	fusA	Elongation factor G (EF-G) (Vegetative protein 19) (VEG19)			Cytoplasmic	0	0			@Intracellular	Cytoplasmic
P42199	tcyA	L-cystine-binding protein TcyA		Yes	Unknown	0	Y		Yes	@Lipid anchored	Extracellular	PS51257
P71012	fruA	PTS system fructose-specific EIIABC component (EIIABC-Fru) [Includes: Fructose-specific phosphotransferase enzyme IIA component (EC 2.7.1.-) (EII-Fru) (PTS system fructose-specific EIIA component); Fructose-specific phosphotransferase enzyme IIB component (EC 2.7.1.69) (EIII-Fru) (PTS system fructose-specific EIIB component); Fructose permease IIC component (PTS system fructose-specific EIIC comp…		Yes	CytoplasmicMembrane	9	0			@Multi-transmembrane	Membrane	GO:0016021|GO:0016020|IPR004715|IPR006327|IPR003352|TIGR00848|TIGR01427|PF02378
P04969	rpsK	30S ribosomal protein S11 (BS11)			Cytoplasmic	0	0			@Intracellular	Cytoplasmic
P37945	lon1	Lon protease 1 (EC 3.4.21.53) (ATP-dependent protease La 1)			Cytoplasmic	0	0			@Intracellular	Cytoplasmic
O32047	secDF	Protein translocase subunit SecDF		Yes	CytoplasmicMembrane	11	Y			@Multi-transmembrane	Membrane	IPR005791|IPR022646|IPR005665|IPR022813|IPR022645|TIGR01129|PF07549|TIGR00966|PF02355|PR01755|MF_01464_B|TIGR00916
P21882	pdhB	Pyruvate dehydrogenase E1 component subunit beta (EC 1.2.4.1) (S complex, 36 kDa subunit)		Yes	CytoplasmicMembrane	0	0			@Intracellular	Cytoplasmic
O31501	swrC	Swarming motility protein SwrC		Yes	CytoplasmicMembrane	12	0			@Multi-transmembrane	Membrane	GO:0016020|IPR001036|PR00702|PF00873
O31762	ymfD	Bacillibactin exporter		Yes	CytoplasmicMembrane	9	Y			@Multi-transmembrane	Membrane	GO:0016021|GO:0005886|IPR011701|IPR001958|PF07690|PR01035
P54535	artP	Arginine-binding extracellular protein ArtP		Yes	Unknown	0	Y		Yes	@Lipid anchored	Extracellular	GO:0016020|IPR001320|SM00079|PS51257
P38050	pbpF	Penicillin-binding protein 1F (PBP-1F) (Penicillin-binding protein F)	sigG	Yes	CytoplasmicMembrane	1	0			@N-terminally anchored (No CS)	Membrane
O32087	yuzA	Uncharacterized membrane protein YuzA	sigG	Yes	CytoplasmicMembrane	2	0			@Multi-transmembrane	Membrane
P42919	rplB	50S ribosomal protein L2 (BL2)			Unknown	0	0			@Intracellular	Cytoplasmic
O31760	rnjB	Ribonuclease J 2 (RNase J2) (EC 3.1.-.-)			Cytoplasmic	0	0			@Intracellular	Cytoplasmic
P37474	mfd	Transcription-repair-coupling factor (TRCF) (EC 3.6.4.-)			Cytoplasmic	0	0			@Intracellular	Cytoplasmic
O07634	ylaJ	Uncharacterized lipoprotein YlaJ	sigG	Yes	Unknown	0	Y		Yes	@Lipid anchored	Extracellular	IPR014247|IPR019076|PS51257|TIGR02898|PF09580
O32076	yuaG	Uncharacterized protein YuaG		Yes	CytoplasmicMembrane	1	0			@N-terminally anchored (No CS)	Membrane
P54597	yhcM	Uncharacterized protein YhcM	sigF|sigG	Yes	CytoplasmicMembrane	1	0			@N-terminally anchored (No CS)	Membrane
P50866	clpX	ATP-dependent Clp protease ATP-binding subunit ClpX			Cytoplasmic	0	0			@Intracellular	Cytoplasmic
P40868	spoVAC	Stage V sporulation protein AC	sigG	Yes	CytoplasmicMembrane	4	0			@Multi-transmembrane	Membrane
P37814	atpF	ATP synthase subunit b (ATP synthase F(0) sector subunit b) (ATPase subunit I) (F-type ATPase subunit b) (F-ATPase subunit b)		Yes	CytoplasmicMembrane	1	0			@N-terminally anchored (No CS)	Membrane	IPR028987|G3DSA:1.20.5.620|SSF81573
O32167	metQ	Methionine-binding lipoprotein MetQ		Yes	CytoplasmicMembrane	0	Y		Yes	@Lipid anchored	Extracellular	IPR004872|PF03180|PIRSF002854|PS51257|PTHR30429:SF0
O34526	alaS	Alanine--tRNA ligase (EC 6.1.1.7) (Alanyl-tRNA synthetase) (AlaRS)			Cytoplasmic	0	0			@Intracellular	Cytoplasmic
O05241	yugS	UPF0053 protein YugS		Yes	CytoplasmicMembrane	3	0			@Multi-transmembrane(Lipid modified N-termini)	Membrane
O34806	ytfJ	Uncharacterized spore protein YtfJ	sigF		Unknown	0	0			@Intracellular	Cytoplasmic
C0SP90	ythA	Putative cytochrome bd menaquinol oxidase subunit I (EC 1.10.3.-)		Yes	CytoplasmicMembrane	9	0			@Multi-transmembrane	Membrane	GO:0016020|IPR002585|PIRSF006446|PF01654
O07611	yhfM	Uncharacterized protein YhfM	sigF	Yes	CytoplasmicMembrane	1	0			@N-terminally anchored (No CS)	Membrane
P37869	eno	Enolase (EC 4.2.1.11) (2-phospho-D-glycerate hydro-lyase) (2-phosphoglycerate dehydratase)			Cytoplasmic	0	0			@Intracellular	Cytoplasmic
P46344	yqfF	Uncharacterized protein YqfF		Yes	CytoplasmicMembrane	7	Y			@Multi-transmembrane	Membrane
P46922	opuAC	Glycine betaine-binding protein OpuAC		Yes	CytoplasmicMembrane	0	Y		Yes	@Lipid anchored	Extracellular	PS51257
O08394	cypD	Probable bifunctional P-450/NADPH-P450 reductase 1 [Includes: Cytochrome P450 102 (EC 1.14.14.1); NADPH--cytochrome P450 reductase (EC 1.6.2.4)]			Cytoplasmic	0	0			@Intracellular	Cytoplasmic
P34957	qoxA	Quinol oxidase subunit 2 (EC 1.10.3.-) (Oxidase aa(3)-600 subunit 2) (Quinol oxidase aa3-600, subunit QoxA) (Quinol oxidase polypeptide II)		Yes	CytoplasmicMembrane	2	Y		Yes	@Multi-transmembrane(Lipid modified N-termini)	Membrane	GO:0016021|GO:0016020|IPR011759|IPR012141|IPR010514|IPR006332|IPR002429|G3DSA:1.10.287.90|SSF81464|PIRSF000292|PF06481|TIGR01432|PS50857|PS50999|PS51257|PF02790
O31533	yetF	UPF0702 transmembrane protein YetF		Yes	CytoplasmicMembrane	3	0			@Multi-transmembrane	Membrane
O31774	rny	Ribonuclease Y (RNase Y) (EC 3.1.-.-)		Yes	Cytoplasmic	0	Y			@N-terminally anchored (with CS)	Membrane	GO:0016020|IPR017705|TIGR03319|MF_00335
P39668	yyxA	Uncharacterized serine protease YyxA (EC 3.4.21.-)	sigG	Yes	Unknown	1	0			@N-terminally anchored (No CS)	Membrane
P17889	infB	Translation initiation factor IF-2			Cytoplasmic	0	0			@Intracellular	Cytoplasmic
O34863	uvrA	UvrABC system protein A (UvrA protein) (Excinuclease ABC subunit A)			Cytoplasmic	0	0			@Intracellular	Cytoplasmic
P28598	groL	60 kDa chaperonin (GroEL protein) (Protein Cpn60) (Stress protein H5)			Cytoplasmic	0	0			@Intracellular	Cytoplasmic
P24139	oppC	Oligopeptide transport system permease protein OppC (Stage 0 sporulation protein KC)		Yes	CytoplasmicMembrane	6	0			@Multi-transmembrane	Membrane	GO:0016020|IPR000515|G3DSA:1.10.3720.10|PS50928|PF00528|SSF161098
P20429	rpoA	DNA-directed RNA polymerase subunit alpha (RNAP subunit alpha) (EC 2.7.7.6) (RNA polymerase subunit alpha) (Transcriptase subunit alpha)			Cytoplasmic	0	0			@Intracellular	Cytoplasmic
P05653	gyrA	DNA gyrase subunit A (EC 5.99.1.3)			Cytoplasmic	0	0			@Intracellular	Cytoplasmic
P39126	icd	Isocitrate dehydrogenase [NADP] (IDH) (EC 1.1.1.42) (IDP) (NADP(+)-specific ICDH) (Oxalosuccinate decarboxylase)			Cytoplasmic	0	0			@Intracellular	Cytoplasmic
P12310	gdh	Glucose 1-dehydrogenase (EC 1.1.1.47)	sigG		Cytoplasmic	0	Y			@Intracellular	Cytoplasmic
P34956	qoxB	Quinol oxidase subunit 1 (EC 1.10.3.-) (Oxidase aa(3)-600 subunit 1) (Quinol oxidase aa3-600, subunit QoxB) (Quinol oxidase polypeptide I)		Yes	CytoplasmicMembrane	15	0			@Multi-transmembrane	Membrane	GO:0016021|IPR000883|IPR014233|PTHR10422|PR01165|TIGR02882|PF00115
P54586	yhcB	Uncharacterized protein YhcB			Cytoplasmic	0	0			@Intracellular	Cytoplasmic
P46911	qcrA	Menaquinol-cytochrome c reductase iron-sulfur subunit (Rieske iron-sulfur protein)		Yes	CytoplasmicMembrane	1	0			@N-terminally anchored (No CS)	Membrane	GO:0042651|IPR014909|PF08802
P37809	atpD	ATP synthase subunit beta (EC 3.6.3.14) (ATP synthase F1 sector subunit beta) (F-ATPase subunit beta) (Vegetative protein 31) (VEG31)		Yes	CytoplasmicMembrane	0	0			@Intracellular	Cytoplasmic
P46912	qcrB	Menaquinol-cytochrome c reductase cytochrome b subunit		Yes	CytoplasmicMembrane	4	0			@Multi-transmembrane	Membrane	GO:0016020|GO:0016021|IPR005797|IPR023530|IPR016174|PS51002|PIRSF000032|PF13631|SSF81342
O34996	polA	DNA polymerase I (POL I) (EC 2.7.7.7)			Cytoplasmic	0	0			@Intracellular	Cytoplasmic
P39793	ponA	Penicillin-binding protein 1A/1B (PBP1) [Includes: Penicillin-insensitive transglycosylase (EC 2.4.2.-) (Peptidoglycan TGase); Penicillin-sensitive transpeptidase (EC 3.4.-.-) (DD-transpeptidase)]		Yes	CytoplasmicMembrane	0	Y			@N-terminally anchored (with CS)	Membrane
P21883	pdhC	Dihydrolipoyllysine-residue acetyltransferase component of pyruvate dehydrogenase complex (EC 2.3.1.12) (Dihydrolipoamide acetyltransferase component of pyruvate dehydrogenase complex) (E2) (S complex, 48 kDa subunit)			Cytoplasmic	0	0			@Intracellular	Cytoplasmic
P37808	atpA	ATP synthase subunit alpha (EC 3.6.3.14) (ATP synthase F1 sector subunit alpha) (F-ATPase subunit alpha) (Vegetative protein 100) (VEG100)			Cytoplasmic	0	0			@Intracellular	Cytoplasmic
P71013	sipT	Signal peptidase I T (SPase I) (EC 3.4.21.89) (Leader peptidase I)		Yes	CytoplasmicMembrane	1	0			@N-terminally anchored (No CS)	Membrane	GO:0016020|GO:0016021|IPR000223|IPR019757|IPR019758|IPR019756|TIGR02227|PS00760|PS00761|PS00501|PTHR12383|PR00727
Q99171	tepA	Translocation-enhancing protein TepA	sigG		Cytoplasmic	0	0			@Intracellular	Cytoplasmic
P16336	secY	Protein translocase subunit SecY		Yes	CytoplasmicMembrane	9	Y			@Multi-transmembrane	Membrane	GO:0016020|IPR002208|PTHR10906|PS00756|TIGR00967|PS00755|PIRSF004557|PF00344
Q01625	misCA	Membrane protein insertase MisCA (Foldase YidC 2) (Membrane integrase YidC 2) (Membrane protein YidC 2) (Stage III sporulation protein J) (SpoIIIJ)		Yes	CytoplasmicMembrane	5	Y		Yes	@Multi-transmembrane(Lipid modified N-termini)	Membrane	GO:0016021|IPR023060|IPR001708|IPR028055|MF_01811|PR00701|PTHR12428|PS51257|PR01900|TIGR03592|PF02096
O32218	bdbD	Disulfide bond formation protein D (Disulfide oxidoreductase D) (Thiol-disulfide oxidoreductase D)	sigE	Yes	CytoplasmicMembrane	1	0			@N-terminally anchored (with CS)	Membrane
P08750	dacA	D-alanyl-D-alanine carboxypeptidase DacA (CPase) (DD-carboxypeptidase) (DD-peptidase) (EC 3.4.16.4) (Penicillin-binding protein 5) (PBP-5)		Yes	CytoplasmicMembrane	0	Y			@N-terminally anchored (with CS)	Membrane
P21467	rpsE	30S ribosomal protein S5 (BS5)			Cytoplasmic	0	0			@Intracellular	Cytoplasmic
O32231	rnr	Ribonuclease R (RNase R) (EC 3.1.13.1) (VacB protein homolog)			Cytoplasmic	0	0			@Intracellular	Cytoplasmic
P35136	serA	D-3-phosphoglycerate dehydrogenase (PGDH) (EC 1.1.1.95)			Cytoplasmic	0	0			@Intracellular	Cytoplasmic
P45869	ywkB	Uncharacterized transporter YwkB		Yes	CytoplasmicMembrane	10	0			@Multi-transmembrane	Membrane	GO:0016021|IPR004776|PF03547
P54536	artQ	Arginine transport system permease protein ArtQ		Yes	CytoplasmicMembrane	3	0			@Multi-transmembrane	Membrane	GO:0016020|GO:0016021|IPR000515|IPR010065|PF00528|G3DSA:1.10.3720.10|SSF161098|PS50928|TIGR01726
Q796Q1	yitG	Uncharacterized MFS-type transporter YitG	sigG	Yes	CytoplasmicMembrane	10	0			@Multi-transmembrane	Membrane	GO:0005886|GO:0016021|IPR001958|IPR011701|PR01035|PF07690
P96672	ydeO	UPF0750 membrane protein YdeO		Yes	CytoplasmicMembrane	5	0			@Multi-transmembrane	Membrane	IPR003740|PIRSF006483|PF02588
O34507	prkC	Serine/threonine-protein kinase PrkC (Ser/Thr-protein kinase PrkC) (EC 2.7.11.1)		Yes	CytoplasmicMembrane	1	0			@Intracellular /TMH start AFTER 60	Cytoplasmic
P37810	atpG	ATP synthase gamma chain (ATP synthase F1 sector gamma subunit) (F-ATPase gamma subunit)			Unknown	0	0			@Intracellular	Cytoplasmic
P21879	guaB	Inosine-5'-monophosphate dehydrogenase (IMP dehydrogenase) (IMPD) (IMPDH) (EC 1.1.1.205) (Superoxide-inducible protein 12) (SOI12)			Cytoplasmic	0	0			@Intracellular	Cytoplasmic
P54601	yhcQ	Spore coat protein F-like protein YhcQ	sigG		Unknown	0	0			@Intracellular	Cytoplasmic
P17922	pheT	Phenylalanine--tRNA ligase beta subunit (EC 6.1.1.20) (Phenylalanyl-tRNA synthetase beta subunit) (PheRS)			Cytoplasmic	0	0			@Intracellular	Cytoplasmic
P54585	yhcA	Uncharacterized MFS-type transporter YhcA		Yes	CytoplasmicMembrane	14	0			@Multi-transmembrane	Membrane	GO:0016021|IPR004638|IPR011701|TIGR00711|PF07690
O32038	aspS	Aspartate--tRNA ligase (EC 6.1.1.12) (Aspartyl-tRNA synthetase) (AspRS)			Cytoplasmic	0	0			@Intracellular	Cytoplasmic
P23545	phoR	Alkaline phosphatase synthesis sensor protein PhoR (EC 2.7.13.3)	sigE	Yes	CytoplasmicMembrane	2	0			@Multi-transmembrane	Membrane	GO:0016020|IPR003661|SM00388|PF00512|G3DSA:1.10.287.130
P40779	ytxG	UPF0478 protein YtxG		Yes	CytoplasmicMembrane	1	0			@N-terminally anchored (No CS)	Membrane
O34470	ylbL	Uncharacterized protein YlbL		Yes	Unknown	1	0			@N-terminally anchored (No CS)	Membrane
O05248	yugP	Putative membrane protease YugP (EC 3.4.24.-)		Yes	CytoplasmicMembrane	3	Y			@Multi-transmembrane	Membrane
O54408	relA	GTP pyrophosphokinase (EC 2.7.6.5) ((p)ppGpp synthase) (ATP:GTP 3'-pyrophosphotransferase) (ppGpp synthase I)			Cytoplasmic	0	0			@Intracellular	Cytoplasmic
P09124	gapA	Glyceraldehyde-3-phosphate dehydrogenase 1 (EC 1.2.1.12) (NAD-dependent glyceraldehyde-3-phosphate dehydrogenase) (GAPDH)			Cytoplasmic	0	0			@Intracellular	Cytoplasmic
P21881	pdhA	Pyruvate dehydrogenase E1 component subunit alpha (EC 1.2.4.1) (S complex, 42 kDa subunit) (Vegetative protein 220) (VEG220)			Cytoplasmic	0	0			@Intracellular	Cytoplasmic
P40397	yhxC	Uncharacterized oxidoreductase YhxC (EC 1.-.-.-) (ORFX)	sigE		Cytoplasmic	0	0			@Intracellular	Cytoplasmic
P54616	fabI	Enoyl-[acyl-carrier-protein] reductase [NADH] FabI (ENR) (EC 1.3.1.9) (Cold shock-induced protein 15) (CSI15) (NADH-dependent enoyl-ACP reductase) (Vegetative protein 241) (VEG241)		Yes	CytoplasmicMembrane	0	0			@Intracellular	Cytoplasmic
P39772	asnS	Asparagine--tRNA ligase (EC 6.1.1.22) (Asparaginyl-tRNA synthetase) (AsnRS)			Cytoplasmic	0	0			@Intracellular	Cytoplasmic
P49941	gerKC	Spore germination protein KC	sigG	Yes	CytoplasmicMembrane	0	Y		Yes	@Lipid anchored	Extracellular	GO:0016020|IPR008844|PF05504|TIGR02887
P37527	pdxS	Pyridoxal biosynthesis lyase PdxS (EC 4.-.-.-) (Superoxide-inducible protein 7) (SOI7)			Cytoplasmic	0	0			@Intracellular	Cytoplasmic
O34521	nagP	PTS system N-acetylglucosamine-specific EIICB component (EIICB-Nag) [Includes: N-acetylglucosamine permease IIC component (PTS system N-acetylglucosamine-specific EIIC component); N-acetylglucosamine-specific phosphotransferase enzyme IIB component (EC 2.7.1.69) (PTS system N-acetylglucosamine-specific EIIB component)]		Yes	CytoplasmicMembrane	10	0			@Multi-transmembrane	Membrane	GO:0016021|GO:0019866|GO:0016020|IPR010974|IPR003352|TIGR01998|PF02378
O32050	yrbG	UPF0702 transmembrane protein YrbG		Yes	CytoplasmicMembrane	3	0			@Multi-transmembrane	Membrane
Q05873	valS	Valine--tRNA ligase (EC 6.1.1.9) (Valyl-tRNA synthetase) (ValRS)			Cytoplasmic	0	0			@Intracellular	Cytoplasmic
P20282	rpsM	30S ribosomal protein S13 (BS14)			Cytoplasmic	0	0			@Intracellular	Cytoplasmic
P12425	glnA	Glutamine synthetase (EC 6.3.1.2) (Glutamate--ammonia ligase)			Cytoplasmic	0	0			@Intracellular	Cytoplasmic
P40780	ytxH	Uncharacterized protein YtxH		Yes	Unknown	1	0			@N-terminally anchored (No CS)	Membrane
O07543	yheB	UPF0754 membrane protein YheB		Yes	CytoplasmicMembrane	2	0			@Multi-transmembrane	Membrane
P39148	glyA	Serine hydroxymethyltransferase (SHMT) (Serine methylase) (EC 2.1.2.1)			Cytoplasmic	0	0			@Intracellular	Cytoplasmic
P21464	rpsB	30S ribosomal protein S2 (BS1) (Vegetative protein 209) (VEG209)			Cytoplasmic	0	0			@Intracellular	Cytoplasmic
O32269	tuaF	Teichuronic acid biosynthesis protein TuaF	sigF	Yes	CytoplasmicMembrane	2	0			@Multi-transmembrane	Membrane	GO:0016020|IPR003856|PF02706
O06491	gatA	Glutamyl-tRNA(Gln) amidotransferase subunit A (Glu-ADT subunit A) (EC 6.3.5.7)			Cytoplasmic	0	0			@Intracellular	Cytoplasmic
P45865	clsB	Minor cardiolipin synthase ClsB		Yes	CytoplasmicMembrane	1	0			@N-terminally anchored (No CS)	Membrane
O31771	ymfM	Uncharacterized membrane protein YmfM		Yes	Unknown	1	0			@Intracellular /TMH start AFTER 60	Cytoplasmic
O31989	yolF	SPBc2 prophage-derived uncharacterized protein YolF		Yes	CytoplasmicMembrane	1	0			@N-terminally anchored (No CS)	Membrane
P45694	tkt	Transketolase (TK) (EC 2.2.1.1)			Unknown	0	0			@Intracellular	Cytoplasmic
P94507	uppP	Undecaprenyl-diphosphatase (EC 3.6.1.27) (Bacitracin resistance protein) (Undecaprenyl pyrophosphate phosphatase)		Yes	CytoplasmicMembrane	7	Y			@Multi-transmembrane	Membrane	GO:0016020|IPR003824|TIGR00753|MF_01006|PF02673
P39751	mbl	MreB-like protein (Protein mbl)	sigE		Cytoplasmic	0	0			@Intracellular	Cytoplasmic
P23129	odhA	2-oxoglutarate dehydrogenase E1 component (EC 1.2.4.2) (Alpha-ketoglutarate dehydrogenase)			Cytoplasmic	0	0			@Intracellular	Cytoplasmic
P54465	yqeZ	Uncharacterized protein YqeZ		Yes	CytoplasmicMembrane	5	Y			@Multi-transmembrane	Membrane	GO:0016021|IPR002825|PF01972
P50849	pnp	Polyribonucleotide nucleotidyltransferase (EC 2.7.7.8) (Polynucleotide phosphorylase) (PNPase) (Vegetative protein 15) (VEG15)			Cytoplasmic	0	0			@Intracellular	Cytoplasmic
P46920	opuAA	Glycine betaine transport ATP-binding protein OpuAA (EC 3.6.3.32) (Quaternary-amine-transporting ATPase)		Yes	CytoplasmicMembrane	0	0			@Intracellular	Cytoplasmic	GO:0016020|IPR005892|TIGR01186
P80244	clpP	ATP-dependent Clp protease proteolytic subunit (EC 3.4.21.92) (Caseinolytic protease) (Endopeptidase Clp) (Stress protein G7)		Yes	Cytoplasmic	1	0			@Intracellular	Cytoplasmic
O31615	yjbQ	Putative Na(+)/H(+) antiporter YjbQ		Yes	CytoplasmicMembrane	13	0			@Multi-transmembrane	Membrane	GO:0016021|IPR006153|PF00999
O30509	gatB	Aspartyl/glutamyl-tRNA(Asn/Gln) amidotransferase subunit B (Asp/Glu-ADT subunit B) (EC 6.3.5.-)			Cytoplasmic	0	0			@Intracellular	Cytoplasmic
P21465	rpsC	30S ribosomal protein S3 (BS3) (BS2)			Cytoplasmic	0	0			@Intracellular	Cytoplasmic
P28628	sipS	Signal peptidase I S (SPase I) (EC 3.4.21.89) (Leader peptidase I)		Yes	CytoplasmicMembrane	0	Y			@N-terminally anchored (No CS)	Membrane	GO:0016021|GO:0016020|IPR019758|IPR000223|IPR019757|IPR019756|PS00761|PTHR12383|PR00727|TIGR02227|PS00760|PS00501
P46921	opuAB	Glycine betaine transport system permease protein OpuAB		Yes	CytoplasmicMembrane	7	0			@Multi-transmembrane	Membrane	GO:0016020|IPR000515|G3DSA:1.10.3720.10|PF00528|SSF161098|PS50928
P55873	rplT	50S ribosomal protein L20			Cytoplasmic	0	0			@Intracellular	Cytoplasmic
P46913	qcrC	Menaquinol-cytochrome c reductase cytochrome b/c subunit		Yes	CytoplasmicMembrane	3	0			@Multi-transmembrane	Membrane	GO:0016020|GO:0016021|IPR005798|IPR012049|PF00032|PIRSF036636|SSF81648|PS51003
P54481	yqfX	Uncharacterized protein YqfX	sigG	Yes	CytoplasmicMembrane	2	0			@Multi-transmembrane	Membrane
C0H3X3	yezF	Uncharacterized membrane protein YezF		Yes	Unknown	2	0			@Multi-transmembrane	Membrane
P37570	yacI	Putative ATP:guanido phosphotransferase YacI (EC 2.7.3.-)	sigF		Cytoplasmic	0	0			@Intracellular	Cytoplasmic
P28366	secA	Protein translocase subunit SecA		Yes	Cytoplasmic	0	0			@Intracellular	Cytoplasmic	GO:0016020|IPR011116|IPR011115|IPR011130|IPR020937|G3DSA:1.10.3060.10|PF07517|G3DSA:3.90.1440.10|SM00957|PS01312|SSF81767|SM00958|PF07516|PF01043|SSF81886
P80885	pyk	Pyruvate kinase (PK) (EC 2.7.1.40) (Vegetative protein 17) (VEG17)			Cytoplasmic	0	0			@Intracellular	Cytoplasmic
P50742	yphB	Uncharacterized protein YphB	sigF	Yes	CytoplasmicMembrane	3	0			@Multi-transmembrane	Membrane	PD128584
P37465	metG	Methionine--tRNA ligase (EC 6.1.1.10) (Methionyl-tRNA synthetase) (MetRS)			Cytoplasmic	0	0			@Intracellular	Cytoplasmic
O31754	rasP	Regulator of sigma-W protease RasP (EC 3.4.24.-) (Regulating anti-sigma-W factor activity protease) (S2P endopeptidase) (Site-2 protease RseP) (S2P protease RseP) (Site-2-type intramembrane protease) (Zinc metalloprotease RasP)		Yes	CytoplasmicMembrane	4	0			@Multi-transmembrane	Membrane	GO:0016021|IPR004387|TIGR00054
O07002	yveA	Aspartate-proton symporter (L-aspartate transporter)		Yes	CytoplasmicMembrane	14	0			@Multi-transmembrane	Membrane	GO:0016020|IPR002293|PIRSF006060|PF13520|PTHR11785
P37105	ffh	Signal recognition particle protein (Fifty-four homolog)		Yes	CytoplasmicMembrane	0	0			@Intracellular	Cytoplasmic
O07581	yhdL	Probable anti-sigma-M factor YhdL		Yes	Unknown	2	0			@Multi-transmembrane	Membrane
P13242	pyrG	CTP synthase (EC 6.3.4.2) (CTP synthetase) (UTP--ammonia ligase)			Cytoplasmic	0	Y			@Intracellular	Cytoplasmic
P54487	yqgE	Uncharacterized protein YqgE		Yes	CytoplasmicMembrane	12	0			@Multi-transmembrane	Membrane	GO:0016021|IPR011701|PF07690
P40420	glcU	Glucose uptake protein GlcU	sigG	Yes	CytoplasmicMembrane	8	Y			@Multi-transmembrane	Membrane	GO:0016021|IPR004673|IPR010651|TIGR00776|PF06800
P37484	yybT	Uncharacterized protein YybT		Yes	Unknown	2	0			@Multi-transmembrane	Membrane
P37956	splB	Spore photoproduct lyase (EC 4.1.99.14)	sigG		Cytoplasmic	0	0			@Intracellular	Cytoplasmic
P37477	lysS	Lysine--tRNA ligase (EC 6.1.1.6) (Lysyl-tRNA synthetase) (LysRS)			Cytoplasmic	0	0			@Intracellular	Cytoplasmic
O34389	malS	Probable NAD-dependent malic enzyme 3 (NAD-ME 3) (EC 1.1.1.38)			Cytoplasmic	0	0			@Intracellular	Cytoplasmic
P37813	atpB	ATP synthase subunit a (ATP synthase F0 sector subunit a) (F-ATPase subunit 6)		Yes	CytoplasmicMembrane	5	0			@Multi-transmembrane	Membrane
P94391	ycgN	1-pyrroline-5-carboxylate dehydrogenase 2 (P5C dehydrogenase 2) (EC 1.2.1.88) (L-glutamate gamma-semialdehyde dehydrogenase)			Cytoplasmic	0	0			@Intracellular	Cytoplasmic
P12877	rplE	50S ribosomal protein L5 (BL6)			Cytoplasmic	0	0			@Intracellular	Cytoplasmic
P13243	fbaA	Probable fructose-bisphosphate aldolase (FBP aldolase) (FBPA) (EC 4.1.2.13) (Fructose-1,6-bisphosphate aldolase)			Cytoplasmic	0	0			@Intracellular	Cytoplasmic
O32212	nhaK	Sodium, potassium, lithium and rubidium/H(+) antiporter		Yes	CytoplasmicMembrane	11	Y			@Multi-transmembrane	Membrane	GO:0016021|IPR004705|IPR018422|IPR006153|TIGR00831|PTHR10110|PF00999
O34750	yfmL	Putative ATP-dependent RNA helicase YfmL (EC 3.6.4.13)			Cytoplasmic	0	0			@Intracellular	Cytoplasmic
O32128	yutC	Uncharacterized lipoprotein YutC		Yes	Unknown	0	Y		Yes	@Lipid anchored	Extracellular	IPR019076|PS51257|PF09580
O31742	rplS	50S ribosomal protein L19			Cytoplasmic	0	0			@Intracellular	Cytoplasmic
P06224	sigA	RNA polymerase sigma factor SigA (Sigma-43) (Sigma-A)			Cytoplasmic	0	0			@Intracellular	Cytoplasmic
P24136	oppD	Oligopeptide transport ATP-binding protein OppD (Stage 0 sporulation protein KD)		Yes	CytoplasmicMembrane	0	0			@Intracellular	Cytoplasmic	GO:0016020|IPR010066|TIGR01727
P39814	topA	DNA topoisomerase 1 (EC 5.99.1.2) (DNA topoisomerase I) (Omega-protein) (Relaxing enzyme) (Swivelase) (Untwisting enzyme)			Cytoplasmic	0	0			@Intracellular	Cytoplasmic
P14577	rplP	50S ribosomal protein L16			Cytoplasmic	0	0			@Intracellular	Cytoplasmic
P42921	rplD	50S ribosomal protein L4			Unknown	0	0			@Intracellular	Cytoplasmic
Q01465	mreB	Rod shape-determining protein MreB			Cytoplasmic	0	0			@Intracellular	Cytoplasmic
C0SP98	ykfD	Putative oligopeptide transport ATP-binding protein YkfD (EC 3.6.3.-)		Yes	CytoplasmicMembrane	0	0			@Intracellular	Cytoplasmic	GO:0016020|IPR010066|TIGR01727
O34784	yobI	Uncharacterized membrane protein YobI		Yes	Cytoplasmic	2	0			@Multi-transmembrane	Membrane
O34505	ythB	Putative cytochrome bd menaquinol oxidase subunit II		Yes	CytoplasmicMembrane	9	0			@Multi-transmembrane	Membrane	GO:0016020|IPR003317|PF02322
P94464	rsmB	Ribosomal RNA small subunit methyltransferase B (EC 2.1.1.-) (rRNA (cytosine-C(5)-)-methyltransferase RsmB)			Cytoplasmic	0	0			@Intracellular	Cytoplasmic
P18157	glpK	Glycerol kinase (EC 2.7.1.30) (ATP:glycerol 3-phosphotransferase) (Glycerokinase) (GK)			Cytoplasmic	0	0			@Intracellular	Cytoplasmic
P54394	dinG	Probable ATP-dependent helicase DinG homolog (EC 3.6.4.12)			Cytoplasmic	0	0			@Intracellular	Cytoplasmic
O06012	adhB	Uncharacterized zinc-type alcohol dehydrogenase-like protein AdhB (EC 1.-.-.-)	sigG		Cytoplasmic	0	0			@Intracellular	Cytoplasmic
P21469	rpsG	30S ribosomal protein S7 (BS7)			Cytoplasmic	0	0			@Intracellular	Cytoplasmic
P24138	oppB	Oligopeptide transport system permease protein OppB (Stage 0 sporulation protein KB)		Yes	CytoplasmicMembrane	6	0			@Multi-transmembrane	Membrane	GO:0016020|IPR000515|SSF161098|PF00528|PS50928|G3DSA:1.10.3720.10
P18158	glpD	Aerobic glycerol-3-phosphate dehydrogenase (EC 1.1.5.3)			Cytoplasmic	0	0			@Intracellular	Cytoplasmic
P14193	prs	Ribose-phosphate pyrophosphokinase (RPPK) (EC 2.7.6.1) (Phosphoribosyl pyrophosphate synthase) (P-Rib-PP synthase) (PRPP synthase)			Cytoplasmic	0	0			@Intracellular	Cytoplasmic
O34454	ykaA	UPF0111 protein YkaA			Cytoplasmic	0	0			@Intracellular	Cytoplasmic
P36949	rbsB	D-ribose-binding protein		Yes	Unknown	0	Y		Yes	@Lipid anchored	Extracellular	PS51257
P39569	gerBA	Spore germination protein B1	sigG	Yes	CytoplasmicMembrane	4	0			@Multi-transmembrane	Membrane	GO:0016021|IPR004995|PF03323|PIRSF005690
C0H461	yrzQ	Uncharacterized protein YrzQ		Yes	CytoplasmicMembrane	0	Y			@Intracellular	Cytoplasmic
P19669	tal	Transaldolase (EC 2.2.1.2) (20 kDa phosphoprotein OrfU) (CSI9)			Cytoplasmic	0	0			@Intracellular	Cytoplasmic
P37877	ackA	Acetate kinase (EC 2.7.2.1) (Acetokinase)			Cytoplasmic	0	0			@Intracellular	Cytoplasmic
O32052	yrbF	UPF0092 membrane protein YrbF		Yes	CytoplasmicMembrane	1	0			@N-terminally anchored (No CS)	Membrane
P54492	yqgO	Uncharacterized protein YqgO		Yes	CytoplasmicMembrane	0	Y			@N-terminally anchored (No CS)	Membrane
O34424	yteJ	Uncharacterized membrane protein YteJ		Yes	CytoplasmicMembrane	2	0			@Multi-transmembrane	Membrane
P24469	cccA	Cytochrome c-550 (Cytochrome c A)		Yes	CytoplasmicMembrane	1	0			@N-terminally anchored (No CS)	Membrane	GO:0016021|IPR012218|PIRSF000025
O34894	ezrA	Septation ring formation regulator EzrA		Yes	CytoplasmicMembrane	0	Y			@N-terminally anchored (No CS)	Membrane	GO:0016021|IPR010379|PF06160|MF_00728
O07516	yhaH	Uncharacterized membrane protein YhaH		Yes	Unknown	1	0			@N-terminally anchored (No CS)	Membrane
P18255	thrS	Threonine--tRNA ligase 1 (EC 6.1.1.3) (Threonyl-tRNA synthetase 1) (ThrRS 1)			Cytoplasmic	0	0			@Intracellular	Cytoplasmic
O34659	ybbR	YbbR-like domain-containing protein YbbR		Yes	Unknown	0	Y			@N-terminally anchored (No CS)	Membrane
Q45614	yycG	Sensor histidine kinase YycG (EC 2.7.13.3)		Yes	CytoplasmicMembrane	2	0			@Multi-transmembrane	Membrane	GO:0016020|GO:0016021|IPR003661|IPR003660|PF00512|PF00672|PS50885|SM00388|SM00304|G3DSA:1.10.287.130
P19582	hom	Homoserine dehydrogenase (HDH) (EC 1.1.1.3)			Cytoplasmic	0	Y			@Intracellular	Cytoplasmic
P42923	rplJ	50S ribosomal protein L10 (BL5) (Cold acclimatization protein) (CAP) (Vegetative protein 300) (VEG300)			Cytoplasmic	0	0			@Intracellular	Cytoplasmic
P23966	menB	1,4-Dihydroxy-2-naphthoyl-CoA synthase (DHNA-CoA synthase) (EC 4.1.3.36)			Cytoplasmic	0	0			@Intracellular	Cytoplasmic
Q795R8	ytfP	Uncharacterized protein YtfP			Cytoplasmic	0	0			@Intracellular	Cytoplasmic
P46919	gpsA	Glycerol-3-phosphate dehydrogenase [NAD(P)+] (EC 1.1.1.94) (NAD(P)H-dependent dihydroxyacetone-phosphate reductase) (NAD(P)H-dependent glycerol-3-phosphate dehydrogenase)		Yes	Unknown	0	Y			@N-terminally anchored (No CS)	Membrane
Q06797	rplA	50S ribosomal protein L1 (BL1)			Cytoplasmic	0	0			@Intracellular	Cytoplasmic
O34442	mgtE	Magnesium transporter MgtE		Yes	CytoplasmicMembrane	5	0			@Multi-transmembrane	Membrane	GO:0016020|IPR006669|IPR006667|TIGR00400|G3DSA:1.10.357.20|PF01769
P31102	aroB	3-dehydroquinate synthase (EC 4.2.3.4)			Cytoplasmic	0	0			@Intracellular	Cytoplasmic
P37942	bfmBB	Lipoamide acyltransferase component of branched-chain alpha-keto acid dehydrogenase complex (EC 2.3.1.168) (Branched-chain alpha-keto acid dehydrogenase complex component E2) (BCKAD-E2) (BCKADE2) (Dihydrolipoamide acetyltransferase component of branched-chain alpha-keto acid dehydrogenase complex) (Dihydrolipoamide branched chain transacylase) (Dihydrolipoyllysine-residue (2-methylpropanoyl)trans…			Cytoplasmic	0	0			@Intracellular	Cytoplasmic
O05239	yugJ	Probable NADH-dependent butanol dehydrogenase 1 (EC 1.1.1.-)			Cytoplasmic	0	0			@Intracellular	Cytoplasmic
P39778	clpY	ATP-dependent protease ATPase subunit ClpY			Cytoplasmic	0	0			@Intracellular	Cytoplasmic
P49939	gerKA	Spore germination protein KA	sigG	Yes	CytoplasmicMembrane	5	0			@Multi-transmembrane	Membrane	GO:0016021|IPR004995|PF03323|PIRSF005690
O32225	yvaC	Uncharacterized membrane protein YvaC		Yes	CytoplasmicMembrane	11	0			@Multi-transmembrane	Membrane
O34987	pbuG	Guanine/hypoxanthine permease PbuG		Yes	CytoplasmicMembrane	13	0			@Multi-transmembrane	Membrane	GO:0016020|IPR006043|PF00860|PTHR11119
O32086	yubA	UPF0118 membrane protein YubA		Yes	CytoplasmicMembrane	8	0			@Multi-transmembrane	Membrane
O07637	glsA2	Glutaminase 2 (EC 3.5.1.2)			Cytoplasmic	0	0			@Intracellular	Cytoplasmic
P55342	yllA	UPF0747 protein YllA			Unknown	0	0			@Intracellular	Cytoplasmic
O07631	typA	GTP-binding protein TypA/BipA homolog		Yes	CytoplasmicMembrane	0	0			@Intracellular	Cytoplasmic
O34876	ftsX	Cell division protein FtsX		Yes	CytoplasmicMembrane	4	0			@Multi-transmembrane	Membrane	GO:0016020|GO:0016021|IPR003838|IPR004513|PF02687|PIRSF003097
O35028	yfkR	Putative spore germination protein YfkR	sigG	Yes	CytoplasmicMembrane	0	Y		Yes	@Lipid anchored	Extracellular	GO:0016020|IPR008844|TIGR02887|PF05504|PS51257
P21466	rpsD	30S ribosomal protein S4 (BS4)			Cytoplasmic	0	0			@Intracellular	Cytoplasmic
P46322	pgsA	CDP-diacylglycerol--glycerol-3-phosphate 3-phosphatidyltransferase (EC 2.7.8.5) (Phosphatidylglycerophosphate synthase) (PGP synthase)		Yes	CytoplasmicMembrane	5	0			@Multi-transmembrane	Membrane	GO:0016021|GO:0016020|IPR004570|IPR000462|TIGR00560|PF01066|PS00379|PIRSF000847
O34594	cccB	Cytochrome c-551 (Cytochrome c B) (Cytochrome c551)		Yes	CytoplasmicMembrane	0	Y		Yes	@Lipid anchored	Extracellular	GO:0016021|IPR012218|PIRSF000025|PS51257
P37585	murG	UDP-N-acetylglucosamine--N-acetylmuramyl-(pentapeptide) pyrophosphoryl-undecaprenol N-acetylglucosamine transferase (EC 2.4.1.227) (Undecaprenyl-PP-MurNAc-pentapeptide-UDPGlcNAc GlcNAc transferase)	sigE	Yes	CytoplasmicMembrane	0	0			@Intracellular	Cytoplasmic
P54510	yqhL	Uncharacterized protein YqhL		Yes	Cytoplasmic	1	0			@N-terminally anchored (No CS)	Membrane
O34859	ku	Non-homologous end joining protein Ku	sigG		Cytoplasmic	0	0			@Intracellular	Cytoplasmic
P39779	codY	GTP-sensing transcriptional pleiotropic repressor CodY (Vegetative protein 286B) (VEG286B)			Cytoplasmic	0	0			@Intracellular	Cytoplasmic
P12047	purB	Adenylosuccinate lyase (ASL) (EC 4.3.2.2) (Adenylosuccinase) (ASase) (Glutamyl--tRNA ligase regulatory factor)			Cytoplasmic	0	0			@Intracellular	Cytoplasmic
P13485	tagF	CDP-glycerol:poly(glycerophosphate) glycerophosphotransferase (EC 2.7.8.12) (CGPTase) (Major teichoic acid biosynthesis protein F) (Polyglycerol phosphate polymerase)		Yes	CytoplasmicMembrane	0	0			@Intracellular	Cytoplasmic	GO:0016020|IPR007554|PF04464
P24011	ctaC	Cytochrome c oxidase subunit 2 (EC 1.9.3.1) (Caa-3605 subunit 2) (Cytochrome aa3 subunit 2) (Cytochrome c oxidase polypeptide II) (Oxidase aa(3) subunit 2)		Yes	CytoplasmicMembrane	2	Y		Yes	@Multi-transmembrane(Lipid modified N-termini)	Membrane	GO:0016021|GO:0016020|IPR011759|IPR014222|IPR002429|PS50999|PF02790|TIGR02866|PS50857|G3DSA:1.10.287.90|PS51257|PF00116|SSF81464
P71070	yukC	Uncharacterized protein YukC		Yes	CytoplasmicMembrane	1	0			@Intracellular /TMH start AFTER 60	Cytoplasmic
O34580	pcrA	ATP-dependent DNA helicase PcrA (EC 3.6.4.12)			Cytoplasmic	0	0			@Intracellular	Cytoplasmic
O34934	ppnK2	Probable inorganic polyphosphate/ATP-NAD kinase 2 (Poly(P)/ATP NAD kinase 2) (EC 2.7.1.23)			Cytoplasmic	0	0			@Intracellular	Cytoplasmic
Q45477	ileS	Isoleucine--tRNA ligase (EC 6.1.1.5) (Isoleucyl-tRNA synthetase) (IleRS)			Cytoplasmic	0	0			@Intracellular	Cytoplasmic
P22326	tyrS1	Tyrosine--tRNA ligase 1 (EC 6.1.1.1) (Tyrosyl-tRNA synthetase 1) (TyrRS 1)			Cytoplasmic	0	0			@Intracellular	Cytoplasmic
P96583	topB	DNA topoisomerase 3 (EC 5.99.1.2) (DNA topoisomerase III)			Cytoplasmic	0	0			@Intracellular	Cytoplasmic
O31581	yfhM	AB hydrolase superfamily protein YfhM (EC 3.-.-.-)			Cytoplasmic	0	0			@Intracellular	Cytoplasmic
O34666	ctpA	Carboxy-terminal processing protease CtpA (C-terminal processing protease) (EC 3.4.21.102)		Yes	CytoplasmicMembrane	0	Y			@N-terminally anchored (with CS)	Membrane
P11998	ribH	6,7-dimethyl-8-ribityllumazine synthase (DMRL synthase) (LS) (Lumazine synthase) (EC 2.5.1.78) (Heavy riboflavin synthase beta subunit) (HRS beta subunit)			Cytoplasmic	0	0			@Intracellular	Cytoplasmic
Q03222	rho	Transcription termination factor Rho (EC 3.6.4.-) (ATP-dependent helicase Rho)			Cytoplasmic	0	0			@Intracellular	Cytoplasmic
O31716	ykpA	Uncharacterized ABC transporter ATP-binding protein YkpA			Cytoplasmic	0	0			@Intracellular	Cytoplasmic
P42182	era	GTPase Era (Bex protein)		Yes	CytoplasmicMembrane	0	0			@Intracellular	Cytoplasmic
O31816	yndM	Uncharacterized membrane protein YndM		Yes	CytoplasmicMembrane	4	0	1		@Multi-transmembrane	Membrane
O34752	lgt	Prolipoprotein diacylglyceryl transferase (EC 2.4.99.-) (Spore germination protein GerF)		Yes	CytoplasmicMembrane	7	0			@Multi-transmembrane	Membrane	GO:0016020|IPR001640|MF_01147|PF01790|PS01311|TIGR00544
O05250	malK	Sensor histidine kinase MalK (EC 2.7.13.3) (Malate kinase sensor)		Yes	CytoplasmicMembrane	2	0			@Multi-transmembrane	Membrane	GO:0016020|IPR003661|G3DSA:1.10.287.130
O05252	yufN	Uncharacterized lipoprotein YufN		Yes	Unknown	0	Y		Yes	@Lipid anchored	Extracellular	GO:0005886|IPR003760|PS51257|PF02608
O32107	yuiD	Uncharacterized membrane protein YuiD		Yes	CytoplasmicMembrane	1	Y			@Multi-transmembrane	Membrane
P36430	leuS	Leucine--tRNA ligase (EC 6.1.1.4) (Leucyl-tRNA synthetase) (LeuRS)			Cytoplasmic	0	0			@Intracellular	Cytoplasmic
P54587	yhcC	Uncharacterized protein YhcC		Yes	CytoplasmicMembrane	0	Y			@Secretory(released) (with CS)	Extracellular
O31636	yjcN	Uncharacterized protein YjcN		Yes	Unknown	0	Y			@N-terminally anchored (with CS)	Membrane
P45708	yneF	UPF0154 protein YneF		Yes	CytoplasmicMembrane	1	0			@N-terminally anchored (No CS)	Membrane	IPR005359|PD048972
P40866	spoVAA	Stage V sporulation protein AA	sigG	Yes	CytoplasmicMembrane	2	0			@Multi-transmembrane	Membrane
O34717	fadH	Probable 2,4-dienoyl-CoA reductase (EC 1.3.1.34)			Cytoplasmic	0	0			@Intracellular	Cytoplasmic
P71018	plsX	Phosphate acyltransferase (EC 2.3.1.n2) (Acyl-ACP phosphotransacylase) (Acyl-[acyl-carrier-protein]--phosphate acyltransferase) (Phosphate-acyl-ACP acyltransferase)			Cytoplasmic	0	0			@Intracellular	Cytoplasmic
O34840	chaA	Ca(2+)/H(+) antiporter ChaA	sigG	Yes	CytoplasmicMembrane	10	Y			@Multi-transmembrane	Membrane	GO:0016021|IPR004713|IPR004837|TIGR00846|PF01699
P28619	rph	Ribonuclease PH (RNase PH) (EC 2.7.7.56) (tRNA nucleotidyltransferase)			Cytoplasmic	0	0			@Intracellular	Cytoplasmic
O32031	yrrS	Uncharacterized membrane protein YrrS	sigE|sigF	Yes	Unknown	1	0			@N-terminally anchored (No CS)	Membrane
O34418	yfkI	Uncharacterized protein YfkI		Yes	Unknown	1	0			@Secretory(released) (with CS)	Extracellular
P94360	msmX	Maltodextrin import ATP-binding protein MsmX (EC 3.6.3.-)		Yes	CytoplasmicMembrane	0	0			@Intracellular	Cytoplasmic
O34341	yebC	Uncharacterized protein YebC		Yes	CytoplasmicMembrane	5	0			@Multi-transmembrane	Membrane	PD113106
P21472	rpsL	30S ribosomal protein S12 (BS12)			Cytoplasmic	0	0			@Intracellular	Cytoplasmic
O31755	proS	Proline--tRNA ligase (EC 6.1.1.15) (Prolyl-tRNA synthetase) (ProRS)			Cytoplasmic	0	0			@Intracellular	Cytoplasmic
O32241	sdpI	Immunity protein SdpI		Yes	CytoplasmicMembrane	6	0			@Multi-transmembrane	Membrane
P37566	yacD	Putative peptidyl-prolyl cis-trans isomerase YacD (PPIase YacD) (EC 5.2.1.8) (Rotamase YacD)		Yes	CytoplasmicMembrane	0	Y			@N-terminally anchored (with CS)	Membrane
Q99027	comP	Sensor histidine kinase ComP (EC 2.7.13.3)		Yes	CytoplasmicMembrane	10	0			@Multi-transmembrane	Membrane	GO:0016021|IPR011712|PF07730
O32233	secG	Probable protein-export membrane protein SecG		Yes	CytoplasmicMembrane	1	Y			@Multi-transmembrane	Membrane	GO:0016021|IPR004692|PF03840|PR01651|TIGR00810
P54419	metK	S-adenosylmethionine synthase (AdoMet synthase) (EC 2.5.1.6) (MAT) (Methionine adenosyltransferase)			Cytoplasmic	0	0			@Intracellular	Cytoplasmic
P71079	fabL	Enoyl-[acyl-carrier-protein] reductase [NADPH] FabL (ENR) (EC 1.3.1.104) (Enoyl-acyl carrier protein reductase III) (NADPH-dependent enoyl-ACP reductase)	sigG		Cytoplasmic	0	0			@Intracellular	Cytoplasmic
P13484	tagE	Probable poly(glycerol-phosphate) alpha-glucosyltransferase (EC 2.4.1.52) (Major teichoic acid biosynthesis protein E)			Unknown	0	0			@Intracellular	Cytoplasmic
P94521	ysdC	Putative aminopeptidase YsdC (EC 3.4.11.-)			Cytoplasmic	0	0			@Intracellular	Cytoplasmic
P35164	resE	Sensor histidine kinase ResE (EC 2.7.13.3)		Yes	CytoplasmicMembrane	2	0			@Multi-transmembrane	Membrane	GO:0016020|GO:0016021|IPR003661|IPR003660|SM00388|PF00672|SM00304|G3DSA:1.10.287.130|PS50885|PF00512
C0SP94	yhfQ	Putative ABC transporter substrate-binding lipoprotein YhfQ		Yes	CytoplasmicMembrane	0	Y			@Lipid anchored	Extracellular	PS51257
P54157	bcsA	Putative chalcone synthase (EC 2.3.1.74) (Naringenin-chalcone synthase)		Yes	CytoplasmicMembrane	0	0			@Intracellular	Cytoplasmic
P50739	sleB	Spore cortex-lytic enzyme (SCLE)	sigG	Yes	Extracellular	0	Y			@N-terminally anchored (No CS)	Membrane
P80866	yurY	Vegetative protein 296 (VEG296)			Cytoplasmic	0	0			@Intracellular	Cytoplasmic
O06965	yvcA	Putative lipoprotein YvcA		Yes	Unknown	0	Y		Yes	@Lipid anchored	Extracellular	PS51257
O34966	znuA	High-affinity zinc uptake system binding-protein ZnuA		Yes	CytoplasmicMembrane	0	Y		Yes	@Lipid anchored	Extracellular	IPR006128|PR00690|PS51257
C0H3X7	mprF	Phosphatidylglycerol lysyltransferase (EC 2.3.2.3) (Lysylphosphatidylglycerol synthase) (LPG synthase)		Yes	CytoplasmicMembrane	15	0			@Multi-transmembrane	Membrane
O34529	pfkA	6-phosphofructokinase (Phosphofructokinase) (EC 2.7.1.11) (Phosphohexokinase)			Cytoplasmic	0	0			@Intracellular	Cytoplasmic
Q45498	yktB	UPF0637 protein YktB			Cytoplasmic	0	0			@Intracellular	Cytoplasmic
P37489	yybO	Uncharacterized transporter YybO		Yes	CytoplasmicMembrane	12	0			@Multi-transmembrane	Membrane	GO:0016021|IPR011701|PF07690
P24137	oppF	Oligopeptide transport ATP-binding protein OppF (Stage 0 sporulation protein KE)		Yes	CytoplasmicMembrane	0	0			@Intracellular	Cytoplasmic
P54530	yqiS	Probable phosphate butyryltransferase (EC 2.3.1.19) (Phosphotransbutyrylase)			Unknown	0	0			@Intracellular	Cytoplasmic
P54532	buk	Probable butyrate kinase (BK) (EC 2.7.2.7) (Branched-chain carboxylic acid kinase)			Cytoplasmic	0	0			@Intracellular	Cytoplasmic
P54452	yqeG	Uncharacterized protein YqeG			Unknown	0	0			@Intracellular	Cytoplasmic
P08838	ptsI	Phosphoenolpyruvate-protein phosphotransferase (EC 2.7.3.9) (Phosphotransferase system, enzyme I)			Cytoplasmic	0	0			@Intracellular	Cytoplasmic
P37518	ychF	Ribosome-binding ATPase YchF			Cytoplasmic	0	0			@Intracellular	Cytoplasmic
O32162	sufB	FeS cluster assembly protein SufB			Cytoplasmic	0	0			@Intracellular	Cytoplasmic
P45864	uvsE	UV DNA damage endonuclease (UV-endonuclease) (UVED) (EC 3.-.-.-)			Cytoplasmic	0	0			@Intracellular	Cytoplasmic
P42920	rplC	50S ribosomal protein L3 (BL3)			Cytoplasmic	0	0			@Intracellular	Cytoplasmic
P05652	gyrB	DNA gyrase subunit B (EC 5.99.1.3)			Cytoplasmic	0	0			@Intracellular	Cytoplasmic
O32090	pncB	Nicotinate phosphoribosyltransferase (NAPRTase) (EC 6.3.4.21)			Cytoplasmic	0	0			@Intracellular	Cytoplasmic
P12879	rpsH	30S ribosomal protein S8 (BS8)			Cytoplasmic	0	0			@Intracellular	Cytoplasmic
Q45589	ybbP	Uncharacterized protein YbbP		Yes	CytoplasmicMembrane	3	0			@Multi-transmembrane	Membrane
O07585	yhdP	UPF0053 protein YhdP		Yes	CytoplasmicMembrane	4	0			@Multi-transmembrane(Lipid modified N-termini)	Membrane
O34725	yjhA	Uncharacterized lipoprotein YjhA		Yes	Unknown	0	Y		Yes	@Lipid anchored	Extracellular	PS51257
P39142	pdp	Pyrimidine-nucleoside phosphorylase (PYNP) (EC 2.4.2.2)			Cytoplasmic	0	0			@Intracellular	Cytoplasmic
P54381	glyS	Glycine--tRNA ligase beta subunit (EC 6.1.1.14) (Glycyl-tRNA synthetase beta subunit) (GlyRS)			Cytoplasmic	0	0			@Intracellular	Cytoplasmic
O34726	yflS	Putative malate transporter YflS		Yes	CytoplasmicMembrane	12	0			@Multi-transmembrane	Membrane	GO:0016020|IPR001898|TIGR00785|PF00939
C0SPB0	ytcI	Uncharacterized acyl--CoA ligase YtcI (EC 6.2.1.-)			Cytoplasmic	0	0			@Intracellular	Cytoplasmic
P39456	tcyC	L-cystine import ATP-binding protein TcyC (EC 3.6.3.-)		Yes	CytoplasmicMembrane	0	0			@Intracellular	Cytoplasmic
O05253	yufO	Uncharacterized ABC transporter ATP-binding protein YufO		Yes	CytoplasmicMembrane	0	0			@Intracellular	Cytoplasmic
O31753	dxr	1-deoxy-D-xylulose 5-phosphate reductoisomerase (DXP reductoisomerase) (EC 1.1.1.267) (1-deoxyxylulose-5-phosphate reductoisomerase) (2-C-methyl-D-erythritol 4-phosphate synthase)			Cytoplasmic	0	0			@Intracellular	Cytoplasmic
P96589	ydaO	Uncharacterized amino acid permease YdaO		Yes	CytoplasmicMembrane	11	0			@Multi-transmembrane	Membrane	GO:0016020|IPR002293|PTHR11785|PF13520
O34705	ytpA	Phospholipase YtpA (EC 3.1.1.-) (Bacilysocin biosynthesis protein YtpA)		Yes	CytoplasmicMembrane	0	0			@Intracellular	Cytoplasmic
P17921	pheS	Phenylalanine--tRNA ligase alpha subunit (EC 6.1.1.20) (Phenylalanyl-tRNA synthetase alpha subunit) (PheRS)			Cytoplasmic	0	0			@Intracellular	Cytoplasmic
P37464	serS	Serine--tRNA ligase (EC 6.1.1.11) (Seryl-tRNA synthetase) (SerRS) (Seryl-tRNA(Ser/Sec) synthetase)			Cytoplasmic	0	0			@Intracellular	Cytoplasmic
P37580	fhuD	Iron(3+)-hydroxamate-binding protein FhuD (Ferric hydroxamate uptake protein D) (Ferrichrome-binding protein) (Iron(III)-hydroxamate-binding protein FhuD)		Yes	CytoplasmicMembrane	0	Y		Yes	@Lipid anchored	Extracellular	PS51257
O32045	yrvD	Uncharacterized protein YrvD		Yes	CytoplasmicMembrane	2	0			@Multi-transmembrane	Membrane
Q794W0	yycH	Two-component system YycF/YycG regulatory protein YycH		Yes	CytoplasmicMembrane	1	0			@N-terminally anchored (No CS)	Membrane
P54475	cshB	DEAD-box ATP-dependent RNA helicase CshB (EC 3.6.4.13)			Cytoplasmic	0	0			@Intracellular	Cytoplasmic
P08821	hupA	DNA-binding protein HU 1 (DNA-binding protein II) (HB)			Cytoplasmic	0	0			@Intracellular	Cytoplasmic
P54608	yhcX	Hydrolase YhcX (EC 3.5.-.-)			Cytoplasmic	0	0			@Intracellular	Cytoplasmic
P02394	rplL	50S ribosomal protein L7/L12 (BL9) (Vegetative protein 341) (VEG341)			Cytoplasmic	0	0			@Intracellular	Cytoplasmic
P54453	yqeH	Uncharacterized protein YqeH			Cytoplasmic	0	0			@Intracellular	Cytoplasmic
P35160	resA	Thiol-disulfide oxidoreductase ResA		Yes	CytoplasmicMembrane	1	0			@N-terminally anchored (No CS)	Membrane	GO:0005886|IPR023555|MF_01319
P22322	gpr	Germination protease (EC 3.4.24.78) (GPR endopeptidase) (Germination proteinase) (Spore protease)	sigF|sigG		Cytoplasmic	0	0			@Intracellular	Cytoplasmic
P49853	ykjA	UPF0702 transmembrane protein YkjA (ORF3)		Yes	CytoplasmicMembrane	3	0			@Multi-transmembrane	Membrane
O31777	kbl	8-amino-7-oxononanoate synthase 1 (AONS) (EC 2.3.1.47) (7-keto-8-amino-pelargonic acid synthase) (7-KAP synthase) (KAPA synthase) (8-amino-7-ketopelargonate synthase) (Alpha-oxoamine synthase)			Cytoplasmic	0	0			@Intracellular	Cytoplasmic
P54547	zwf	Glucose-6-phosphate 1-dehydrogenase (G6PD) (EC 1.1.1.49) (Vegetative protein 11) (VEG11)			Cytoplasmic	0	0			@Intracellular	Cytoplasmic
O34788	bdhA	(R,R)-butanediol dehydrogenase (EC 1.1.1.4) (Acetoin reductase/2,3-butanediol dehydrogenase) (AR/BDH)			Cytoplasmic	0	0			@Intracellular	Cytoplasmic
P54516	yqhR	Uncharacterized protein YqhR		Yes	CytoplasmicMembrane	4	0			@Multi-transmembrane	Membrane	IPR024563|PF11085|PD101610
O07584	plsC	1-acyl-sn-glycerol-3-phosphate acyltransferase (1-AGP acyltransferase) (1-AGPAT) (1-acyl-G3P acyltransferase) (EC 2.3.1.n4) (Lysophosphatidic acid acyltransferase) (LPAAT) (Phosphatidic acid synthase) (PA synthase)		Yes	Cytoplasmic	0	0			@Lipid anchored	Extracellular	GO:0016020|IPR004552|TIGR00530
P37949	lepA	Elongation factor 4 (EF-4) (EC 3.6.5.n1) (Ribosomal back-translocase LepA)		Yes	CytoplasmicMembrane	0	0			@Intracellular	Cytoplasmic
Q797S1	ybbF	Putative PTS system EIIBC component YbbF [Includes: Phosphotransferase enzyme IIB component (EC 2.7.1.69) (PTS system EIIB component); Permease IIC component (PTS system EIIC component)]		Yes	CytoplasmicMembrane	9	0			@Multi-transmembrane	Membrane	GO:0016020|IPR003352|PF02378
O31766	ymfH	Uncharacterized zinc protease YmfH (EC 3.4.24.-)			Cytoplasmic	0	0			@Intracellular	Cytoplasmic
P51835	ftsY	Signal recognition particle receptor FtsY (SRP receptor)	sigK	Yes	CytoplasmicMembrane	0	0			@Intracellular	Cytoplasmic
O34847	accA	Acetyl-coenzyme A carboxylase carboxyl transferase subunit alpha (ACCase subunit alpha) (Acetyl-CoA carboxylase carboxyltransferase subunit alpha) (EC 6.4.1.2)			Cytoplasmic	0	0			@Intracellular	Cytoplasmic
O32039	hisS	Histidine--tRNA ligase (EC 6.1.1.21) (Histidyl-tRNA synthetase) (HisRS)			Cytoplasmic	0	0			@Intracellular	Cytoplasmic
P21880	pdhD	Dihydrolipoyl dehydrogenase (EC 1.8.1.4) (Dihydrolipoamide dehydrogenase) (E3 component of pyruvate complex) (S complex, 50 kDa subunit)			Cytoplasmic	0	0			@Intracellular	Cytoplasmic
P54417	opuD	Glycine betaine transporter OpuD		Yes	CytoplasmicMembrane	12	0			@Multi-transmembrane	Membrane	GO:0016020|IPR000060|IPR018093|PF02028|PS01303|TIGR00842
P50840	ypsC	Putative RNA methyltransferase YpsC (EC 2.1.1.-)			Cytoplasmic	0	Y			@Intracellular	Cytoplasmic
O31749	pyrH	Uridylate kinase (UK) (EC 2.7.4.22) (Uridine monophosphate kinase) (UMP kinase) (UMPK)			Unknown	0	0			@Intracellular	Cytoplasmic
Q06754	yacL	Uncharacterized PIN and TRAM-domain containing protein YacL (Putative RNase YacL) (EC 3.1.-.-)		Yes	CytoplasmicMembrane	4	0			@Multi-transmembrane	Membrane
O07608	lplJ	Lipoate-protein ligase LplJ (EC 2.7.7.63) (Lipoate--protein ligase)			Cytoplasmic	0	0			@Intracellular	Cytoplasmic
P71040	clsA	Major cardiolipin synthase ClsA (CL synthase 2) (EC 2.7.8.-)		Yes	CytoplasmicMembrane	2	0			@Multi-transmembrane	Membrane
P42971	pbpC	Penicillin-binding protein 3 (PBP 3) (PSPB20) (Penicillin-binding protein C)		Yes	CytoplasmicMembrane	0	Y		Yes	@Lipid anchored	Extracellular	PS51257
O34617	rlmN	Probable dual-specificity RNA methyltransferase RlmN (EC 2.1.1.-) (EC 2.1.1.192) (23S rRNA (adenine(2503)-C(2))-methyltransferase) (23S rRNA m2A2503 methyltransferase) (Ribosomal RNA large subunit methyltransferase N) (tRNA (adenine(37)-C(2))-methyltransferase) (tRNA m2A37 methyltransferase)			Cytoplasmic	0	0			@Intracellular	Cytoplasmic
P27206	srfAA	Surfactin synthase subunit 1		Yes	Unknown	2	0			@Intracellular	Cytoplasmic
O31729	ylmG	Uncharacterized membrane protein YlmG		Yes	CytoplasmicMembrane	2	0			@Multi-transmembrane	Membrane	GO:0016020|IPR003425|PF02325
P46343	phoH	PhoH-like protein			Cytoplasmic	0	0			@Intracellular	Cytoplasmic
P54485	yqgB	Uncharacterized protein YqgB		Yes	CytoplasmicMembrane	4	0			@Multi-transmembrane	Membrane
P49940	gerKB	Spore germination protein KB	sigG	Yes	CytoplasmicMembrane	10	0			@Multi-transmembrane	Membrane	GO:0016021|IPR004761|TIGR00912|PF03845
O07576	yhdG	Uncharacterized amino acid permease YhdG		Yes	CytoplasmicMembrane	13	0			@Multi-transmembrane	Membrane	GO:0016020|IPR002293|PTHR11785|PF13520|PIRSF006060
O34628	yvlB	Uncharacterized protein YvlB			Cytoplasmic	0	0			@Intracellular	Cytoplasmic
P39644	ywfH	Bacilysin biosynthesis oxidoreductase YwfH (EC 1.-.-.-)			Cytoplasmic	0	Y			@Intracellular	Cytoplasmic
P04831	sspA	Small, acid-soluble spore protein A (SASP)	sigG		Cytoplasmic	0	0			@Intracellular	Cytoplasmic
P55874	rpmI	50S ribosomal protein L35			Cytoplasmic	0	0			@Intracellular	Cytoplasmic
Q45066	parC	DNA topoisomerase 4 subunit A (EC 5.99.1.3) (Topoisomerase IV subunit A)			Cytoplasmic	0	0			@Intracellular	Cytoplasmic
P32959	pbpE	Penicillin-binding protein 4* (PBP 4*) (PBP 4A) (Penicillin-binding protein E)		Yes	CytoplasmicMembrane	0	0			@Intracellular	Cytoplasmic
O31743	rbgA	Ribosome biogenesis GTPase A			Cytoplasmic	0	0			@Intracellular	Cytoplasmic
P42978	ypjC	UPF0750 membrane protein YpjC		Yes	CytoplasmicMembrane	6	0			@Multi-transmembrane	Membrane	IPR003740|PF02588|PIRSF006483
P39074	bmrU	Putative lipid kinase BmrU (EC 2.7.1.-)			Unknown	0	0			@Intracellular	Cytoplasmic
O34623	dnaE	DNA polymerase III subunit alpha (EC 2.7.7.7)			Cytoplasmic	0	0			@Intracellular	Cytoplasmic
O31440	cypC	Fatty-acid peroxygenase (EC 1.11.2.4) (Cytochrome P450 152A1) (Cytochrome P450BsBeta) (Fatty acid beta-hydroxylase)		Yes	Cytoplasmic	1	0			@Intracellular	Cytoplasmic
P71088	spo0M	Sporulation-control protein spo0M (Stage 0 sporulation protein M)			Cytoplasmic	0	0			@Intracellular	Cytoplasmic
O34506	yngL	UPF0713 protein YngL		Yes	CytoplasmicMembrane	3	0			@Multi-transmembrane	Membrane
P20964	obg	GTPase ObgE (GTP-binding protein Obg) (OrfA) (Spo0B-associated GTP-binding protein)			Cytoplasmic	0	0			@Intracellular	Cytoplasmic
P42953	tagG	Teichoic acid translocation permease protein TagG		Yes	CytoplasmicMembrane	6	0			@Multi-transmembrane	Membrane	GO:0016020|IPR000412|IPR013525|PS51012|PF01061
P25813	rsmG	Ribosomal RNA small subunit methyltransferase G (EC 2.1.1.-) (16S rRNA 7-methylguanosine methyltransferase) (16S rRNA m7G methyltransferase) (Glucose-inhibited division protein B)			Cytoplasmic	0	0			@Intracellular	Cytoplasmic
P37941	bfmBAB	2-oxoisovalerate dehydrogenase subunit beta (EC 1.2.4.4) (Branched-chain alpha-keto acid dehydrogenase E1 component beta chain) (BCKDH E1-beta)			Cytoplasmic	0	0			@Intracellular	Cytoplasmic
P80886	sucC	Succinyl-CoA ligase [ADP-forming] subunit beta (EC 6.2.1.5) (Succinyl-CoA synthetase subunit beta) (SCS-beta) (Vegetative protein 63) (VEG63)			Cytoplasmic	0	0			@Intracellular	Cytoplasmic
P54519	yqhY	Uncharacterized protein YqhY			Cytoplasmic	0	0			@Intracellular	Cytoplasmic
P54554	yqjQ	Uncharacterized oxidoreductase YqjQ (EC 1.-.-.-)			Cytoplasmic	0	0			@Intracellular	Cytoplasmic
O06979	yvcQ	Sensor histidine kinase YvcQ (EC 2.7.13.3)		Yes	CytoplasmicMembrane	2	0			@Multi-transmembrane	Membrane
P55339	ecsA	ABC-type transporter ATP-binding protein EcsA		Yes	CytoplasmicMembrane	0	0			@Intracellular	Cytoplasmic
O31545	yfjO	Uncharacterized RNA methyltransferase YfjO (EC 2.1.1.-)			Cytoplasmic	0	0			@Intracellular	Cytoplasmic
P94478	hflX	GTPase HflX (GTP-binding protein HflX)			Cytoplasmic	0	0			@Intracellular	Cytoplasmic
O32164	csd	Probable cysteine desulfurase (EC 2.8.1.7)			Cytoplasmic	0	0			@Intracellular	Cytoplasmic
P70974	rplM	50S ribosomal protein L13		Yes	CytoplasmicMembrane	0	0			@Intracellular	Cytoplasmic
O31764	ymfF	Probable inactive metalloprotease YmfF			Cytoplasmic	0	0			@Intracellular	Cytoplasmic
P07343	fumC	Fumarate hydratase class II (Fumarase C) (EC 4.2.1.2)			Cytoplasmic	0	0			@Intracellular	Cytoplasmic
O32243	opuCC	Glycine betaine/carnitine/choline-binding protein OpuCC (Osmoprotectant-binding protein)		Yes	CytoplasmicMembrane	0	Y		Yes	@Lipid anchored	Extracellular	PS51257
P96616	ydbT	UPF0699 transmembrane protein YdbT		Yes	CytoplasmicMembrane	6	0			@Multi-transmembrane	Membrane
O34508	ykfB	L-Ala-D/L-Glu epimerase (AE epimerase) (AEE) (EC 5.1.1.n1)			Cytoplasmic	0	0			@Intracellular	Cytoplasmic
P37468	rsmA	Ribosomal RNA small subunit methyltransferase A (EC 2.1.1.182) (16S rRNA (adenine(1518)-N(6)/adenine(1519)-N(6))-dimethyltransferase) (16S rRNA dimethyladenosine transferase) (16S rRNA dimethylase) (S-adenosylmethionine-6-N', N'-adenosyl(rRNA) dimethyltransferase)	sigF		Cytoplasmic	0	0			@Intracellular	Cytoplasmic
O31446	ybfF	Uncharacterized protein YbfF		Yes	CytoplasmicMembrane	4	0			@Multi-transmembrane	Membrane
O05521	rex	Redox-sensing transcriptional repressor Rex			Unknown	0	0			@Intracellular	Cytoplasmic
P39803	yitT	UPF0750 membrane protein YitT		Yes	CytoplasmicMembrane	6	0			@Multi-transmembrane	Membrane	IPR003740|PIRSF006483|PF02588
O07622	yhfW	Putative Rieske 2Fe-2S iron-sulfur protein YhfW (EC 1.-.-.-)	sigF	Yes	Cytoplasmic	0	0			@Intracellular	Cytoplasmic	GO:0016020|IPR005805|PR00162
O32215	helD	Helicase IV (EC 3.6.4.12)			Cytoplasmic	0	0			@Intracellular	Cytoplasmic
P55180	galE	UDP-glucose 4-epimerase (EC 5.1.3.2) (Galactowaldenase) (UDP-galactose 4-epimerase)			Cytoplasmic	0	0			@Intracellular	Cytoplasmic
P37554	spoVT	Stage V sporulation protein T	sigF|sigG		Cytoplasmic	0	0			@Intracellular	Cytoplasmic
O32234	yvaM	AB hydrolase superfamily protein YvaM (EC 3.-.-.-)			Cytoplasmic	0	0			@Intracellular	Cytoplasmic
P54495	glcK	Glucokinase (EC 2.7.1.2) (Glucose kinase)			Cytoplasmic	0	0			@Intracellular	Cytoplasmic
O35033	coaBC	Probable coenzyme A biosynthesis bifunctional protein CoaBC (DNA/pantothenate metabolism flavoprotein) [Includes: Phosphopantothenoylcysteine decarboxylase (PPCDC) (EC 4.1.1.36) (CoaC); Phosphopantothenate--cysteine ligase (EC 6.3.2.5) (CoaB) (PPC synthetase) (PPCS) (Phosphopantothenoylcysteine synthase)]		Yes	Cytoplasmic	0	Y			@N-terminally anchored (with CS)	Membrane
P49787	accC1	Biotin carboxylase 1 (EC 6.3.4.14) (Acetyl-CoA carboxylase subunit A 1) (ACC 1) (EC 6.4.1.2)			Cytoplasmic	0	0			@Intracellular	Cytoplasmic
P42060	rplV	50S ribosomal protein L22			Cytoplasmic	0	0			@Intracellular	Cytoplasmic
P37550	ispE	4-diphosphocytidyl-2-C-methyl-D-erythritol kinase (CMK) (EC 2.7.1.148) (4-(cytidine-5'-diphospho)-2-C-methyl-D-erythritol kinase)			Cytoplasmic	0	0			@Intracellular	Cytoplasmic
O32246	yvbI	Uncharacterized protein YvbI		Yes	CytoplasmicMembrane	5	0			@Multi-transmembrane	Membrane	PD113106
P37535	yaaN	Uncharacterized protein YaaN			Cytoplasmic	0	0			@Intracellular	Cytoplasmic
O34917	ytfI	Uncharacterized protein YtfI	sigF	Yes	Unknown	0	Y			@N-terminally anchored (No CS)	Membrane
P17820	dnaK	Chaperone protein DnaK (HSP70) (Heat shock 70 kDa protein) (Heat shock protein 70)			Cytoplasmic	0	0			@Intracellular	Cytoplasmic
O32219	cadA	Cadmium, zinc and cobalt-transporting ATPase (EC 3.6.3.3) (EC 3.6.3.5)		Yes	CytoplasmicMembrane	8	0			@Multi-transmembrane	Membrane	GO:0016021|IPR027256|IPR001757|PR00941|TIGR01525|TIGR01494|PR00119
O31656	ykrK	Uncharacterized protein YkrK			Cytoplasmic	0	0			@Intracellular	Cytoplasmic
P54523	dxs	1-deoxy-D-xylulose-5-phosphate synthase (EC 2.2.1.7) (1-deoxyxylulose-5-phosphate synthase) (DXP synthase) (DXPS)			Cytoplasmic	0	0			@Intracellular	Cytoplasmic
Q45598	yydD	Uncharacterized protein YydD			Cytoplasmic	0	0			@Intracellular	Cytoplasmic
P37940	bfmBAA	2-oxoisovalerate dehydrogenase subunit alpha (EC 1.2.4.4) (Branched-chain alpha-keto acid dehydrogenase E1 component alpha chain) (BCKDH E1-alpha)			Cytoplasmic	0	0			@Intracellular	Cytoplasmic
O07523	yhaP	Uncharacterized protein YhaP		Yes	CytoplasmicMembrane	7	0			@Multi-transmembrane	Membrane
O34745	yodF	Uncharacterized symporter YodF		Yes	CytoplasmicMembrane	13	0			@Multi-transmembrane	Membrane	GO:0016020|IPR001734|PTHR11819|PS50283|PF00474
O34860	rsbRB	RsbT co-antagonist protein RsbRB (Stressosome protein RsbRB)			Cytoplasmic	0	0			@Intracellular	Cytoplasmic
O32220	copA	Copper-exporting P-type ATPase A (Protein CopA) (EC 3.6.3.54) (Cu(+)-exporting ATPase)		Yes	CytoplasmicMembrane	8	0			@Multi-transmembrane	Membrane	GO:0016021|IPR001757|IPR027256|TIGR01494|PR00119|TIGR01525
P17894	recN	DNA repair protein RecN (Recombination protein N)			Cytoplasmic	0	0			@Intracellular	Cytoplasmic
P46208	htpG	Chaperone protein HtpG (Heat shock protein HtpG) (High temperature protein G)			Cytoplasmic	0	0			@Intracellular	Cytoplasmic
P26899	ansB	Aspartate ammonia-lyase (Aspartase) (EC 4.3.1.1)			Cytoplasmic	0	0			@Intracellular	Cytoplasmic
P42305	dbpA	ATP-dependent RNA helicase DbpA (EC 3.6.4.13)			Cytoplasmic	0	0			@Intracellular	Cytoplasmic
P05649	dnaN	DNA polymerase III subunit beta (EC 2.7.7.7)			Cytoplasmic	0	0			@Intracellular	Cytoplasmic
C0SP93	accD	Acetyl-coenzyme A carboxylase carboxyl transferase subunit beta (ACCase subunit beta) (Acetyl-CoA carboxylase carboxyltransferase subunit beta) (EC 6.4.1.2)			Cytoplasmic	0	0			@Intracellular	Cytoplasmic
P94584	fabZ	3-hydroxyacyl-[acyl-carrier-protein] dehydratase FabZ (EC 4.2.1.59) ((3R)-hydroxymyristoyl-[acyl-carrier-protein] dehydratase) ((3R)-hydroxymyristoyl-ACP dehydrase) (Beta-hydroxyacyl-ACP dehydratase)		Yes	Cytoplasmic	1	0			@Intracellular	Cytoplasmic
P80859	gndA	6-phosphogluconate dehydrogenase, NADP(+)-dependent, decarboxylating (EC 1.1.1.44) (GNTZII)			Cytoplasmic	0	0			@Intracellular	Cytoplasmic
O05235	yugF	Uncharacterized hydrolase YugF (EC 3.1.-.-)			Cytoplasmic	0	0			@Intracellular	Cytoplasmic
P08064	sdhC	Succinate dehydrogenase cytochrome b558 subunit (Cytochrome b-558)		Yes	CytoplasmicMembrane	5	0			@Multi-transmembrane	Membrane	IPR000701|PF01127
P20691	aroE	3-phosphoshikimate 1-carboxyvinyltransferase (EC 2.5.1.19) (5-enolpyruvylshikimate-3-phosphate synthase) (EPSP synthase) (EPSPS)			Cytoplasmic	0	0			@Intracellular	Cytoplasmic
P22250	gltX	Glutamate--tRNA ligase (EC 6.1.1.17) (Glutamyl-tRNA synthetase) (GluRS)			Cytoplasmic	0	0			@Intracellular	Cytoplasmic
P37954	uvrB	UvrABC system protein B (Protein UvrB) (Excinuclease ABC subunit B) (Protein DinA)			Cytoplasmic	0	0			@Intracellular	Cytoplasmic
P45919	yqbC	Uncharacterized protein YqbC		Yes	Unknown	1	0			@N-terminally anchored (No CS)	Membrane
P12875	rplN	50S ribosomal protein L14			Cytoplasmic	0	0			@Intracellular	Cytoplasmic
P29726	purA	Adenylosuccinate synthetase (AMPSase) (AdSS) (EC 6.3.4.4) (IMP--aspartate ligase)			Cytoplasmic	0	0			@Intracellular	Cytoplasmic
O31717	ykpB	Uncharacterized oxidoreductase YkpB (EC 1.1.1.-)		Yes	CytoplasmicMembrane	0	0			@Intracellular	Cytoplasmic
P42974	ahpF	NADH dehydrogenase (EC 1.6.99.3) (Alkyl hydroperoxide reductase)		Yes	CytoplasmicMembrane	0	0			@Intracellular	Cytoplasmic
O06988	bbmA	Intracellular maltogenic amylase (EC 3.2.1.-)			Cytoplasmic	0	0			@Intracellular	Cytoplasmic
C0SPB4	yhaQ	Uncharacterized ABC transporter ATP-binding protein YhaQ		Yes	CytoplasmicMembrane	0	0			@Intracellular	Cytoplasmic
O31498	ligA	DNA ligase (EC 6.5.1.2) (Polydeoxyribonucleotide synthase [NAD(+)])			Cytoplasmic	0	0			@Intracellular	Cytoplasmic
P54470	yqfL	Putative pyruvate, phosphate dikinase regulatory protein (PPDK regulatory protein) (EC 2.7.11.32) (EC 2.7.4.27)			Cytoplasmic	0	0			@Intracellular	Cytoplasmic
P94545	mutSB	Endonuclease MutS2 (EC 3.1.-.-)			Cytoplasmic	0	0			@Intracellular	Cytoplasmic
O05240	yugK	Probable NADH-dependent butanol dehydrogenase 2 (EC 1.1.1.-)			Cytoplasmic	0	0			@Intracellular	Cytoplasmic
P46899	rplR	50S ribosomal protein L18 (BL16)			Cytoplasmic	0	0			@Intracellular	Cytoplasmic
P54537	artM	Arginine transport ATP-binding protein ArtM		Yes	CytoplasmicMembrane	0	0			@Intracellular	Cytoplasmic
O32169	metN	Methionine import ATP-binding protein MetN (EC 3.6.3.-)		Yes	CytoplasmicMembrane	0	0			@Intracellular	Cytoplasmic
O34977	ythP	Uncharacterized ABC transporter ATP-binding protein YthP (EC 3.6.3.-)		Yes	CytoplasmicMembrane	0	0			@Intracellular	Cytoplasmic
P50736	ypdA	Uncharacterized protein YpdA			Cytoplasmic	0	0			@Intracellular	Cytoplasmic
O06973	yvcJ	UPF0042 nucleotide-binding protein YvcJ			Cytoplasmic	0	0			@Intracellular	Cytoplasmic
O32229	yvaG	Uncharacterized oxidoreductase YvaG (EC 1.-.-.-)		Yes	Cytoplasmic	0	0			@N-terminally anchored (No CS)	Membrane
P39574	galK	Galactokinase (EC 2.7.1.6) (Galactose kinase)			Cytoplasmic	0	0			@Intracellular	Cytoplasmic
O32095	yueF	UPF0118 membrane protein YueF		Yes	CytoplasmicMembrane	8	0			@Multi-transmembrane	Membrane
O34874	iscS2	Putative cysteine desulfurase IscS 2 (EC 2.8.1.7)			Cytoplasmic	0	0			@Intracellular	Cytoplasmic
O31824	nrnB	Oligoribonuclease NrnB (EC 3.1.-.-) (NanoRNase B)			Cytoplasmic	0	0			@Intracellular	Cytoplasmic
P50743	der	GTPase Der (GTP-binding protein EngA)		Yes	CytoplasmicMembrane	0	0			@Intracellular	Cytoplasmic
Q08311	cotY	Spore coat protein Y	sigK		Cytoplasmic	0	0			@Intracellular	Cytoplasmic
Q02115	lytR	Transcriptional regulator LytR (Membrane-bound protein LytR)		Yes	CytoplasmicMembrane	1	0			@N-terminally anchored (No CS)	Membrane
P35163	resD	Transcriptional regulatory protein ResD			Cytoplasmic	0	0			@Intracellular	Cytoplasmic
P39141	nupC	Pyrimidine nucleoside transport protein		Yes	CytoplasmicMembrane	9	Y			@Multi-transmembrane	Membrane	GO:0016020|IPR008276|IPR018270|PTHR10590|TIGR00804
P42248	ycbP	Uncharacterized protein YcbP (ORF15)		Yes	CytoplasmicMembrane	4	0			@Multi-transmembrane	Membrane
P42954	tagH	Teichoic acids export ATP-binding protein TagH (EC 3.6.3.40) (Teichoic acid-transporting ATPase)		Yes	CytoplasmicMembrane	1	0			@Intracellular /TMH start AFTER 60	Cytoplasmic	GO:0005886|GO:0016020|IPR030284|IPR015860|PTHR24220:SF310|PS51251
P50831	ypvA	Probable ATP-dependent helicase YpvA (EC 3.6.4.12)			Cytoplasmic	0	0			@Intracellular	Cytoplasmic
C0SPB9	ykoN	Uncharacterized glycosyltransferase YkoN (EC 2.4.-.-)		Yes	CytoplasmicMembrane	0	Y			@Intracellular	Cytoplasmic
P37811	atpH	ATP synthase subunit delta (ATP synthase F(1) sector subunit delta) (F-type ATPase subunit delta) (F-ATPase subunit delta)		Yes	Cytoplasmic	0	0			@Intracellular	Cytoplasmic	GO:0016020|IPR020781|PS00389
O34921	ytoI	Uncharacterized protein YtoI			Cytoplasmic	0	0			@Intracellular	Cytoplasmic
P25053	tenI	Regulatory protein TenI			Cytoplasmic	0	0			@Intracellular	Cytoplasmic
P25144	ccpA	Catabolite control protein A (Glucose-resistance amylase regulator)			Cytoplasmic	0	0			@Intracellular	Cytoplasmic
Q59192	parE	DNA topoisomerase 4 subunit B (EC 5.99.1.3) (Topoisomerase IV subunit B)			Cytoplasmic	0	0			@Intracellular	Cytoplasmic
O34946	znuC	High-affinity zinc uptake system ATP-binding protein ZnuC (EC 3.6.3.-)		Yes	CytoplasmicMembrane	0	0			@Intracellular	Cytoplasmic
P18159	pgcA	Phosphoglucomutase (PGM) (EC 5.4.2.2) (Alpha-phosphoglucomutase) (Glucose phosphomutase)			Cytoplasmic	0	0			@Intracellular	Cytoplasmic
O34403	mutM	Formamidopyrimidine-DNA glycosylase (Fapy-DNA glycosylase) (EC 3.2.2.23) (DNA-(apurinic or apyrimidinic site) lyase MutM) (AP lyase MutM) (EC 4.2.99.18)			Cytoplasmic	0	0			@Intracellular	Cytoplasmic
O34693	yloA	Uncharacterized protein YloA			Cytoplasmic	0	0			@Intracellular	Cytoplasmic
O31689	ykvY	Putative dipeptidase YkvY (EC 3.4.13.-)			Cytoplasmic	0	0			@Intracellular	Cytoplasmic
O32065	ytzB	Uncharacterized protein YtzB			Unknown	0	Y			@Intracellular	Cytoplasmic
O32106	pepA	Probable cytosol aminopeptidase (EC 3.4.11.1) (Leucine aminopeptidase) (LAP) (EC 3.4.11.10) (Leucyl aminopeptidase)			Cytoplasmic	0	0			@Intracellular	Cytoplasmic
P31104	aroF	Chorismate synthase (EC 4.2.3.5) (5-enolpyruvylshikimate-3-phosphate phospholyase) (Vegetative protein 216) (VEG216)			Cytoplasmic	0	0			@Intracellular	Cytoplasmic
P42108	yxaI	Uncharacterized protein YxaI		Yes	CytoplasmicMembrane	3	0			@Multi-transmembrane	Membrane
P70970	ecfAB	Energy-coupling factor transporter ATP-binding protein EcfA2 (ECF transporter A component EcfA2) (EC 3.6.3.-) (ECF transporter A component EcfA')		Yes	CytoplasmicMembrane	0	0			@Intracellular	Cytoplasmic	GO:0016020|IPR015856|PS51246
P19670	murAB	UDP-N-acetylglucosamine 1-carboxyvinyltransferase 2 (EC 2.5.1.7) (Enoylpyruvate transferase 2) (UDP-N-acetylglucosamine enolpyruvyl transferase 2) (EPT 2)		Yes	Cytoplasmic	1	0			@Intracellular	Cytoplasmic
P54380	glyQ	Glycine--tRNA ligase alpha subunit (EC 6.1.1.14) (Glycyl-tRNA synthetase alpha subunit) (GlyRS)			Cytoplasmic	0	0			@Intracellular	Cytoplasmic
O07001	yvdT	Uncharacterized HTH-type transcriptional regulator YvdT			Cytoplasmic	0	0			@Intracellular	Cytoplasmic
P16263	odhB	Dihydrolipoyllysine-residue succinyltransferase component of 2-oxoglutarate dehydrogenase complex (EC 2.3.1.61) (2-oxoglutarate dehydrogenase complex component E2) (OGDC-E2) (Dihydrolipoamide succinyltransferase component of 2-oxoglutarate dehydrogenase complex)			Cytoplasmic	0	0			@Intracellular	Cytoplasmic
P32727	nusA	Transcription termination/antitermination protein NusA			Cytoplasmic	0	0			@Intracellular	Cytoplasmic
O07615	yhfP	Putative quinone oxidoreductase YhfP (EC 1.6.5.-)			Cytoplasmic	0	0			@Intracellular	Cytoplasmic
O34814	ftsE	Cell division ATP-binding protein FtsE		Yes	CytoplasmicMembrane	0	0			@Intracellular	Cytoplasmic
P39821	proA	Gamma-glutamyl phosphate reductase (GPR) (EC 1.2.1.41) (Glutamate-5-semialdehyde dehydrogenase) (Glutamyl-gamma-semialdehyde dehydrogenase) (GSA dehydrogenase)			Cytoplasmic	0	0			@Intracellular	Cytoplasmic
P96612	ddl	D-alanine--D-alanine ligase (EC 6.3.2.4) (D-Ala-D-Ala ligase) (D-alanylalanine synthetase)			Cytoplasmic	0	0			@Intracellular	Cytoplasmic
O31428	skfF	Putative bacteriocin-SkfA transport system permease protein SkfF		Yes	CytoplasmicMembrane	13	Y			@Multi-transmembrane	Membrane
O34872	ytiB	Putative carbonic anhydrase YtiB (EC 4.2.1.1) (Carbonate dehydratase)			Cytoplasmic	0	0			@Intracellular	Cytoplasmic
P32731	rbfA	Ribosome-binding factor A			Cytoplasmic	0	0			@Intracellular	Cytoplasmic
P96605	ydbJ	Uncharacterized ABC transporter ATP-binding protein YdbJ		Yes	CytoplasmicMembrane	0	0			@Intracellular	Cytoplasmic
P04832	sspB	Small, acid-soluble spore protein B (SASP)	sigG		Cytoplasmic	0	0			@Secreted via minor pathways (bacteriocin) (no CS)	Extracellular
P96604	ydbI	UPF0118 membrane protein YdbI		Yes	CytoplasmicMembrane	7	0			@Multi-transmembrane	Membrane
O31580	yfhL	Uncharacterized protein YfhL		Yes	CytoplasmicMembrane	3	0			@Multi-transmembrane	Membrane
P37573	disA	DNA integrity scanning protein DisA (Cyclic di-AMP synthase) (c-di-AMP synthase) (Diadenylate cyclase) (EC 2.7.7.85)			Cytoplasmic	0	0			@Intracellular	Cytoplasmic
Q07876	rsmH	Ribosomal RNA small subunit methyltransferase H (EC 2.1.1.199) (16S rRNA m(4)C1402 methyltransferase) (rRNA (cytosine-N(4)-)-methyltransferase RsmH)			Cytoplasmic	0	0			@Intracellular	Cytoplasmic
O06990	mdxF	Maltodextrin transport system permease protein MdxF		Yes	CytoplasmicMembrane	9	Y			@Multi-transmembrane	Membrane	GO:0016020|IPR000515|PF00528|PS50928|G3DSA:1.10.3720.10|SSF161098
P94548	fadR	Fatty acid metabolism regulator protein			Cytoplasmic	0	0			@Intracellular	Cytoplasmic
Q01464	minD	Septum site-determining protein MinD (Cell division inhibitor MinD)		Yes	CytoplasmicMembrane	0	0			@Intracellular	Cytoplasmic
Q08432	patB	Cystathionine beta-lyase PatB (CBL) (EC 4.4.1.8) (Beta-cystathionase) (Cysteine lyase)			Unknown	0	0			@Intracellular	Cytoplasmic
P37551	purR	Pur operon repressor			Cytoplasmic	0	0			@Intracellular	Cytoplasmic
P54457	rsfS	Ribosomal silencing factor RsfS			Cytoplasmic	0	0			@Intracellular	Cytoplasmic
P46323	cinA	Putative competence-damage inducible protein		Yes	CytoplasmicMembrane	0	0			@Intracellular	Cytoplasmic
P96676	ydeS	Uncharacterized HTH-type transcriptional regulator YdeS			Cytoplasmic	0	0			@Intracellular	Cytoplasmic
P05651	recF	DNA replication and repair protein RecF			Cytoplasmic	0	0			@Intracellular	Cytoplasmic
P14951	uvrC	UvrABC system protein C (Protein UvrC) (Excinuclease ABC subunit C)			Cytoplasmic	0	0			@Intracellular	Cytoplasmic
P80700	tsf	Elongation factor Ts (EF-Ts)			Cytoplasmic	0	0			@Intracellular	Cytoplasmic
Q00777	proG	Pyrroline-5-carboxylate reductase 3 (P5C reductase 3) (P5CR 3) (EC 1.5.1.2)			Cytoplasmic	0	0			@Intracellular	Cytoplasmic
P20692	tyrA	Prephenate dehydrogenase (PDH) (EC 1.3.1.12)		Yes	Cytoplasmic	0	Y			@N-terminally anchored (No CS)	Membrane
P40924	pgk	Phosphoglycerate kinase (EC 2.7.2.3)			Cytoplasmic	0	0			@Intracellular	Cytoplasmic
P54374	aroD	Shikimate dehydrogenase (EC 1.1.1.25)			Cytoplasmic	0	0			@Intracellular	Cytoplasmic
P94377	katX	Catalase X (EC 1.11.1.6)	sigF		Cytoplasmic	0	0			@Intracellular	Cytoplasmic
O32165	sufD	FeS cluster assembly protein SufD			Unknown	0	0			@Intracellular	Cytoplasmic
P94546	yshE	UPF0719 transmembrane protein YshE		Yes	CytoplasmicMembrane	4	0			@Multi-transmembrane	Membrane
O34398	ligd	Bifunctional non-homologous end joining protein LigD (NHEJ DNA polymerase) [Includes: DNA ligase (Lig) (EC 6.5.1.1) (Polydeoxyribonucleotide synthase [ATP]); DNA repair polymerase (Pol) (Polymerase/primase)]	sigG		Cytoplasmic	0	0			@Intracellular	Cytoplasmic
P26908	rplU	50S ribosomal protein L21 (BL20)			Unknown	0	0			@Intracellular	Cytoplasmic
P54716	glvA	Maltose-6'-phosphate glucosidase (EC 3.2.1.122) (6-phospho-alpha-D-glucosidase) (6-phosphoryl-O-alpha-D-glucopyranosyl:phosphoglucohydrolase)		Yes	Cytoplasmic	1	0			@N-terminally anchored (No CS)	Membrane
O34924	ytoP	Putative aminopeptidase YtoP (EC 3.4.11.-)			Cytoplasmic	0	0			@Intracellular	Cytoplasmic
P39773	gpmI	2,3-bisphosphoglycerate-independent phosphoglycerate mutase (BPG-independent PGAM) (Phosphoglyceromutase) (iPGM) (EC 5.4.2.12) (Vegetative protein 107) (VEG107)			Cytoplasmic	0	0			@Intracellular	Cytoplasmic
Q05852	gtaB	UTP--glucose-1-phosphate uridylyltransferase (EC 2.7.7.9) (Alpha-D-glucosyl-1-phosphate uridylyltransferase) (General stress protein 33) (GSP33) (UDP-glucose pyrophosphorylase) (UDPGP) (Uridine diphosphoglucose pyrophosphorylase)			Cytoplasmic	0	Y			@Secretory(released) (with CS)	Extracellular
P30949	hemL	Glutamate-1-semialdehyde 2,1-aminomutase (GSA) (EC 5.4.3.8) (Glutamate-1-semialdehyde aminotransferase) (GSA-AT)			Cytoplasmic	0	0			@Intracellular	Cytoplasmic
P37563	tilS	tRNA(Ile)-lysidine synthase (EC 6.3.4.19) (tRNA(Ile)-2-lysyl-cytidine synthase) (tRNA(Ile)-lysidine synthetase)			Cytoplasmic	0	0			@Intracellular	Cytoplasmic
Q06752	cysS	Cysteine--tRNA ligase (EC 6.1.1.16) (Cysteinyl-tRNA synthetase) (CysRS)			Cytoplasmic	0	0			@Intracellular	Cytoplasmic
O31605	yjbG	Oligoendopeptidase F homolog (EC 3.4.24.-)		Yes	Cytoplasmic	0	Y			@N-terminally anchored (No CS)	Membrane
P54482	ispG	4-hydroxy-3-methylbut-2-en-1-yl diphosphate synthase (EC 1.17.7.1) (1-hydroxy-2-methyl-2-(E)-butenyl 4-diphosphate synthase)	sigE		Cytoplasmic	0	0			@Intracellular	Cytoplasmic
P54511	lipM	Octanoyltransferase LipM (EC 2.3.1.181) (Octanoyl-[acyl-carrier-protein]:[GcvH] N-octanoyltransferase)			Cytoplasmic	0	0			@Intracellular	Cytoplasmic
P54531	yqiT	Leucine dehydrogenase (LeuDH) (EC 1.4.1.9)			Cytoplasmic	0	0			@Intracellular	Cytoplasmic
O32117	yutJ	NADH dehydrogenase-like protein YutJ (EC 1.6.-.-)		Yes	CytoplasmicMembrane	0	0			@Intracellular	Cytoplasmic
O06974	mgfK	Gluconeogenesis factor			Cytoplasmic	0	0			@Intracellular	Cytoplasmic
P40869	spoVAD	Stage V sporulation protein AD	sigG		Unknown	0	0			@Intracellular	Cytoplasmic
P94434	ycnL	Uncharacterized protein YcnL		Yes	CytoplasmicMembrane	2	0			@Multi-transmembrane	Membrane
P51833	rnc	Ribonuclease 3 (EC 3.1.26.3) (Ribonuclease III) (RNase III)			Cytoplasmic	0	0			@Intracellular	Cytoplasmic
P54508	yqhG	Uncharacterized protein YqhG	sigF		Cytoplasmic	0	0			@Intracellular	Cytoplasmic
Q04805	ymxG	Uncharacterized zinc protease YmxG (EC 3.4.24.-) (ORFP)			Cytoplasmic	0	0			@Intracellular	Cytoplasmic
P54382	folD	Bifunctional protein FolD [Includes: Methylenetetrahydrofolate dehydrogenase (EC 1.5.1.5); Methenyltetrahydrofolate cyclohydrolase (EC 3.5.4.9)]			Cytoplasmic	0	0			@Intracellular	Cytoplasmic
P94356	yxkC	Uncharacterized protein YxkC		Yes	Unknown	0	Y			@N-terminally anchored (No CS)	Membrane
Q04795	dapG	Aspartokinase 1 (EC 2.7.2.4) (Aspartate kinase 1) (Aspartokinase I)	sigK		Cytoplasmic	0	0			@Intracellular	Cytoplasmic
O06975	whiA	Putative sporulation transcription regulator WhiA			Cytoplasmic	0	0			@Intracellular	Cytoplasmic
O07595	cobB	NAD-dependent protein deacetylase (EC 3.5.1.-) (Regulatory protein SIR2 homolog)			Cytoplasmic	0	0			@Intracellular	Cytoplasmic
P96615	ydbS	UPF0699 transmembrane protein YdbS		Yes	CytoplasmicMembrane	2	0			@Multi-transmembrane	Membrane
O07020	lutA	Lactate utilization protein A		Yes	CytoplasmicMembrane	0	Y			@Intracellular	Cytoplasmic
O31854	yojJ	Uncharacterized protein YojJ	sigG	Yes	Cytoplasmic	0	0			@Intracellular	Cytoplasmic	IPR019457|PF10372
O34962	ytsJ	Probable NAD-dependent malic enzyme 4 (NAD-ME 4) (EC 1.1.1.38)			Cytoplasmic	0	0			@Intracellular	Cytoplasmic
P29727	guaA	GMP synthase [glutamine-hydrolyzing] (EC 6.3.5.2) (GMP synthetase) (Glutamine amidotransferase)			Cytoplasmic	0	0			@Intracellular	Cytoplasmic
P37494	yybJ	Uncharacterized ABC transporter ATP-binding protein YybJ		Yes	CytoplasmicMembrane	0	0			@Intracellular	Cytoplasmic
P42924	rplW	50S ribosomal protein L23			Cytoplasmic	0	0			@Intracellular	Cytoplasmic
O05518	tsaD	tRNA N6-adenosine threonylcarbamoyltransferase (EC 2.3.1.-) (t(6)A37 threonylcarbamoyladenosine biosynthesis protein TsaD) (tRNA threonylcarbamoyladenosine biosynthesis protein TsaD)			Cytoplasmic	0	0			@Intracellular	Cytoplasmic
P54448	yqeC	Putative 6-phosphogluconate dehydrogenase YqeC (EC 1.1.1.-)			Cytoplasmic	0	0			@Intracellular	Cytoplasmic
O32268	tuaG	Putative teichuronic acid biosynthesis glycosyltransferase TuaG (EC 2.4.-.-)	sigF	Yes	CytoplasmicMembrane	0	0			@Intracellular	Cytoplasmic
O34595	thiI	Probable tRNA sulfurtransferase (EC 2.8.1.4) (Sulfur carrier protein ThiS sulfurtransferase) (Thiamine biosynthesis protein ThiI) (tRNA 4-thiouridine synthase)			Cytoplasmic	0	0			@Intracellular	Cytoplasmic
P30950	hemB	Delta-aminolevulinic acid dehydratase (ALAD) (ALADH) (EC 4.2.1.24) (Porphobilinogen synthase)			Cytoplasmic	0	0			@Intracellular	Cytoplasmic
P54509	yqhH	Uncharacterized ATP-dependent helicase YqhH (EC 3.6.4.-)	sigF		Cytoplasmic	0	0			@Intracellular	Cytoplasmic
O31751	uppS	Isoprenyl transferase (EC 2.5.1.-)			Cytoplasmic	0	0			@Intracellular	Cytoplasmic
O34309	pps	Putative phosphoenolpyruvate synthase (Putative PEP synthase) (Pyruvate, water dikinase)		Yes	CytoplasmicMembrane	0	0			@Intracellular	Cytoplasmic
P19465	folE	GTP cyclohydrolase 1 (EC 3.5.4.16) (GTP cyclohydrolase I) (GTP-CH-I)			Cytoplasmic	0	0			@Intracellular	Cytoplasmic
P39604	rodA	Rod shape-determining protein RodA		Yes	CytoplasmicMembrane	10	0			@Multi-transmembrane	Membrane	GO:0016021|IPR018365|IPR001182|PS00428|PF01098|PTHR30474
P71084	gsaB	Glutamate-1-semialdehyde 2,1-aminomutase 2 (GSA 2) (EC 5.4.3.8) (Glutamate-1-semialdehyde aminotransferase 2) (GSA-AT 2)			Cytoplasmic	0	0			@Intracellular	Cytoplasmic
O34641	ytrB	ABC transporter ATP-binding protein YtrB		Yes	CytoplasmicMembrane	0	0			@Intracellular	Cytoplasmic
P20277	rplQ	50S ribosomal protein L17 (BL15) (BL21)			Cytoplasmic	0	0			@Intracellular	Cytoplasmic
P21656	trpS	Tryptophan--tRNA ligase (EC 6.1.1.2) (Tryptophanyl-tRNA synthetase) (TrpRS)			Cytoplasmic	0	0			@Intracellular	Cytoplasmic
P32397	hemY	Protoporphyrinogen oxidase (PPO) (EC 1.3.3.4)		Yes	CytoplasmicMembrane	1	0			@N-terminally anchored (No CS)	Membrane
Q06753	yacO	Putative TrmH family tRNA/rRNA methyltransferase YacO (EC 2.1.1.-)			Cytoplasmic	0	0			@Intracellular	Cytoplasmic
O31796	hfq	RNA-binding protein Hfq			Cytoplasmic	0	0			@Intracellular	Cytoplasmic
P25811	mnmE	tRNA modification GTPase MnmE (EC 3.6.-.-)			Cytoplasmic	0	0			@Intracellular	Cytoplasmic
P80860	pgi	Glucose-6-phosphate isomerase (GPI) (EC 5.3.1.9) (Phosphoglucose isomerase) (PGI) (Phosphohexose isomerase) (PHI) (Vegetative protein 54) (VEG54)			Cytoplasmic	0	0			@Intracellular	Cytoplasmic
O06741	yitF	Putative isomerase YitF (EC 5.-.-.-)	sigG		Unknown	0	0			@Intracellular	Cytoplasmic
P21477	rpsT	30S ribosomal protein S20 (BS20)			Cytoplasmic	0	0			@Intracellular	Cytoplasmic
Q01620	jag	Protein jag (SpoIIIJ-associated protein)			Cytoplasmic	0	0			@Intracellular	Cytoplasmic
Q03523	murE	UDP-N-acetylmuramoyl-L-alanyl-D-glutamate--2,6-diaminopimelate ligase (EC 6.3.2.13) (Meso-A2pm-adding enzyme) (Meso-diaminopimelate-adding enzyme) (UDP-MurNAc-L-Ala-D-Glu:meso-diaminopimelate ligase) (UDP-MurNAc-tripeptide synthetase) (UDP-N-acetylmuramyl-tripeptide synthetase)			Cytoplasmic	0	0			@Intracellular	Cytoplasmic
O34533	ytcD	Uncharacterized HTH-type transcriptional regulator YtcD			Cytoplasmic	0	0			@Intracellular	Cytoplasmic
O34592	ydjP	AB hydrolase superfamily protein YdjP (EC 3.-.-.-)	sigE		Unknown	0	0			@Intracellular	Cytoplasmic
P10725	alr1	Alanine racemase 1 (EC 5.1.1.1)			Cytoplasmic	0	0			@Intracellular	Cytoplasmic
P37512	yyaL	Uncharacterized protein YyaL			Cytoplasmic	0	0			@Intracellular	Cytoplasmic
P37876	ytxK	Uncharacterized protein YtxK			Cytoplasmic	0	0			@Intracellular	Cytoplasmic
P42084	hutI	Imidazolonepropionase (EC 3.5.2.7) (Imidazolone-5-propionate hydrolase)			Cytoplasmic	0	0			@Intracellular	Cytoplasmic
O34340	fabF	3-oxoacyl-[acyl-carrier-protein] synthase 2 (EC 2.3.1.179) (3-oxoacyl-[acyl-carrier-protein] synthase II) (Beta-ketoacyl-ACP synthase II) (KAS II)		Yes	CytoplasmicMembrane	0	Y			@Intracellular	Cytoplasmic
P14802	yoxD	Uncharacterized oxidoreductase YoxD (EC 1.-.-.-)			Cytoplasmic	0	0			@Intracellular	Cytoplasmic
O34654	yodI	Uncharacterized protein YodI	sigK	Yes	CytoplasmicMembrane	1	0			@N-terminally anchored (No CS)	Membrane	PD710533
O31503	rlmCD	23S rRNA (uracil-C(5))-methyltransferase RlmCD (EC 2.1.1.189) (EC 2.1.1.190) (23S rRNA (uracil(1939)-C(5))-methyltransferase) (23S rRNA (uracil(747)-C(5))-methyltransferase)			Cytoplasmic	0	0			@Intracellular	Cytoplasmic
O34751	yloV	Uncharacterized protein YloV			Unknown	0	0			@Intracellular	Cytoplasmic
P17731	hisC	Histidinol-phosphate aminotransferase (EC 2.6.1.9) (Imidazole acetol-phosphate transaminase)			Cytoplasmic	0	0			@Intracellular	Cytoplasmic
P21473	rpsO	30S ribosomal protein S15 (BS18)			Cytoplasmic	0	0			@Intracellular	Cytoplasmic
P53001	aspB	Aspartate aminotransferase (AspAT) (EC 2.6.1.1) (Transaminase A)			Cytoplasmic	0	Y			@Secretory(released) (with CS)	Extracellular
O31614	prpE	Bis(5'-nucleosyl)-tetraphosphatase PrpE [asymmetrical] (EC 3.6.1.17) (Ap4A hydrolase) (Diadenosine 5',5'''-P1,P4-tetraphosphate asymmetrical hydrolase) (Diadenosine tetraphosphatase)			Cytoplasmic	0	0			@Intracellular	Cytoplasmic
O34558	yopR	SPBc2 prophage-derived uncharacterized protein YopR			Cytoplasmic	0	0			@Intracellular	Cytoplasmic
P21885	speA	Arginine decarboxylase (EC 4.1.1.19)			Cytoplasmic	0	0			@Intracellular	Cytoplasmic
P54604	yhcT	Uncharacterized RNA pseudouridine synthase YhcT (EC 5.4.99.-) (RNA pseudouridylate synthase) (RNA-uridine isomerase)			Cytoplasmic	0	0			@Intracellular	Cytoplasmic
P55872	infC	Translation initiation factor IF-3			Cytoplasmic	0	0			@Intracellular	Cytoplasmic
P54472	yqfO	Putative GTP cyclohydrolase 1 type 2 (EC 3.5.4.16) (GTP cyclohydrolase I)			Cytoplasmic	0	0			@Intracellular	Cytoplasmic
P37568	ctsR	Transcriptional regulator CtsR (Class three stress gene repressor)			Cytoplasmic	0	0			@Intracellular	Cytoplasmic
Q06796	rplK	50S ribosomal protein L11 (BL11)			Cytoplasmic	0	0			@Intracellular	Cytoplasmic
O05516	tsaB	tRNA threonylcarbamoyladenosine biosynthesis protein TsaB (t(6)A37 threonylcarbamoyladenosine biosynthesis protein TsaB)		Yes	CytoplasmicMembrane	0	0			@Intracellular	Cytoplasmic
O34981	dapH	2,3,4,5-tetrahydropyridine-2,6-dicarboxylate N-acetyltransferase (EC 2.3.1.89) (Tetrahydrodipicolinate N-acetyltransferase) (THP acetyltransferase) (Tetrahydropicolinate acetylase)			Cytoplasmic	0	0			@Intracellular	Cytoplasmic
O35043	yfkC	Uncharacterized MscS family protein YfkC		Yes	CytoplasmicMembrane	3	0			@Multi-transmembrane	Membrane	GO:0016020|IPR006685|IPR011014|PF00924|SSF82861
O34599	iscS1	Putative cysteine desulfurase IscS 1 (EC 2.8.1.7)			Cytoplasmic	0	0			@Intracellular	Cytoplasmic
P18579	murB	UDP-N-acetylenolpyruvoylglucosamine reductase (EC 1.3.1.98) (UDP-N-acetylmuramate dehydrogenase)	sigE		Cytoplasmic	0	0			@Intracellular	Cytoplasmic
P16971	recA	Protein RecA (Recombinase A)			Cytoplasmic	0	0			@Intracellular	Cytoplasmic
O31795	miaA	tRNA dimethylallyltransferase (EC 2.5.1.75) (Dimethylallyl diphosphate:tRNA dimethylallyltransferase) (DMAPP:tRNA dimethylallyltransferase) (DMATase) (Isopentenyl-diphosphate:tRNA isopentenyltransferase) (IPP transferase) (IPPT) (IPTase)			Unknown	0	0			@Intracellular	Cytoplasmic
P0CI73	glmS	Glutamine--fructose-6-phosphate aminotransferase [isomerizing] (EC 2.6.1.16) (D-fructose-6-phosphate amidotransferase) (GFAT) (Glucosamine-6-phosphate synthase) (Hexosephosphate aminotransferase) (L-glutamine--D-fructose-6-phosphate amidotransferase)			Cytoplasmic	0	0			@Intracellular	Cytoplasmic
P39840	galM	Aldose 1-epimerase (EC 5.1.3.3) (Galactose mutarotase)			Cytoplasmic	0	0			@Intracellular	Cytoplasmic
P42962	ycsE	Putative phosphatase YcsE (EC 3.1.3.-)		Yes	Cytoplasmic	0	0			@Intracellular	Cytoplasmic	GO:0016021|IPR001757|PR00119
O32054	queA	S-adenosylmethionine:tRNA ribosyltransferase-isomerase (EC 2.4.99.17) (Queuosine biosynthesis protein QueA)			Cytoplasmic	0	0			@Intracellular	Cytoplasmic
P21471	rpsJ	30S ribosomal protein S10 (BS13)			Cytoplasmic	0	0			@Intracellular	Cytoplasmic
P50620	nrdE	Ribonucleoside-diphosphate reductase subunit alpha (EC 1.17.4.1) (Ribonucleotide reductase large subunit)			Cytoplasmic	0	0			@Intracellular	Cytoplasmic
O34782	yvrD	Uncharacterized oxidoreductase YvrD (EC 1.-.-.-)			Cytoplasmic	0	0			@Intracellular	Cytoplasmic
O06994	malL	Oligo-1,6-glucosidase 1 (EC 3.2.1.10) (Dextrin 6-alpha-D-glucanohydrolase) (Oligosaccharide alpha-1,6-glucosidase 1) (Sucrase-isomaltase 1) (Isomaltase 1)			Cytoplasmic	0	0			@Intracellular	Cytoplasmic
O31612	ppnK1	Probable inorganic polyphosphate/ATP-NAD kinase 1 (Poly(P)/ATP NAD kinase 1) (EC 2.7.1.23)			Cytoplasmic	0	0			@Intracellular	Cytoplasmic
P37887	cysK	Cysteine synthase (CSase) (EC 2.5.1.47) (O-acetylserine (thiol)-lyase) (OAS-TL) (Superoxide-inducible protein 11) (SOI11)			Cytoplasmic	0	0			@Intracellular	Cytoplasmic
P39138	rocF	Arginase (EC 3.5.3.1)			Cytoplasmic	0	0			@Intracellular	Cytoplasmic
Q45597	fbp	Fructose-1,6-bisphosphatase class 3 (FBPase class 3) (EC 3.1.3.11) (D-fructose-1,6-bisphosphate 1-phosphohydrolase class 3)			Cytoplasmic	0	0			@Intracellular	Cytoplasmic
O31778	miaB	(Dimethylallyl)adenosine tRNA methylthiotransferase MiaB (EC 2.-.-.-) (tRNA-i(6)A37 methylthiotransferase)			Cytoplasmic	0	0			@Intracellular	Cytoplasmic
P17893	argR	Arginine repressor (Arginine hydroxamate resistance protein)			Cytoplasmic	0	0			@Intracellular	Cytoplasmic
P54418	pckA	Phosphoenolpyruvate carboxykinase [ATP] (PCK) (PEP carboxykinase) (PEPCK) (EC 4.1.1.49) (Phosphoenolpyruvate carboxylase)			Cytoplasmic	0	0			@Intracellular	Cytoplasmic
P39645	ywfI	UPF0447 protein YwfI			Cytoplasmic	0	0			@Intracellular	Cytoplasmic
P46898	rplF	50S ribosomal protein L6 (BL10)			Cytoplasmic	0	0			@Intracellular	Cytoplasmic
P26902	dppA	D-aminopeptidase (EC 3.4.11.-)		Yes	CytoplasmicMembrane	0	0			@Intracellular	Cytoplasmic
P80862	serC	Phosphoserine aminotransferase (EC 2.6.1.52) (Phosphohydroxythreonine aminotransferase) (PSAT) (Vegetative protein 234) (VEG234)			Cytoplasmic	0	0			@Intracellular	Cytoplasmic
O34328	gmk	Guanylate kinase (EC 2.7.4.8) (GMP kinase)			Cytoplasmic	0	Y			@Intracellular	Cytoplasmic
P12874	rpsQ	30S ribosomal protein S17 (BS16)			Cytoplasmic	0	0			@Intracellular	Cytoplasmic
P96666	ydeI	Uncharacterized protein YdeI			Cytoplasmic	0	0			@Intracellular	Cytoplasmic
P54164	ypeP	Uncharacterized protein YpeP			Unknown	0	0			@Intracellular	Cytoplasmic
P54952	yxeM	Probable amino-acid-binding protein YxeM		Yes	Unknown	0	Y		Yes	@Lipid anchored	Extracellular	PS51257
O34629	yerH	Uncharacterized lipoprotein YerH		Yes	Unknown	0	Y		Yes	@Lipid anchored	Extracellular	PS51257
P16450	gerD	Spore germination protein GerD	sigF|sigG	Yes	Unknown	0	Y		Yes	@Lipid anchored	Extracellular	PS51257
O34525	sppA	Putative signal peptide peptidase SppA (EC 3.4.21.-)		Yes	CytoplasmicMembrane	1	0			@N-terminally anchored (with CS)	Membrane
O34348	yfmC	Fe(3+)-citrate-binding protein YfmC (Ferric-citrate-binding protein)		Yes	CytoplasmicMembrane	0	Y		Yes	@Lipid anchored	Extracellular	PS51257
P96697	ydfS	UPF0702 transmembrane protein YdfS	sigG	Yes	CytoplasmicMembrane	3	0			@Multi-transmembrane	Membrane
O34586	ylbC	Uncharacterized membrane protein YlbC	sigF	Yes	Unknown	1	0			@N-terminally anchored (No CS)	Membrane
P35162	resC	Cytochrome c biogenesis protein ResC		Yes	CytoplasmicMembrane	10	0			@Multi-transmembrane	Membrane
O34758	yrrL	UPF0755 protein YrrL		Yes	Unknown	1	0			@N-terminally anchored (No CS)	Membrane
P42409	rsbRA	RsbT co-antagonist protein RsbRA (Stressosome protein RsbRA)		Yes	Cytoplasmic	0	0			@Intracellular	Cytoplasmic	PD936484
P94366	cydC	ATP-binding/permease protein CydC		Yes	CytoplasmicMembrane	4	Y			@Multi-transmembrane	Membrane	GO:0016021|GO:0016020|IPR011527|IPR014216|PF00664|SSF90123|TIGR02857|PS50929
O34624	yebE	UPF0316 protein YebE		Yes	CytoplasmicMembrane	3	0			@Multi-transmembrane	Membrane
Q45612	yycI	Two-component system YycFG regulatory protein		Yes	Unknown	1	0			@N-terminally anchored (No CS)	Membrane	GO:0016021|IPR018604|PF09648
P96596	ydbA	Uncharacterized protein YdbA			Cytoplasmic	0	0			@Intracellular	Cytoplasmic
O34353	ydjN	Uncharacterized protein YdjN			Unknown	0	Y			@Secretory(released) (with CS)	Extracellular
P42312	nupG	Purine nucleoside transport protein NupG		Yes	CytoplasmicMembrane	11	Y			@Multi-transmembrane(Lipid modified N-termini)	Membrane	GO:0016020|IPR018270|IPR008276|TIGR00804|PTHR10590
P54488	yqgF	Uncharacterized protein YqgF		Yes	CytoplasmicMembrane	1	0			@N-terminally anchored (No CS)	Membrane
P94593	ywqA	Uncharacterized ATP-dependent helicase YwqA (EC 3.6.4.-)		Yes	CytoplasmicMembrane	0	0			@Intracellular	Cytoplasmic
O34493	ytmA	Uncharacterized peptidase YtmA (EC 3.4.21.-)			Unknown	0	0			@Intracellular	Cytoplasmic
O31671	kinD	Sporulation kinase D (EC 2.7.13.3) (Sensor histidine kinase D)		Yes	CytoplasmicMembrane	2	0			@Multi-transmembrane	Membrane	GO:0016020|IPR003661|SM00388|PF00512|G3DSA:1.10.287.130
P55340	ecsB	Protein EcsB		Yes	CytoplasmicMembrane	10	0			@Multi-transmembrane	Membrane	GO:0016021|IPR010288|PIRSF037259|PF05975
P37948	glpT	Glycerol-3-phosphate transporter (G-3-P transporter) (G-3-P permease)		Yes	CytoplasmicMembrane	12	0			@Multi-transmembrane	Membrane	GO:0016021|IPR021159|IPR005267|IPR000849|IPR011701|PS00942|TIGR00712|TIGR00881|PF07690|PIRSF002808
P54493	gluP	Rhomboid protease GluP (EC 3.4.21.105) (Intramembrane serine protease)		Yes	CytoplasmicMembrane	7	0			@Multi-transmembrane	Membrane	GO:0016021|IPR022764|IPR002610|G3DSA:1.20.1540.10|PF01694|PTHR22936
O31582	yfhO	Uncharacterized protein YfhO		Yes	CytoplasmicMembrane	13	Y			@Multi-transmembrane	Membrane	IPR018580|PF09586
P71082	ygaD	Putative multidrug export ATP-binding/permease protein YgaD (EC 3.6.3.-)		Yes	CytoplasmicMembrane	5	0			@Multi-transmembrane	Membrane	GO:0016021|IPR011527|PF00664|SSF90123|PS50929
O06725	yisL	UPF0344 protein YisL		Yes	CytoplasmicMembrane	4	0			@Multi-transmembrane	Membrane	IPR010899|PD067392
P39578	dltD	Protein DltD		Yes	Unknown	0	Y			@N-terminally anchored (No CS)	Membrane
P94520	ysdB	Sigma-w pathway protein YsdB		Yes	CytoplasmicMembrane	1	0			@N-terminally anchored (No CS)	Membrane
P40750	pbpD	Penicillin-binding protein 4 (PBP 4)		Yes	CytoplasmicMembrane	0	Y	1		@N-terminally anchored (No CS)	Membrane
P40948	corA	Magnesium transport protein CorA		Yes	CytoplasmicMembrane	2	0			@Multi-transmembrane	Membrane	GO:0016020|IPR002523|PF01544
O34741	bceB	Bacitracin export permease protein BceB		Yes	CytoplasmicMembrane	10	0			@Multi-transmembrane	Membrane	GO:0016020|IPR003838|PF02687
P54467	yqfB	Uncharacterized protein YqfB		Yes	CytoplasmicMembrane	1	0			@N-terminally anchored (No CS)	Membrane
O34990	purU	Formyltetrahydrofolate deformylase (EC 3.5.1.10) (Formyl-FH(4) hydrolase)			Cytoplasmic	0	0			@Intracellular	Cytoplasmic
Q45068	alsT	Amino-acid carrier protein AlsT		Yes	CytoplasmicMembrane	11	0			@Multi-transmembrane	Membrane	GO:0016020|IPR001463|PR00175|PF01235|PTHR30330|PS00873|TIGR00835
Q795M6	yugH	Putative aminotransferase YugH (EC 2.6.1.-)			Cytoplasmic	0	0			@Intracellular	Cytoplasmic
P12011	gntK	Gluconokinase (EC 2.7.1.12) (Gluconate kinase)			Cytoplasmic	0	0			@Intracellular	Cytoplasmic
P94408	yclF	Uncharacterized transporter YclF		Yes	CytoplasmicMembrane	13	0			@Multi-transmembrane	Membrane	GO:0016020|IPR005279|IPR000109|IPR018456|TIGR00924|PTHR11654|PS01023|PF00854|PS01022
O06986	yvdD	LOG family protein YvdD			Cytoplasmic	0	0			@Intracellular	Cytoplasmic
C0SP95	ycnJ	Copper transport protein YcnJ		Yes	CytoplasmicMembrane	8	Y			@Multi-transmembrane	Membrane	GO:0016021|IPR008457|PF05425
P54178	ypmQ	SCO1 protein homolog (BsSco)		Yes	CytoplasmicMembrane	0	Y		Yes	@N-terminally anchored (No CS)	Membrane	PS51257
Q45514	sapB	Protein SapB		Yes	CytoplasmicMembrane	5	0			@Multi-transmembrane	Membrane	GO:0016020|IPR003416|PF02308|PR01837
P39610	pdxK	Pyridoxine kinase (EC 2.7.1.35) (PN/PL/PM kinase) (Pyridoxal kinase) (Pyridoxamine kinase) (Vitamin B6 kinase)			Cytoplasmic	0	0			@Intracellular	Cytoplasmic
O31712	yknZ	Uncharacterized ABC transporter permease YknZ		Yes	CytoplasmicMembrane	4	0			@Multi-transmembrane	Membrane	GO:0016020|IPR003838|PF02687
P23715	argC	N-acetyl-gamma-glutamyl-phosphate reductase (AGPR) (EC 1.2.1.38) (N-acetyl-glutamate semialdehyde dehydrogenase) (NAGSA dehydrogenase)			Cytoplasmic	0	0			@Intracellular	Cytoplasmic
O31829	yoaF	Uncharacterized protein YoaF			Unknown	0	Y			@Intracellular	Cytoplasmic
O34827	ykuM	Uncharacterized HTH-type transcriptional regulator YkuM			Cytoplasmic	0	0			@Intracellular	Cytoplasmic
O34305	ytoQ	Uncharacterized protein YtoQ			Cytoplasmic	0	0			@Intracellular	Cytoplasmic
P31114	hepT	Heptaprenyl diphosphate synthase component 2 (HepPP synthase subunit 2) (EC 2.5.1.30) (Spore germination protein C3)			Cytoplasmic	0	0			@Intracellular	Cytoplasmic
O05255	yufQ	Uncharacterized ABC transporter permease protein YufQ		Yes	CytoplasmicMembrane	9	0			@Multi-transmembrane	Membrane	GO:0016020|IPR001851|PF02653
P96706	ydgH	Putative membrane protein YdgH		Yes	CytoplasmicMembrane	11	Y			@Multi-transmembrane	Membrane	GO:0016020|GO:0016021|IPR004869|IPR000731|PF03176|PS50156
O31675	queC	7-cyano-7-deazaguanine synthase (EC 6.3.4.20) (7-cyano-7-carbaguanine synthase) (PreQ(0) synthase) (Queuosine biosynthesis protein QueC)			Cytoplasmic	0	0			@Intracellular	Cytoplasmic
O34691	naiP	Putative niacin/nicotinamide transporter NaiP		Yes	CytoplasmicMembrane	12	0			@Multi-transmembrane	Membrane	GO:0016021|IPR005829|IPR011701|PS00217|PF07690
O06991	mdxG	Maltodextrin transport system permease protein MdxG		Yes	CytoplasmicMembrane	6	0			@Multi-transmembrane	Membrane	GO:0016020|IPR000515|PF00528|PS50928|SSF161098|G3DSA:1.10.3720.10
P39765	pyrR	Bifunctional protein PyrR [Includes: Pyrimidine operon regulatory protein; Uracil phosphoribosyltransferase (UPRTase) (EC 2.4.2.9)]			Cytoplasmic	0	0			@Intracellular	Cytoplasmic
P39788	nth	Endonuclease III (EC 4.2.99.18) (DNA-(apurinic or apyrimidinic site) lyase)			Cytoplasmic	0	0			@Intracellular	Cytoplasmic
Q08313	cotX	Spore coat protein X	sigK		Cytoplasmic	0	0			@Intracellular	Cytoplasmic
O34495	ykoP	Uncharacterized protein YkoP			Unknown	0	0			@Intracellular	Cytoplasmic
O34753	tagO	Probable undecaprenyl-phosphate N-acetylglucosaminyl 1-phosphate transferase (EC 2.7.8.33) (UDP-GlcNAc:undecaprenyl-phosphate GlcNAc-1-phosphate transferase) (Undecaprenyl-Phosphate GlcNAc-1-phosphate transferase)		Yes	CytoplasmicMembrane	11	0			@Multi-transmembrane	Membrane	GO:0016021|IPR000715|PTHR22926|PF00953
O06967	bmrA	Multidrug resistance ABC transporter ATP-binding/permease protein BmrA (EC 3.6.3.-)		Yes	CytoplasmicMembrane	6	0			@Multi-transmembrane	Membrane	GO:0016021|IPR011527|PF00664|SSF90123|PS50929
P09122	dnaX	DNA polymerase III subunit gamma/tau (EC 2.7.7.7)			Cytoplasmic	0	0			@Intracellular	Cytoplasmic
P06629	ywjG	Uncharacterized protein YwjG			Cytoplasmic	0	0			@Intracellular	Cytoplasmic
O31823	yngC	Uncharacterized membrane protein YngC		Yes	CytoplasmicMembrane	5	0			@Multi-transmembrane	Membrane
P68569	bdbA	SPBc2 prophage-derived disulfide bond formation protein A (Disulfide oxidoreductase A) (Thiol-disulfide oxidoreductase A)		Yes	Extracellular	0	Y			@N-terminally anchored (No CS)	Membrane
P54538	yqjA	Uncharacterized protein YqjA		Yes	CytoplasmicMembrane	5	0			@Multi-transmembrane	Membrane
O34437	yfkH	Putative ribonuclease-like protein YfkH		Yes	CytoplasmicMembrane	6	0			@Multi-transmembrane	Membrane	IPR017039|TIGR00765
Q45479	lspA	Lipoprotein signal peptidase (EC 3.4.23.36) (Prolipoprotein signal peptidase) (Signal peptidase II) (SPase II)		Yes	CytoplasmicMembrane	3	0			@Multi-transmembrane	Membrane	GO:0016020|IPR001872|PS00855|PR00781|PF01252|TIGR00077|MF_00161
P23630	lysA	Diaminopimelate decarboxylase (DAP decarboxylase) (DAPDC) (EC 4.1.1.20)	sigG		Cytoplasmic	0	0			@Intracellular	Cytoplasmic
P37545	yabD	Uncharacterized deoxyribonuclease YabD (EC 3.1.21.-)			Cytoplasmic	0	0			@Intracellular	Cytoplasmic
P42422	yxdK	Sensor histidine kinase YxdK (EC 2.7.13.3)		Yes	CytoplasmicMembrane	2	0			@Multi-transmembrane	Membrane
P94383	ycgH	Uncharacterized transporter YcgH		Yes	CytoplasmicMembrane	12	0			@Multi-transmembrane(Lipid modified N-termini)	Membrane	GO:0016020|IPR002293|IPR004841|PIRSF006060|PS51257|PTHR11785|PF00324
O07603	yhfE	Putative aminopeptidase YhfE (EC 3.4.11.-)			Cytoplasmic	0	0			@Intracellular	Cytoplasmic
P37526	yaaC	Uncharacterized protein YaaC		Yes	CytoplasmicMembrane	0	0			@Intracellular	Cytoplasmic
P70995	ywhC	Putative zinc metalloprotease YwhC (EC 3.4.24.-)		Yes	CytoplasmicMembrane	5	0			@Multi-transmembrane	Membrane
Q05470	pksL	Polyketide synthase PksL (PKS)		Yes	CytoplasmicMembrane	0	0			@Intracellular	Cytoplasmic
O31502	dagK	Diacylglycerol kinase (DAG kinase) (DAGK) (EC 2.7.1.107)			Cytoplasmic	0	0			@Intracellular	Cytoplasmic
O34512	yfmM	Uncharacterized ABC transporter ATP-binding protein YfmM (EC 3.6.3.-)			Cytoplasmic	0	0			@Intracellular	Cytoplasmic
P49849	mutS	DNA mismatch repair protein MutS			Cytoplasmic	0	0			@Intracellular	Cytoplasmic
O31776	tdh	L-threonine 3-dehydrogenase (EC 1.1.1.103)			Cytoplasmic	0	0			@Intracellular	Cytoplasmic
O34916	ykuR	N-acetyldiaminopimelate deacetylase (EC 3.5.1.47)			Cytoplasmic	0	0			@Intracellular	Cytoplasmic
P39761	adeC	Adenine deaminase (Adenase) (Adenine aminase) (EC 3.5.4.2)			Cytoplasmic	0	0			@Intracellular	Cytoplasmic
P39593	thiM	Hydroxyethylthiazole kinase (EC 2.7.1.50) (4-methyl-5-beta-hydroxyethylthiazole kinase) (TH kinase) (Thz kinase)			Cytoplasmic	0	0			@Intracellular	Cytoplasmic
O34411	hisK	Histidinol-phosphatase (HolPase) (EC 3.1.3.15)			Cytoplasmic	0	0			@Intracellular	Cytoplasmic
P16524	patA	Putative N-acetyl-LL-diaminopimelate aminotransferase (EC 2.6.1.-) (Putative aminotransferase A)			Cytoplasmic	0	0			@Intracellular	Cytoplasmic
P12946	ctaA	Heme A synthase (HAS) (EC 1.3.-.-) (Cytochrome aa3-controlling protein)	sigE	Yes	CytoplasmicMembrane	8	0			@Multi-transmembrane	Membrane	GO:0016020|GO:0016021|IPR023755|IPR003780|MF_01664|PF02628
P54533	bfmBC	Dihydrolipoyl dehydrogenase (EC 1.8.1.4) (Dihydrolipoamide dehydrogenase) (E3 component of branched-chain alpha-keto acid dehydrogenase complex) (LPD-Val)			Cytoplasmic	0	0			@Intracellular	Cytoplasmic
O31657	htpX	Protease HtpX homolog (EC 3.4.24.-)		Yes	CytoplasmicMembrane	4	0			@Multi-transmembrane	Membrane	GO:0016020|IPR001915|PF01435
P42964	ycsG	Uncharacterized membrane protein YcsG		Yes	CytoplasmicMembrane	11	0			@Multi-transmembrane	Membrane	GO:0016020|IPR001046|PTHR11706|PF01566
P35161	resB	Cytochrome c biogenesis protein ResB		Yes	CytoplasmicMembrane	4	0			@Multi-transmembrane	Membrane
P54396	ypmB	Uncharacterized protein YpmB		Yes	CytoplasmicMembrane	0	Y			@N-terminally anchored (with CS)	Membrane
Q795M8	yugO	Putative potassium channel protein YugO		Yes	CytoplasmicMembrane	3	0			@Multi-transmembrane	Membrane
O32193	cssS	Sensor histidine kinase CssS (EC 2.7.13.3)		Yes	CytoplasmicMembrane	2	0			@Multi-transmembrane	Membrane	GO:0016021|GO:0016020|IPR003660|IPR003661|PF00672|G3DSA:1.10.287.130|PS50885|SM00304|PF00512|SM00388
P96704	ydgF	Uncharacterized transporter YdgF		Yes	CytoplasmicMembrane	12	0			@Multi-transmembrane	Membrane	GO:0016020|GO:0016021|IPR002293|IPR004841|IPR004840|PIRSF006060|PTHR11785|PF00324|PS00218
Q45064	plsY	Glycerol-3-phosphate acyltransferase (Acyl-PO4 G3P acyltransferase) (Acyl-phosphate--glycerol-3-phosphate acyltransferase) (G3P acyltransferase) (GPAT) (EC 2.3.1.n3) (Lysophosphatidic acid synthase) (LPA synthase)		Yes	CytoplasmicMembrane	3	Y			@Multi-transmembrane	Membrane	GO:0005886|IPR003811|PF02660|PTHR30309:SF0|MF_01043|TIGR00023
O34472	yrrI	UPF0118 membrane protein YrrI		Yes	CytoplasmicMembrane	8	0			@Multi-transmembrane	Membrane
P42412	iolA	Methylmalonate semialdehyde dehydrogenase [acylating] (MMSA dehydrogenase) (MMSDH) (MSDH) (EC 1.2.1.27) (Malonate semialdehyde dehydrogenase [acetylating]) (MSA dehydrogenase) (EC 1.2.1.18)			Cytoplasmic	0	0			@Intracellular	Cytoplasmic
P94431	ycnI	Uncharacterized protein YcnI		Yes	CytoplasmicMembrane	1	Y			@C-terminally anchored (with CS)	Membrane
O34318	yloU	Uncharacterized protein YloU			Cytoplasmic	0	0			@Intracellular	Cytoplasmic
O32198	liaS	Sensor histidine kinase LiaS (EC 2.7.13.3)		Yes	CytoplasmicMembrane	2	0			@Multi-transmembrane	Membrane	GO:0016021|IPR003660|IPR017202|IPR011712|PF00672|PIRSF037431|PF07730|SM00304|PS50885
P39791	yppC	Uncharacterized protein YppC (ORFX)		Yes	CytoplasmicMembrane	0	0			@Intracellular	Cytoplasmic
P12012	gntP	Gluconate permease		Yes	CytoplasmicMembrane	11	Y			@Multi-transmembrane	Membrane	GO:0016020|IPR003474|PTHR30354:SF1|PIRSF002746|TIGR00791|PF02447
O31761	ymfC	Uncharacterized HTH-type transcriptional regulator YmfC			Cytoplasmic	0	0			@Intracellular	Cytoplasmic
P50733	ypbG	Uncharacterized protein YpbG			Cytoplasmic	0	Y			@Secretory(released) (with CS)	Extracellular
C0H445	ypzH	Uncharacterized protein YpzH			Unknown	0	0			@Intracellular	Cytoplasmic
O34344	sdpC	Killing factor SdpC (Toxic peptide SdpC)		Yes	Unknown	0	Y			@Multi-transmembrane	Membrane
Q9K2S2	mrpA	Na(+)/H(+) antiporter subunit A (Mrp complex subunit A) (Multiple resistance and pH homeostasis protein A)		Yes	CytoplasmicMembrane	21	0			@Multi-transmembrane	Membrane	IPR001750|PF00361
O32272	tuaC	Putative teichuronic acid biosynthesis glycosyltransferase TuaC (EC 2.4.-.-)			Cytoplasmic	0	0			@Intracellular	Cytoplasmic
O05525	ydiL	Putative membrane peptidase YdiL (EC 3.4.-.-)		Yes	CytoplasmicMembrane	7	0			@Multi-transmembrane	Membrane	GO:0016020|IPR003675|PF02517
P21470	rpsI	30S ribosomal protein S9 (BS10)			Cytoplasmic	0	0			@Intracellular	Cytoplasmic
O32064	ytzA	UPF0716 protein YtzA		Yes	CytoplasmicMembrane	3	Y			@Multi-transmembrane	Membrane	GO:0016020|IPR007313|PF04186
P45913	yqaP	Uncharacterized protein YqaP			Cytoplasmic	0	0			@Intracellular	Cytoplasmic
P70947	yitU	Putative phosphatase YitU (EC 3.1.3.-)			Cytoplasmic	0	0			@Intracellular	Cytoplasmic
P42095	recO	DNA repair protein RecO (Recombination protein O)			Cytoplasmic	0	0			@Intracellular	Cytoplasmic
P55341	ecsC	Protein EcsC			Unknown	0	0			@Intracellular	Cytoplasmic
O34483	hprK	HPr kinase/phosphorylase (HPrK/P) (EC 2.7.11.-) (EC 2.7.4.-) (HPr kinase/phosphatase) (HPr(Ser) kinase/phosphorylase)			Cytoplasmic	0	0			@Intracellular	Cytoplasmic
O31433	ybdK	Sensor histidine kinase YbdK (EC 2.7.13.3)		Yes	Cytoplasmic	1	Y			@Multi-transmembrane	Membrane	GO:0016020|GO:0016021|IPR003661|IPR003660|PF00512|SM00388|PS50885|PF00672|G3DSA:1.10.287.130|SM00304
O31727	ylmE	UPF0001 protein YlmE			Cytoplasmic	0	0			@Intracellular	Cytoplasmic
P32399	yhgE	Uncharacterized protein YhgE (ORFB)		Yes	CytoplasmicMembrane	6	0			@Multi-transmembrane	Membrane
O32157	frlB	Fructosamine deglycase FrlB (EC 3.5.-.-)			Cytoplasmic	0	0			@Intracellular	Cytoplasmic
P38494	ypfD	30S ribosomal protein S1 homolog			Cytoplasmic	0	0			@Intracellular	Cytoplasmic
O32224	azoR2	FMN-dependent NADH-azoreductase 2 (EC 1.7.-.-) (Azo-dye reductase 2) (FMN-dependent NADH-azo compound oxidoreductase 2)	sigG		Unknown	0	0			@Intracellular	Cytoplasmic
P80879	dps	General stress protein 20U (GSP20U) (DPS protein homolog)			Cytoplasmic	0	0			@Intracellular	Cytoplasmic
P14016	cotE	Spore coat protein E	sigE|sigK		Cytoplasmic	0	0			@Intracellular	Cytoplasmic
P54542	yqjE	Uncharacterized protein YqjE			Cytoplasmic	0	0			@Intracellular	Cytoplasmic
P54375	sodA	Superoxide dismutase [Mn] (EC 1.15.1.1) (General stress protein 24) (GSP24)			Extracellular	0	0			@Intracellular	Cytoplasmic
P12048	purH	Bifunctional purine biosynthesis protein PurH [Includes: Phosphoribosylaminoimidazolecarboxamide formyltransferase (EC 2.1.2.3) (AICAR transformylase); IMP cyclohydrolase (EC 3.5.4.10) (ATIC) (IMP synthase) (Inosinicase)]			Cytoplasmic	0	0			@Intracellular	Cytoplasmic
O31489	ydcI	Uncharacterized protein YdcI			Cytoplasmic	0	0			@Intracellular	Cytoplasmic
P37472	hprT	Hypoxanthine-guanine phosphoribosyltransferase (HGPRT) (HGPRTase) (EC 2.4.2.8)			Cytoplasmic	0	0			@Intracellular	Cytoplasmic
O31629	yjcG	UPF0477 protein YjcG			Cytoplasmic	0	0			@Intracellular	Cytoplasmic
O34475	yfkO	Putative NAD(P)H nitroreductase YfkO (EC 1.-.-.-)			Cytoplasmic	0	0			@Intracellular	Cytoplasmic
P94400	yciC	Putative metal chaperone YciC			Cytoplasmic	0	0			@Intracellular	Cytoplasmic
P46906	argS	Arginine--tRNA ligase (EC 6.1.1.19) (Arginyl-tRNA synthetase) (ArgRS)			Cytoplasmic	0	0			@Intracellular	Cytoplasmic
P80239	ahpC	Alkyl hydroperoxide reductase subunit C (EC 1.11.1.15) (Alkyl hydroperoxide reductase protein C22) (General stress protein 22) (Peroxiredoxin) (Thioredoxin peroxidase)			Cytoplasmic	0	0			@Intracellular	Cytoplasmic
P46353	drm	Phosphopentomutase (EC 5.4.2.7) (Phosphodeoxyribomutase)			Cytoplasmic	0	0			@Intracellular	Cytoplasmic
P40778	murC	UDP-N-acetylmuramate--L-alanine ligase (EC 6.3.2.8) (UDP-N-acetylmuramoyl-L-alanine synthetase)			Cytoplasmic	0	0			@Intracellular	Cytoplasmic
P94549	fadB	Probable enoyl-CoA hydratase (EC 4.2.1.17)			Cytoplasmic	0	0			@Intracellular	Cytoplasmic
P37487	ppaC	Manganese-dependent inorganic pyrophosphatase (EC 3.6.1.1) (Pyrophosphate phospho-hydrolase) (PPase)			Cytoplasmic	0	0			@Intracellular	Cytoplasmic
P46354	punA	Purine nucleoside phosphorylase 1 (PNP 1) (EC 2.4.2.1) (Inosine phosphorylase) (Inosine-guanosine phosphorylase) (Purine nucleoside phosphorylase I) (PNP I) (PU-NPase I)			Cytoplasmic	0	0			@Intracellular	Cytoplasmic
P38424	engB	Probable GTP-binding protein EngB			Cytoplasmic	0	0			@Intracellular	Cytoplasmic
P39762	ampS	Aminopeptidase AmpS (EC 3.4.11.-)			Cytoplasmic	0	0			@Intracellular	Cytoplasmic
P39634	rocA	1-pyrroline-5-carboxylate dehydrogenase (P5C dehydrogenase) (EC 1.2.1.88) (L-glutamate gamma-semialdehyde dehydrogenase)			Cytoplasmic	0	0			@Intracellular	Cytoplasmic
O34409	yflN	Probable metallo-hydrolase YflN (EC 3.-.-.-)			Cytoplasmic	0	0			@Intracellular	Cytoplasmic
P39605	nfrA1	FMN reductase (NADPH) (EC 1.5.1.38) (NADPH-dependent FMN reductase) (NADPH-dependent nitro/flavin reductase) (NADPH-dependent nitroreductase) (NADPH-dependent oxidoreductase)			Unknown	0	0			@Intracellular	Cytoplasmic
O07609	yhfK	Uncharacterized sugar epimerase YhfK (EC 4.-.-.-)			Cytoplasmic	0	0			@Intracellular	Cytoplasmic
P05648	dnaA	Chromosomal replication initiator protein DnaA			Cytoplasmic	0	0			@Intracellular	Cytoplasmic
P39149	upp	Uracil phosphoribosyltransferase (EC 2.4.2.9) (UMP pyrophosphorylase) (UPRTase)			Cytoplasmic	0	0			@Intracellular	Cytoplasmic
P96579	ydaF	Putative ribosomal N-acetyltransferase YdaF (EC 2.3.1.-)			Cytoplasmic	0	0			@Intracellular	Cytoplasmic
O34948	ykwC	Uncharacterized oxidoreductase YkwC (EC 1.1.-.-)			Cytoplasmic	0	Y			@Intracellular	Cytoplasmic
P12013	gntZ	6-phosphogluconate dehydrogenase, NAD(+)-dependent, decarboxylating (EC 1.1.1.343)			Cytoplasmic	0	0			@Intracellular	Cytoplasmic
O34824	glmM	Phosphoglucosamine mutase (EC 5.4.2.10)			Cytoplasmic	0	0			@Intracellular	Cytoplasmic
O32214	cysJ	Sulfite reductase [NADPH] flavoprotein alpha-component (SiR-FP) (EC 1.8.1.2)		Yes	CytoplasmicMembrane	0	0			@Intracellular	Cytoplasmic
P55179	pepT	Peptidase T (EC 3.4.11.4) (Aminotripeptidase) (Tripeptidase) (Tripeptide aminopeptidase)			Cytoplasmic	0	0			@Intracellular	Cytoplasmic
P54550	namA	NADPH dehydrogenase (EC 1.6.99.1) (Xenobiotic reductase)			Cytoplasmic	0	0			@Intracellular	Cytoplasmic
P39587	ywbD	Putative ribosomal RNA large subunit methyltransferase YwbD (EC 2.1.1.-)			Cytoplasmic	0	0			@Intracellular	Cytoplasmic
O32180	yusN	Uncharacterized protein YusN	sigG		Unknown	0	0			@Intracellular	Cytoplasmic
O05251	malR	Transcriptional regulatory protein MalR (Malate response regulator)			Cytoplasmic	0	0			@Intracellular	Cytoplasmic
O32099	yueD	Benzil reductase ((S)-benzoin forming) (EC 1.1.1.320)			Cytoplasmic	0	0			@Intracellular	Cytoplasmic
P49852	hmp	Flavohemoprotein (Flavohemoglobin) (Hemoglobin-like protein) (Nitric oxide dioxygenase) (NO oxygenase) (NOD) (EC 1.14.12.17)			Cytoplasmic	0	0			@Intracellular	Cytoplasmic
O31601	yjbC	Putative acetyltransferase YjbC (EC 2.3.1.-)			Cytoplasmic	0	0			@Intracellular	Cytoplasmic
O34746	fabHA	3-oxoacyl-[acyl-carrier-protein] synthase 3 protein 1 (EC 2.3.1.180) (3-oxoacyl-[acyl-carrier-protein] synthase III protein 1) (Beta-ketoacyl-ACP synthase III 1) (KAS III 1) (bFabH1)			Cytoplasmic	0	0			@Intracellular	Cytoplasmic
P80864	tpx	Probable thiol peroxidase (EC 1.11.1.-) (Superoxide-inducible protein 8) (SOI8)			Cytoplasmic	0	0			@Intracellular	Cytoplasmic
P09339	citB	Aconitate hydratase (Aconitase) (EC 4.2.1.3) (Citrate hydro-lyase)			Cytoplasmic	0	0			@Intracellular	Cytoplasmic
P94463	fmt	Methionyl-tRNA formyltransferase (EC 2.1.2.9)			Cytoplasmic	0	0			@Intracellular	Cytoplasmic
P37528	pdxT	Glutamine amidotransferase subunit PdxT (EC 2.6.-.-) (Glutamine amidotransferase glutaminase subunit PdxT)			Cytoplasmic	0	0			@Intracellular	Cytoplasmic
P27876	tpiA	Triosephosphate isomerase (TIM) (EC 5.3.1.1) (Triose-phosphate isomerase)			Cytoplasmic	0	0			@Intracellular	Cytoplasmic
O35020	mnmA	tRNA-specific 2-thiouridylase MnmA (EC 2.8.1.-)			Cytoplasmic	0	0			@Intracellular	Cytoplasmic
P94573	ywoC	Uncharacterized isochorismatase family protein YwoC (EC 3.-.-.-)			Cytoplasmic	0	0			@Intracellular	Cytoplasmic
O34925	deoD	Purine nucleoside phosphorylase DeoD-type (PNP) (EC 2.4.2.1) (Purine nucleoside phosphorylase II) (PU-NPase II)			Cytoplasmic	0	0			@Intracellular	Cytoplasmic
O32232	est	Carboxylesterase (EC 3.1.1.1)			Cytoplasmic	0	0			@Intracellular	Cytoplasmic
P39914	ytxJ	Uncharacterized protein YtxJ (ORF2) (ORF3)			Cytoplasmic	0	0			@Intracellular	Cytoplasmic
P96575	ydaB	Putative acyl--CoA ligase YdaB (EC 6.2.1.-)			Cytoplasmic	0	0			@Intracellular	Cytoplasmic
O32028	mtnN	5'-methylthioadenosine/S-adenosylhomocysteine nucleosidase (MTA/SAH nucleosidase) (MTAN) (EC 3.2.2.9) (5'-methylthioadenosine nucleosidase) (MTA nucleosidase) (S-adenosylhomocysteine nucleosidase) (AdoHcy nucleosidase) (SAH nucleosidase) (SRH nucleosidase)			Cytoplasmic	0	0			@Intracellular	Cytoplasmic
P70998	speE	Spermidine synthase (EC 2.5.1.16) (Putrescine aminopropyltransferase) (PAPT) (SPDSY)			Unknown	0	0			@Intracellular	Cytoplasmic
P81102	yodC	Putative NAD(P)H nitroreductase YodC (EC 1.-.-.-)			Cytoplasmic	0	0			@Intracellular	Cytoplasmic
Q04797	asd	Aspartate-semialdehyde dehydrogenase (ASA dehydrogenase) (ASADH) (EC 1.2.1.11) (Aspartate-beta-semialdehyde dehydrogenase)	sigK		Cytoplasmic	0	Y			@Intracellular	Cytoplasmic
O32264	yvcT	Probable 2-ketogluconate reductase (2KR) (EC 1.1.1.215)			Cytoplasmic	0	0			@Intracellular	Cytoplasmic
P07860	sigF	RNA polymerase sigma-F factor (Sporulation sigma factor) (Stage II sporulation protein AC)	sigF|sigG		Cytoplasmic	0	0			@Intracellular	Cytoplasmic
P39760	ktrC	Ktr system potassium uptake protein C (K(+)-uptake protein KtrC) (ORF4)			Cytoplasmic	0	0			@Intracellular	Cytoplasmic
Q45499	suhB	Inositol-1-monophosphatase (I-1-Pase) (IMPase) (Inositol-1-phosphatase) (EC 3.1.3.25)			Cytoplasmic	0	0			@Intracellular	Cytoplasmic
P54524	yqiG	Probable NADH-dependent flavin oxidoreductase YqiG (EC 1.-.-.-)			Cytoplasmic	0	0			@Intracellular	Cytoplasmic
P39121	deoC	Deoxyribose-phosphate aldolase (DERA) (EC 4.1.2.4) (2-deoxy-D-ribose 5-phosphate aldolase) (Phosphodeoxyriboaldolase) (Deoxyriboaldolase)			Cytoplasmic	0	0			@Intracellular	Cytoplasmic
P17620	ribBA	Riboflavin biosynthesis protein RibBA [Includes: 3,4-dihydroxy-2-butanone 4-phosphate synthase (DHBP synthase) (EC 4.1.99.12); GTP cyclohydrolase-2 (EC 3.5.4.25) (GTP cyclohydrolase II)]			Cytoplasmic	0	0			@Intracellular	Cytoplasmic
P53560	ytbQ	Uncharacterized protein YtbQ			Cytoplasmic	0	0			@Intracellular	Cytoplasmic
P80871	ywrO	General stress protein 14 (GSP14) (EC 1.6.99.-)			Unknown	0	Y			@Intracellular	Cytoplasmic
P80880	trxB	Thioredoxin reductase (TRXR) (EC 1.8.1.9) (General stress protein 35) (GSP35)			Cytoplasmic	0	0			@Intracellular	Cytoplasmic
C0SPB1	yukJ	Uncharacterized protein YukJ			Unknown	0	0			@Intracellular	Cytoplasmic
P42242	ycbJ	Uncharacterized protein YcbJ			Cytoplasmic	0	0			@Intracellular	Cytoplasmic
Q07836	wapI	Immunity protein WapI			Unknown	0	0			@Intracellular	Cytoplasmic
P39912	aroA	Protein AroA(G) [Includes: Phospho-2-dehydro-3-deoxyheptonate aldolase (EC 2.5.1.54) (3-deoxy-D-arabino-heptulosonate 7-phosphate synthase) (DAHP synthase) (Phospho-2-keto-3-deoxyheptonate aldolase); Chorismate mutase (EC 5.4.99.5)]			Cytoplasmic	0	0			@Intracellular	Cytoplasmic
P49778	efp	Elongation factor P (EF-P)			Cytoplasmic	0	0			@Intracellular	Cytoplasmic
P54377	gcvPB	Probable glycine dehydrogenase (decarboxylating) subunit 2 (EC 1.4.4.2) (Glycine cleavage system P-protein subunit 2) (Glycine decarboxylase subunit 2) (Glycine dehydrogenase (aminomethyl-transferring) subunit 2)			Cytoplasmic	0	0			@Intracellular	Cytoplasmic
P08877	ptsH	Phosphocarrier protein HPr (EC 2.7.11.-) (Histidine-containing protein)			Cytoplasmic	0	0			@Intracellular	Cytoplasmic
P35159	rluB	Ribosomal large subunit pseudouridine synthase B (EC 5.4.99.22) (23S rRNA pseudouridine(2605) synthase) (rRNA pseudouridylate synthase B) (rRNA-uridine isomerase B)			Cytoplasmic	0	0			@Intracellular	Cytoplasmic
O32223	yvaA	Uncharacterized oxidoreductase YvaA (EC 1.-.-.-)			Cytoplasmic	0	0			@Intracellular	Cytoplasmic
O34443	apt	Adenine phosphoribosyltransferase (APRT) (EC 2.4.2.7)			Cytoplasmic	0	0			@Intracellular	Cytoplasmic
O34569	yoaA	Uncharacterized N-acetyltransferase YoaA (EC 2.3.1.-)			Cytoplasmic	0	0			@Intracellular	Cytoplasmic
P52996	panB	3-methyl-2-oxobutanoate hydroxymethyltransferase (EC 2.1.2.11) (Ketopantoate hydroxymethyltransferase) (KPHMT)			Cytoplasmic	0	0			@Intracellular	Cytoplasmic
O34450	nagA	N-acetylglucosamine-6-phosphate deacetylase (EC 3.5.1.25) (GlcNAc 6-P deacetylase)			Cytoplasmic	0	0			@Intracellular	Cytoplasmic
P46905	yccK	Uncharacterized oxidoreductase YccK (EC 1.-.-.-)			Cytoplasmic	0	0			@Intracellular	Cytoplasmic
P96613	murF	UDP-N-acetylmuramoyl-tripeptide--D-alanyl-D-alanine ligase (EC 6.3.2.10) (D-alanyl-D-alanine-adding enzyme) (UDP-MurNAc-pentapeptide synthetase)			Cytoplasmic	0	0			@Intracellular	Cytoplasmic
P52998	panC	Pantothenate synthetase (PS) (EC 6.3.2.1) (Pantoate--beta-alanine ligase) (Pantoate-activating enzyme)			Cytoplasmic	0	0			@Intracellular	Cytoplasmic
O32210	yvgN	Glyoxal reductase (GR) (EC 1.1.1.-) (Methylglyoxal reductase) (EC 1.1.1.283)			Cytoplasmic	0	0			@Intracellular	Cytoplasmic
P54518	yqhT	Uncharacterized peptidase YqhT (EC 3.4.-.-)			Cytoplasmic	0	0			@Intracellular	Cytoplasmic
P94544	polX	DNA polymerase/3'-5' exonuclease PolX [Includes: DNA polymerase type-X (EC 2.7.7.7); 3'-5' exodeoxyribonuclease (3'-5' exonuclease) (EC 3.1.11.-)]			Cytoplasmic	0	0			@Intracellular	Cytoplasmic
O06476	yfmR	Uncharacterized ABC transporter ATP-binding protein YfmR (EC 3.6.3.-)			Cytoplasmic	0	0			@Intracellular	Cytoplasmic
P39815	trmFO	Methylenetetrahydrofolate--tRNA-(uracil-5-)-methyltransferase TrmFO (EC 2.1.1.74) (Folate-dependent tRNA (uracil-5-)-methyltransferase) (Folate-dependent tRNA(M-5-U54)-methyltransferase)			Cytoplasmic	0	0			@Intracellular	Cytoplasmic
P50843	kduI	4-deoxy-L-threo-5-hexosulose-uronate ketol-isomerase (EC 5.3.1.17) (5-keto-4-deoxyuronate isomerase) (DKI isomerase)			Unknown	0	0			@Intracellular	Cytoplasmic
O34445	ylbN	Uncharacterized protein YlbN			Cytoplasmic	0	0			@Intracellular	Cytoplasmic
O06747	yitL	Uncharacterized protein YitL		Yes	CytoplasmicMembrane	0	0			@Intracellular	Cytoplasmic
P37967	pnbA	Para-nitrobenzyl esterase (EC 3.1.1.-) (Intracellular esterase B) (PNB carboxy-esterase) (PNBCE)			Cytoplasmic	0	0			@Intracellular	Cytoplasmic
Q06795	nusG	Transcription termination/antitermination protein NusG			Cytoplasmic	0	0			@Intracellular	Cytoplasmic
P14949	trxA	Thioredoxin (Trx)			Cytoplasmic	0	0			@Intracellular	Cytoplasmic
P51831	fabG	3-oxoacyl-[acyl-carrier-protein] reductase FabG (EC 1.1.1.100) (3-ketoacyl-acyl carrier protein reductase) (Beta-Ketoacyl-acyl carrier protein reductase) (Beta-ketoacyl-ACP reductase)			Cytoplasmic	0	0			@Intracellular	Cytoplasmic
O31740	rimM	Ribosome maturation factor RimM			Cytoplasmic	0	0			@Intracellular	Cytoplasmic
P54378	gcvT	Aminomethyltransferase (EC 2.1.2.10) (Glycine cleavage system T protein)			Cytoplasmic	0	0			@Intracellular	Cytoplasmic
O34471	ytlQ	Uncharacterized protein YtlQ		Yes	CytoplasmicMembrane	0	0			@Intracellular	Cytoplasmic
O32253	cggR	Central glycolytic genes regulator			Cytoplasmic	0	0			@Intracellular	Cytoplasmic
P39071	dhbA	2,3-dihydro-2,3-dihydroxybenzoate dehydrogenase (EC 1.3.1.28) (Cold shock protein CSI14)			Cytoplasmic	0	0			@Intracellular	Cytoplasmic
P94512	ysaA	Putative uncharacterized hydrolase YsaA (EC 3.-.-.-)			Unknown	0	0			@Intracellular	Cytoplasmic
O32166	yurZ	Uncharacterized protein YurZ			Unknown	0	0			@Intracellular	Cytoplasmic
O34355	ytcJ	Putative amidohydrolase YtcJ (EC 3.5.-.-)			Cytoplasmic	0	0			@Intracellular	Cytoplasmic
P54569	yqkF	Uncharacterized oxidoreductase YqkF (EC 1.-.-.-)			Cytoplasmic	0	0			@Intracellular	Cytoplasmic
P80698	tig	Trigger factor (TF) (EC 5.2.1.8) (PPIase) (Vegetative protein 2) (VEG2)			Cytoplasmic	0	0			@Intracellular	Cytoplasmic
O31875	nrdEB	Ribonucleoside-diphosphate reductase NrdEB subunit alpha (EC 1.17.4.1) (Ribonucleotide reductase large subunit) [Cleaved into: Bsu nrdEB intein]		Yes	Unknown	0	0	1		@Intracellular	Cytoplasmic
O34912	hisI	Histidine biosynthesis bifunctional protein HisIE [Includes: Phosphoribosyl-AMP cyclohydrolase (PRA-CH) (EC 3.5.4.19); Phosphoribosyl-ATP pyrophosphatase (PRA-PH) (EC 3.6.1.31)]			Cytoplasmic	0	0			@Intracellular	Cytoplasmic
P28599	groS	10 kDa chaperonin (GroES protein) (Protein Cpn10)			Cytoplasmic	0	0			@Secreted via minor pathways (bacteriocin) (no CS)	Extracellular
P54154	msrA	Peptide methionine sulfoxide reductase MsrA (Protein-methionine-S-oxide reductase) (EC 1.8.4.11) (Peptide-methionine (S)-S-oxide reductase) (Peptide Met(O) reductase)			Cytoplasmic	0	0			@Intracellular	Cytoplasmic
O34499	pgl	6-phosphogluconolactonase (EC 3.1.1.31)			Unknown	0	0			@Intracellular	Cytoplasmic
O35000	nagB	Glucosamine-6-phosphate deaminase 1 (EC 3.5.99.6) (GlcN6P deaminase 1) (GNPDA 1) (Glucosamine-6-phosphate isomerase 1)			Cytoplasmic	0	0			@Intracellular	Cytoplasmic
P54169	ypgR	Uncharacterized protein YpgR			Cytoplasmic	0	0			@Intracellular	Cytoplasmic
P94428	gabD	Succinate-semialdehyde dehydrogenase [NADP(+)] (SSDH) (EC 1.2.1.79)			Cytoplasmic	0	0			@Intracellular	Cytoplasmic
P08065	sdhA	Succinate dehydrogenase flavoprotein subunit (EC 1.3.99.1)		Yes	Cytoplasmic	0	Y			@N-terminally anchored (with CS)	Membrane
O34944	ytjP	Putative dipeptidase YtjP (EC 3.4.13.-)			Cytoplasmic	0	0			@Intracellular	Cytoplasmic
O34522	trmB	tRNA (guanine-N(7)-)-methyltransferase (EC 2.1.1.33) (BsTrmB) (tRNA (guanine(46)-N(7))-methyltransferase) (tRNA(m7G46)-methyltransferase)			Cytoplasmic	0	0			@Intracellular	Cytoplasmic
P52035	bsaA	Glutathione peroxidase homolog BsaA (EC 1.-.-.-)			Cytoplasmic	0	0			@Intracellular	Cytoplasmic
P54574	fur	Ferric uptake regulation protein (Ferric uptake regulator)			Cytoplasmic	0	0			@Intracellular	Cytoplasmic
Q45593	yydI	Probable peptide export ATP-binding protein YydI		Yes	CytoplasmicMembrane	0	0			@Intracellular	Cytoplasmic
O34570	ytlP	UPF0097 protein YtlP			Cytoplasmic	0	0			@Intracellular	Cytoplasmic
Q45585	sigW	ECF RNA polymerase sigma factor SigW (ECF sigma factor SigW) (Alternative RNA polymerase sigma factor SigW) (RNA polymerase sigma-W factor) (Sigma-W factor)			Cytoplasmic	0	0			@Intracellular	Cytoplasmic
O35006	hisA	1-(5-phosphoribosyl)-5-[(5-phosphoribosylamino)methylideneamino] imidazole-4-carboxamide isomerase (EC 5.3.1.16) (Phosphoribosylformimino-5-aminoimidazole carboxamide ribotide isomerase)			Cytoplasmic	0	0			@Intracellular	Cytoplasmic
P80875	yceD	General stress protein 16U (GSP16U)			Cytoplasmic	0	0			@Intracellular	Cytoplasmic
O34812	yfmJ	Putative NADP-dependent oxidoreductase YfmJ (EC 1.-.-.-)		Yes	CytoplasmicMembrane	0	0			@Intracellular	Cytoplasmic
Q03522	murD	UDP-N-acetylmuramoylalanine--D-glutamate ligase (EC 6.3.2.9) (D-glutamic acid-adding enzyme) (UDP-N-acetylmuramoyl-L-alanyl-D-glutamate synthetase)			Cytoplasmic	0	0			@Intracellular	Cytoplasmic
O34743	ylbA	Uncharacterized protein YlbA			Cytoplasmic	0	0			@Intracellular	Cytoplasmic
P37522	soj	Sporulation initiation inhibitor protein Soj (EC 3.6.-.-)		Yes	CytoplasmicMembrane	0	0			@Intracellular	Cytoplasmic
P70948	yitV	Putative esterase YitV (EC 3.1.-.-)			Cytoplasmic	0	0			@Intracellular	Cytoplasmic
P37478	yycF	Transcriptional regulatory protein YycF			Cytoplasmic	0	0			@Intracellular	Cytoplasmic
O32037	tcdA	tRNA threonylcarbamoyladenosine dehydratase (EC 6.1.-.-) (t(6)A37 dehydratase)		Yes	Cytoplasmic	1	0			@N-terminally anchored (No CS)	Membrane
P17631	dnaJ	Chaperone protein DnaJ			Cytoplasmic	0	0			@Intracellular	Cytoplasmic
P42982	ypjH	Uncharacterized glycosyltransferase YpjH (EC 2.4.-.-)			Cytoplasmic	0	0			@Intracellular	Cytoplasmic
O05519	ydiF	Uncharacterized ABC transporter ATP-binding protein YdiF			Cytoplasmic	0	0			@Intracellular	Cytoplasmic
O31857	yojG	Uncharacterized deacetylase YojG (EC 3.-.-.-)			Cytoplasmic	0	0			@Intracellular	Cytoplasmic
P45872	prfA	Peptide chain release factor 1 (RF-1)			Cytoplasmic	0	0			@Intracellular	Cytoplasmic
P53555	bioK	L-Lysine-8-amino-7-oxononanoate aminotransferase (EC 2.6.1.-) (7,8-diamino-pelargonic acid aminotransferase) (DAPA AT) (DAPA aminotransferase) (7,8-diaminononanoate synthase) (DANS) (Diaminopelargonic acid synthase)			Cytoplasmic	0	0			@Intracellular	Cytoplasmic
P54534	yqiW	UPF0403 protein YqiW			Cytoplasmic	0	0			@Intracellular	Cytoplasmic
O34394	yjjA	Uncharacterized protein YjjA			Cytoplasmic	0	0			@Intracellular	Cytoplasmic
P54167	metA	Homoserine O-succinyltransferase (EC 2.3.1.46) (Homoserine O-transsuccinylase) (HTS)			Cytoplasmic	0	0			@Intracellular	Cytoplasmic
O31642	yjdA	Uncharacterized oxidoreductase YjdA (EC 1.-.-.-)			Cytoplasmic	0	0			@Intracellular	Cytoplasmic
O07531	yhdC	Uncharacterized protein YhdC		Yes	Unknown	0	Y			@N-terminally anchored (No CS)	Membrane
P26901	katA	Vegetative catalase (EC 1.11.1.6)			Cytoplasmic	0	0			@Intracellular	Cytoplasmic
P32726	rimP	Ribosome maturation factor RimP (P15A)			Cytoplasmic	0	0			@Intracellular	Cytoplasmic
P80865	sucD	Succinyl-CoA ligase [ADP-forming] subunit alpha (EC 6.2.1.5) (Succinyl-CoA synthetase subunit alpha) (SCS-alpha) (Vegetative protein 239) (VEG239)			Cytoplasmic	0	0			@Intracellular	Cytoplasmic
O34689	mhqA	Putative ring-cleaving dioxygenase MhqA (EC 1.13.11.-)			Cytoplasmic	0	0			@Intracellular	Cytoplasmic
Q05865	folC	Folylpolyglutamate synthase (EC 6.3.2.17) (Folylpoly-gamma-glutamate synthetase) (FPGS) (Tetrahydrofolate synthase) (Tetrahydrofolylpolyglutamate synthase)			Cytoplasmic	0	0			@Intracellular	Cytoplasmic
P32396	hemH	Ferrochelatase (EC 4.99.1.1) (Heme synthase) (Protoheme ferro-lyase)			Cytoplasmic	0	0			@Intracellular	Cytoplasmic
P51785	ilvD	Dihydroxy-acid dehydratase (DAD) (EC 4.2.1.9) (Vegetative protein 110) (VEG110)			Cytoplasmic	0	0			@Intracellular	Cytoplasmic
O34979	yvrO	Uncharacterized ABC transporter ATP-binding protein YvrO (EC 3.6.3.-)		Yes	CytoplasmicMembrane	0	0			@Intracellular	Cytoplasmic
P38423	yqxK	Uncharacterized protein YqxK (ORF2)			Cytoplasmic	0	0			@Intracellular	Cytoplasmic
P96741	ywtE	Putative phosphatase YwtE (EC 3.1.3.-)			Cytoplasmic	0	0			@Intracellular	Cytoplasmic
P40740	bglH	Aryl-phospho-beta-D-glucosidase BglH (EC 3.2.1.86) (6-phospho-beta-glucosidase)			Cytoplasmic	0	0			@Intracellular	Cytoplasmic
P94559	ysnB	Putative metallophosphoesterase YsnB (EC 3.1.4.-)			Cytoplasmic	0	0			@Intracellular	Cytoplasmic
O34308	ytkK	Putative oxidoreductase YtkK (EC 1.-.-.-)			Cytoplasmic	0	0			@Intracellular	Cytoplasmic
O34402	yrrD	Uncharacterized protein YrrD	sigG		Cytoplasmic	0	0			@Intracellular	Cytoplasmic
Q45480	ylyB	Uncharacterized RNA pseudouridine synthase YlyB (EC 5.4.99.-) (RNA pseudouridylate synthase) (RNA-uridine isomerase)			Cytoplasmic	0	0			@Intracellular	Cytoplasmic
O06993	mdxK	Maltose phosphorylase (EC 2.4.1.8)			Cytoplasmic	0	0			@Intracellular	Cytoplasmic
P71017	gbsB	Alcohol dehydrogenase (EC 1.1.1.1)			Cytoplasmic	0	0			@Intracellular	Cytoplasmic
O07530	yhdB	Uncharacterized protein YhdB			Unknown	0	0			@Intracellular	Cytoplasmic
P42980	mgsA	Methylglyoxal synthase (MGS) (EC 4.2.3.3)			Cytoplasmic	0	0			@Intracellular	Cytoplasmic
P70945	yitS	DegV domain-containing protein YitS			Cytoplasmic	0	0			@Intracellular	Cytoplasmic
O34885	ydiS	Type-2 restriction enzyme BsuMI component YdiS (R.BsuM) (R.BsuMI) (EC 3.1.21.4) (Endonuclease BsuMI component YdiS) (Type II restriction enzyme BsuMI component YdiS)			Unknown	0	0			@Intracellular	Cytoplasmic
P94389	ycgL	Uncharacterized protein YcgL			Cytoplasmic	0	0			@Intracellular	Cytoplasmic
P21476	rpsS	30S ribosomal protein S19 (BS19)			Cytoplasmic	0	0			@Intracellular	Cytoplasmic
O34530	rsgA	Putative ribosome biogenesis GTPase RsgA (EC 3.6.1.-)			Cytoplasmic	0	0			@Intracellular	Cytoplasmic
P94541	rnhC	Ribonuclease HIII (RNase HIII) (EC 3.1.26.4)			Unknown	0	0			@Intracellular	Cytoplasmic
Q45494	ykrA	Putative phosphatase YkrA (EC 3.1.3.-)			Cytoplasmic	0	0			@Intracellular	Cytoplasmic
P13792	phoP	Alkaline phosphatase synthesis transcriptional regulatory protein PhoP	sigE		Cytoplasmic	0	0			@Intracellular	Cytoplasmic
P28367	prfB	Peptide chain release factor 2 (RF-2)			Cytoplasmic	0	0			@Intracellular	Cytoplasmic
P42236	ycbD	Probable aldehyde dehydrogenase YcbD (EC 1.2.1.3)			Cytoplasmic	0	0			@Intracellular	Cytoplasmic
P42976	dapB	4-hydroxy-tetrahydrodipicolinate reductase (HTPA reductase) (EC 1.17.1.8)			Cytoplasmic	0	0			@Intracellular	Cytoplasmic
O35010	ykfC	Gamma-D-glutamyl-L-lysine endopeptidase (EC 3.4.-.-) (Cell wall endopeptidase YkfC)			Extracellular	0	0			@Intracellular	Cytoplasmic
P42403	bglC	Aryl-phospho-beta-D-glucosidase BglC (EC 3.2.1.86) (6-phospho-beta-glucosidase)		Yes	Cytoplasmic	0	0	1		@Intracellular	Cytoplasmic
O07513	hit	Protein hit			Cytoplasmic	0	0			@Intracellular	Cytoplasmic
O06746	yitK	UPF0234 protein yitk			Cytoplasmic	0	0			@Intracellular	Cytoplasmic
P46336	iolS	Protein IolS (EC 1.1.1.-) (AKR11A) (Vegetative protein 147) (VEG147)			Cytoplasmic	0	0			@Intracellular	Cytoplasmic
O31418	mrnC	Mini-ribonuclease 3 (Mini-3) (Mini-RNase 3) (EC 3.1.26.-) (Mini-RNase III) (Mini-III)			Unknown	0	0			@Intracellular	Cytoplasmic
O31427	skfE	SkfA peptide export ATP-binding protein SkfE (EC 3.6.3.25)		Yes	CytoplasmicMembrane	0	0			@Intracellular	Cytoplasmic
O32158	yurQ	Uncharacterized protein YurQ			Cytoplasmic	0	0			@Intracellular	Cytoplasmic
O34484	mapB	Methionine aminopeptidase 2 (MAP 2) (MetAP 2) (EC 3.4.11.18)			Cytoplasmic	0	0			@Intracellular	Cytoplasmic
O34588	ykuJ	Uncharacterized protein YkuJ			Unknown	0	0			@Intracellular	Cytoplasmic
P21468	rpsF	30S ribosomal protein S6 (BS9)			Cytoplasmic	0	0			@Intracellular	Cytoplasmic
P32732	truB	tRNA pseudouridine synthase B (EC 5.4.99.25) (tRNA pseudouridine(55) synthase) (Psi55 synthase) (tRNA pseudouridylate synthase) (tRNA-uridine isomerase)			Cytoplasmic	0	0			@Intracellular	Cytoplasmic
P42414	iolC	5-dehydro-2-deoxygluconokinase (EC 2.7.1.92) (2-deoxy-5-keto-D-gluconate kinase) (DKG kinase)			Cytoplasmic	0	0			@Intracellular	Cytoplasmic
O34932	coaE	Dephospho-CoA kinase (EC 2.7.1.24) (Dephosphocoenzyme A kinase)		Yes	CytoplasmicMembrane	0	0			@Intracellular	Cytoplasmic
P37470	spoVC	Peptidyl-tRNA hydrolase (PTH) (EC 3.1.1.29) (Stage V sporulation protein C)			Cytoplasmic	0	0			@Intracellular	Cytoplasmic
P54455	nadD	Nicotinate-nucleotide adenylyltransferase (EC 2.7.7.18) (Deamido-NAD(+) diphosphorylase) (Deamido-NAD(+) pyrophosphorylase) (Nicotinate mononucleotide adenylyltransferase) (NaMN adenylyltransferase)			Cytoplasmic	0	0			@Intracellular	Cytoplasmic
O31635	yjcM	Uncharacterized protein YjcM			Unknown	0	Y			@Secretory(released) (with CS)	Extracellular
P38049	hmoB	Heme-degrading monooxygenase HmoB (EC 1.14.99.3) (Heme oxygenase)			Unknown	0	0			@Intracellular	Cytoplasmic
O07617	phoE	Uncharacterized phosphatase PhoE (EC 3.1.3.-)			Cytoplasmic	0	0			@Intracellular	Cytoplasmic
O32053	tgt	Queuine tRNA-ribosyltransferase (EC 2.4.2.29) (Guanine insertion enzyme) (tRNA-guanine transglycosylase)			Cytoplasmic	0	0			@Intracellular	Cytoplasmic
P19946	rplO	50S ribosomal protein L15			Unknown	0	0			@Intracellular	Cytoplasmic
P19947	rpmD	50S ribosomal protein L30 (BL27)			Cytoplasmic	0	0			@Intracellular	Cytoplasmic
P94424	nfrA2	FMN reductase [NAD(P)H] (EC 1.5.1.39) (NAD(P)H-dependent FMN reductase) (NAD(P)H-dependent nitro/flavin reductase) (NAD(P)H-dependent nitroreductase) (NAD(P)H-dependent oxidoreductase)			Cytoplasmic	0	0			@Intracellular	Cytoplasmic
Q796Y8	ygaF	Putative peroxiredoxin YgaF (EC 1.11.1.15) (Bacterioferritin comigratory protein) (Thioredoxin reductase)			Cytoplasmic	0	0			@Intracellular	Cytoplasmic
O06734	yisY	AB hydrolase superfamily protein YisY (EC 3.-.-.-)	sigG		Cytoplasmic	0	0			@Intracellular	Cytoplasmic
O31714	fruK	1-phosphofructokinase (EC 2.7.1.56) (Fructose 1-phosphate kinase)			Unknown	0	0			@Intracellular	Cytoplasmic
Q45495	defB	Peptide deformylase 2 (PDF 2) (EC 3.5.1.88) (Polypeptide deformylase 2)			Cytoplasmic	0	0			@Intracellular	Cytoplasmic
O32114	dapF	Diaminopimelate epimerase (DAP epimerase) (EC 5.1.1.7)			Cytoplasmic	0	0			@Intracellular	Cytoplasmic
P54304	hemN	Oxygen-independent coproporphyrinogen-III oxidase 1 (Coprogen oxidase) (Coproporphyrinogenase) (EC 1.3.99.22)			Cytoplasmic	0	0			@Intracellular	Cytoplasmic
P71019	fabD	Malonyl CoA-acyl carrier protein transacylase (MCT) (EC 2.3.1.39)			Cytoplasmic	0	0			@Intracellular	Cytoplasmic
P80861	yjlD	NADH dehydrogenase-like protein YjlD (EC 1.6.99.-) (Glucose starvation-inducible protein 5) (GSI5)		Yes	CytoplasmicMembrane	0	Y			@Intracellular	Cytoplasmic
P80872	yocK	General stress protein 16O (GSP16O)			Cytoplasmic	0	0			@Intracellular	Cytoplasmic
P94569	ysoA	TPR repeat-containing protein YsoA			Cytoplasmic	0	0			@Intracellular	Cytoplasmic
O06976	crh	HPr-like protein Crh (Catabolite repression HPr)			Cytoplasmic	0	0			@Intracellular	Cytoplasmic
O07587	yhdR	Putative aspartate aminotransferase YhdR (AspAT) (EC 2.6.1.1) (Transaminase A)			Cytoplasmic	0	0			@Intracellular	Cytoplasmic
P37529	dck	Deoxyadenosine/deoxycytidine kinase (dAK/dCK) (EC 2.7.1.74) (EC 2.7.1.76)			Cytoplasmic	0	0			@Intracellular	Cytoplasmic
P40870	spoVAEA	Stage V sporulation protein AE			Cytoplasmic	0	0			@Intracellular	Cytoplasmic
P42977	cca	CCA-adding enzyme (EC 2.7.7.72) (CCA tRNA nucleotidyltransferase) (tRNA CCA-pyrophosphorylase) (tRNA adenylyl-/cytidylyl- transferase) (tRNA nucleotidyltransferase) (tRNA-NT)			Cytoplasmic	0	0			@Intracellular	Cytoplasmic
O05265	yulF	Uncharacterized oxidoreductase YulF (EC 1.-.-.-)			Cytoplasmic	0	0			@Intracellular	Cytoplasmic
O31529	yesZ	Beta-galactosidase YesZ (Beta-gal) (EC 3.2.1.23) (Probable rhamnogalacturonan beta-galactosidase)			Cytoplasmic	0	0			@Intracellular	Cytoplasmic
O34842	mhqD	Putative hydrolase MhqD (EC 3.1.-.-)			Cytoplasmic	0	0			@Intracellular	Cytoplasmic
P31105	cheR	Chemotaxis protein methyltransferase (EC 2.1.1.80)			Cytoplasmic	0	0			@Intracellular	Cytoplasmic
P54476	nfo	Probable endonuclease 4 (EC 3.1.21.2) (Endodeoxyribonuclease IV) (Endonuclease IV)	sigG		Cytoplasmic	0	0			@Intracellular	Cytoplasmic
P94592	ywpJ	Putative phosphatase YwpJ (EC 3.1.3.-)			Cytoplasmic	0	0			@Intracellular	Cytoplasmic
P46328	yxbD	Uncharacterized protein YxbD			Unknown	0	0			@Intracellular	Cytoplasmic
O06977	yvcN	Uncharacterized acetyltransferase YvcN (EC 2.3.1.-)			Cytoplasmic	0	0			@Intracellular	Cytoplasmic
O31633	yjcK	Putative ribosomal-protein-alanine acetyltransferase (EC 2.3.1.128)			Cytoplasmic	0	0			@Intracellular	Cytoplasmic
P39576	ilvK	Branched-chain-amino-acid aminotransferase 2 (BCAT 2) (EC 2.6.1.42) (Vegetative protein 85) (VEG85)			Cytoplasmic	0	0			@Intracellular	Cytoplasmic

## Sheet: Table S4
Table S4: Bacillus subtilis vegetative cell membrane fraction proteins identified in at least two replicates
				PSORTb	Phobius		BOMP	PRED-LIPO	LocateP		InterPro
UniprotKB	Gene name	UniprotKB description	Predicted as membrane protein?		TM	SP	Category	Lipoprotein?	LocateP Subcellular Localization Prediction	LocateP Prediction by SwissProt Classification
Q04747	srfAB	Surfactin synthase subunit 2		Cytoplasmic	0	0			@Intracellular	Cytoplasmic
P27206	srfAA	Surfactin synthase subunit 1	Yes	Unknown	2	0			@Intracellular	Cytoplasmic
P33166	tuf	Elongation factor Tu (EF-Tu) (P-40)		Cytoplasmic	0	0			@Intracellular	Cytoplasmic
P02968	hag	Flagellin		Cytoplasmic	0	0			@Intracellular	Cytoplasmic
P54466	yqfA	UPF0365 protein YqfA	Yes	Cytoplasmic	2	0			@Multi-transmembrane	Membrane
P94356	yxkC	Uncharacterized protein YxkC	Yes	Unknown	0	Y			@N-terminally anchored (No CS)	Membrane
P20166	ptsG	PTS system glucose-specific EIICBA component (EII-Glc/EIII-Glc) (EIICBA-Glc) [Includes: Glucose permease IIC component (PTS system glucose-specific EIIC component); Glucose-specific phosphotransferase enzyme IIB component (EC 2.7.1.69) (PTS system glucose-specific EIIB component); Glucose-specific phosphotransferase enzyme IIA component (EC 2.7.1.-) (PTS system glucose-specific EIIA component)]	Yes	CytoplasmicMembrane	11	0			@Multi-transmembrane	Membrane	GO:0016021|GO:0016020|IPR011299|IPR003352|IPR004719|TIGR02002|PF02378|TIGR00852
P24327	prsA	Foldase protein PrsA (EC 5.2.1.8)	Yes	CytoplasmicMembrane	0	Y		Yes	@Lipid anchored	Extracellular	PS51257
O32167	metQ	Methionine-binding lipoprotein MetQ	Yes	CytoplasmicMembrane	0	Y		Yes	@Lipid anchored	Extracellular	IPR004872|PF03180|PIRSF002854|PS51257|PTHR30429:SF0
P39812	gltA	Glutamate synthase [NADPH] large chain (EC 1.4.1.13) (NADPH-GOGAT)	Yes	CytoplasmicMembrane	0	0			@Intracellular	Cytoplasmic
P54535	artP	Arginine-binding extracellular protein ArtP	Yes	Unknown	0	Y		Yes	@Lipid anchored	Extracellular	GO:0016020|IPR001320|SM00079|PS51257
P37476	ftsH	ATP-dependent zinc metalloprotease FtsH (EC 3.4.24.-) (Cell division protease FtsH)	Yes	CytoplasmicMembrane	2	0			@Multi-transmembrane	Membrane	GO:0016020|GO:0016021|IPR005936|IPR011546|MF_01458|PF06480|TIGR01241
P08065	sdhA	Succinate dehydrogenase flavoprotein subunit (EC 1.3.99.1)	Yes	Cytoplasmic	0	Y			@N-terminally anchored (with CS)	Membrane
P54576	mcpC	Methyl-accepting chemotaxis protein McpC	Yes	CytoplasmicMembrane	2	0			@Multi-transmembrane	Membrane	GO:0016021|GO:0016020|IPR003660|IPR004089|PS50885|PF00015|PS50111|SM00304|PF00672|SM00283
P21883	pdhC	Dihydrolipoyllysine-residue acetyltransferase component of pyruvate dehydrogenase complex (EC 2.3.1.12) (Dihydrolipoamide acetyltransferase component of pyruvate dehydrogenase complex) (E2) (S complex, 48 kDa subunit)		Cytoplasmic	0	0			@Intracellular	Cytoplasmic
O05252	yufN	Uncharacterized lipoprotein YufN	Yes	Unknown	0	Y		Yes	@Lipid anchored	Extracellular	GO:0005886|IPR003760|PS51257|PF02608
P80868	fusA	Elongation factor G (EF-G) (Vegetative protein 19) (VEG19)		Cytoplasmic	0	0			@Intracellular	Cytoplasmic
O31567	yfiY	Probable siderophore-binding lipoprotein YfiY	Yes	CytoplasmicMembrane	0	Y		Yes	@Lipid anchored	Extracellular	PS51257
P94565	leuA	2-isopropylmalate synthase (EC 2.3.3.13) (Alpha-IPM synthase) (Alpha-isopropylmalate synthase)		Cytoplasmic	0	0			@Intracellular	Cytoplasmic
P37253	ilvC	Ketol-acid reductoisomerase (EC 1.1.1.86) (Acetohydroxy-acid isomeroreductase) (Alpha-keto-beta-hydroxylacyl reductoisomerase)		Cytoplasmic	0	0			@Intracellular	Cytoplasmic
O07605	gltT	Proton/sodium-glutamate symport protein (Glutamate-aspartate carrier protein)	Yes	CytoplasmicMembrane	10	0			@Multi-transmembrane	Membrane	GO:0016020|IPR001991|PTHR11958|SSF118215|PF00375|G3DSA:1.10.3860.10|PR00173
P21880	pdhD	Dihydrolipoyl dehydrogenase (EC 1.8.1.4) (Dihydrolipoamide dehydrogenase) (E3 component of pyruvate complex) (S complex, 50 kDa subunit)		Cytoplasmic	0	0			@Intracellular	Cytoplasmic
O31662	mtnA	Methylthioribose-1-phosphate isomerase (M1Pi) (MTR-1-P isomerase) (EC 5.3.1.23) (S-methyl-5-thioribose-1-phosphate isomerase)		Cytoplasmic	0	0			@Intracellular	Cytoplasmic
P35136	serA	D-3-phosphoglycerate dehydrogenase (PGDH) (EC 1.1.1.95)		Cytoplasmic	0	0			@Intracellular	Cytoplasmic
P24141	oppA	Oligopeptide-binding protein OppA (Stage 0 sporulation protein KA)	Yes	Cellwall	0	Y	1	Yes	@Lipid anchored	Extracellular	PS51257
O32047	secDF	Protein translocase subunit SecDF	Yes	CytoplasmicMembrane	11	Y			@Multi-transmembrane	Membrane	IPR005791|IPR022646|IPR005665|IPR022813|IPR022645|TIGR01129|PF07549|TIGR00966|PF02355|PR01755|MF_01464_B|TIGR00916
P94421	yclQ	Uncharacterized ABC transporter solute-binding protein YclQ	Yes	CytoplasmicMembrane	0	Y		Yes	@Lipid anchored	Extracellular	PS51257
P42919	rplB	50S ribosomal protein L2 (BL2)		Unknown	0	0			@Intracellular	Cytoplasmic
P39126	icd	Isocitrate dehydrogenase [NADP] (IDH) (EC 1.1.1.42) (IDP) (NADP(+)-specific ICDH) (Oxalosuccinate decarboxylase)		Cytoplasmic	0	0			@Intracellular	Cytoplasmic
P08750	dacA	D-alanyl-D-alanine carboxypeptidase DacA (CPase) (DD-carboxypeptidase) (DD-peptidase) (EC 3.4.16.4) (Penicillin-binding protein 5) (PBP-5)	Yes	CytoplasmicMembrane	0	Y			@N-terminally anchored (with CS)	Membrane
P39215	mcpB	Methyl-accepting chemotaxis protein McpB (H3)	Yes	CytoplasmicMembrane	1	Y			@Multi-transmembrane	Membrane	GO:0016020|GO:0016021|IPR003122|IPR003660|IPR004089|PF02203|PF00672|SM00283|PS50111|PF00015|PS50885|SM00304|SM00319
O31663	mtnK	Methylthioribose kinase (MTR kinase) (EC 2.7.1.100)		Cytoplasmic	0	0			@Intracellular	Cytoplasmic
P08066	sdhB	Succinate dehydrogenase iron-sulfur subunit (EC 1.3.99.1)	Yes	CytoplasmicMembrane	0	0			@Intracellular	Cytoplasmic
P50849	pnp	Polyribonucleotide nucleotidyltransferase (EC 2.7.7.8) (Polynucleotide phosphorylase) (PNPase) (Vegetative protein 15) (VEG15)		Cytoplasmic	0	0			@Intracellular	Cytoplasmic
P04969	rpsK	30S ribosomal protein S11 (BS11)		Cytoplasmic	0	0			@Intracellular	Cytoplasmic
O31501	swrC	Swarming motility protein SwrC	Yes	CytoplasmicMembrane	12	0			@Multi-transmembrane	Membrane	GO:0016020|IPR001036|PR00702|PF00873
O34992	opuCA	Glycine betaine/carnitine/choline transport ATP-binding protein OpuCA	Yes	CytoplasmicMembrane	0	0			@Intracellular	Cytoplasmic	GO:0016020|IPR005892|TIGR01186
P80861	yjlD	NADH dehydrogenase-like protein YjlD (EC 1.6.99.-) (Glucose starvation-inducible protein 5) (GSI5)	Yes	CytoplasmicMembrane	0	Y			@Intracellular	Cytoplasmic
P21467	rpsE	30S ribosomal protein S5 (BS5)		Cytoplasmic	0	0			@Intracellular	Cytoplasmic
P34956	qoxB	Quinol oxidase subunit 1 (EC 1.10.3.-) (Oxidase aa(3)-600 subunit 1) (Quinol oxidase aa3-600, subunit QoxB) (Quinol oxidase polypeptide I)	Yes	CytoplasmicMembrane	15	0			@Multi-transmembrane	Membrane	GO:0016021|IPR000883|IPR014233|PTHR10422|PR01165|TIGR02882|PF00115
P39214	mcpA	Methyl-accepting chemotaxis protein McpA (H1)	Yes	CytoplasmicMembrane	2	0			@Multi-transmembrane	Membrane	GO:0016020|GO:0016021|IPR004089|IPR003660|IPR003122|PF00015|SM00304|SM00283|PS50111|PF00672|PF02203|SM00319|PS50885
O32076	yuaG	Uncharacterized protein YuaG	Yes	CytoplasmicMembrane	1	0			@N-terminally anchored (No CS)	Membrane
P80877	metE	5-methyltetrahydropteroyltriglutamate--homocysteine methyltransferase (EC 2.1.1.14) (Cobalamin-independent methionine synthase) (Methionine synthase, vitamin-B12 independent isozyme) (Superoxide-inducible protein 9) (SOI9)		Cytoplasmic	0	0			@Intracellular	Cytoplasmic
P12877	rplE	50S ribosomal protein L5 (BL6)		Cytoplasmic	0	0			@Intracellular	Cytoplasmic
P46922	opuAC	Glycine betaine-binding protein OpuAC	Yes	CytoplasmicMembrane	0	Y		Yes	@Lipid anchored	Extracellular	PS51257
P37808	atpA	ATP synthase subunit alpha (EC 3.6.3.14) (ATP synthase F1 sector subunit alpha) (F-ATPase subunit alpha) (Vegetative protein 100) (VEG100)		Cytoplasmic	0	0			@Intracellular	Cytoplasmic
P25994	pyrAB	Carbamoyl-phosphate synthase pyrimidine-specific large chain (EC 6.3.5.5) (Carbamoyl-phosphate synthetase ammonia chain)		Cytoplasmic	0	0			@Intracellular	Cytoplasmic
P21466	rpsD	30S ribosomal protein S4 (BS4)		Cytoplasmic	0	0			@Intracellular	Cytoplasmic
O34745	yodF	Uncharacterized symporter YodF	Yes	CytoplasmicMembrane	13	0			@Multi-transmembrane	Membrane	GO:0016020|IPR001734|PTHR11819|PS50283|PF00474
P37809	atpD	ATP synthase subunit beta (EC 3.6.3.14) (ATP synthase F1 sector subunit beta) (F-ATPase subunit beta) (Vegetative protein 31) (VEG31)	Yes	CytoplasmicMembrane	0	0			@Intracellular	Cytoplasmic
P23446	flgG	Flagellar basal-body rod protein FlgG (Distal rod protein)		Extracellular	0	0			@Intracellular	Cytoplasmic
P16336	secY	Protein translocase subunit SecY	Yes	CytoplasmicMembrane	9	Y			@Multi-transmembrane	Membrane	GO:0016020|IPR002208|PTHR10906|PS00756|TIGR00967|PS00755|PIRSF004557|PF00344
Q08787	srfAC	Surfactin synthase subunit 3		Cytoplasmic	0	0			@Intracellular	Cytoplasmic
O32156	yurO	Uncharacterized ABC transporter extracellular-binding protein YurO	Yes	CytoplasmicMembrane	0	Y		Yes	@Lipid anchored	Extracellular	PS51257
O34538	ycdA	Uncharacterized lipoprotein YcdA	Yes	Unknown	0	Y		Yes	@Lipid anchored	Extracellular	PS51257
P50866	clpX	ATP-dependent Clp protease ATP-binding subunit ClpX		Cytoplasmic	0	0			@Intracellular	Cytoplasmic
O32247	yvbJ	Uncharacterized membrane protein YvbJ	Yes	Unknown	1	0			@N-terminally anchored (No CS)	Membrane
Q02115	lytR	Transcriptional regulator LytR (Membrane-bound protein LytR)	Yes	CytoplasmicMembrane	1	0			@N-terminally anchored (No CS)	Membrane
O31710	yknX	Putative efflux system component YknX	Yes	Unknown	1	0			@N-terminally anchored (No CS)	Membrane	GO:0016020|IPR006143|TIGR01730
Q9KWU4	pyc	Pyruvate carboxylase (EC 6.4.1.1) (Pyruvic carboxylase) (PYC)		Cytoplasmic	0	0			@Intracellular	Cytoplasmic
Q01465	mreB	Rod shape-determining protein MreB		Cytoplasmic	0	0			@Intracellular	Cytoplasmic
P12042	purL	Phosphoribosylformylglycinamidine synthase 2 (EC 6.3.5.3) (Phosphoribosylformylglycinamidine synthase II) (FGAM synthase II)		Cytoplasmic	0	0			@Intracellular	Cytoplasmic
P26906	dppE	Dipeptide-binding protein DppE	Yes	Cellwall	0	Y			@Lipid anchored	Extracellular	PS51257
P54952	yxeM	Probable amino-acid-binding protein YxeM	Yes	Unknown	0	Y		Yes	@Lipid anchored	Extracellular	PS51257
P31102	aroB	3-dehydroquinate synthase (EC 4.2.3.4)		Cytoplasmic	0	0			@Intracellular	Cytoplasmic
P42199	tcyA	L-cystine-binding protein TcyA	Yes	Unknown	0	Y		Yes	@Lipid anchored	Extracellular	PS51257
O34789	ydjI	Uncharacterized protein YdjI		Unknown	0	0			@Intracellular	Cytoplasmic
P28366	secA	Protein translocase subunit SecA	Yes	Cytoplasmic	0	0			@Intracellular	Cytoplasmic	GO:0016020|IPR011116|IPR011115|IPR011130|IPR020937|G3DSA:1.10.3060.10|PF07517|G3DSA:3.90.1440.10|SM00957|PS01312|SSF81767|SM00958|PF07516|PF01043|SSF81886
P71021	divIVA	Septum site-determining protein DivIVA (Cell division initiation protein DivIVA) (Minicell-associated protein DivIVA)		Cytoplasmic	0	0			@Intracellular	Cytoplasmic
Q06797	rplA	50S ribosomal protein L1 (BL1)		Cytoplasmic	0	0			@Intracellular	Cytoplasmic
O32243	opuCC	Glycine betaine/carnitine/choline-binding protein OpuCC (Osmoprotectant-binding protein)	Yes	CytoplasmicMembrane	0	Y		Yes	@Lipid anchored	Extracellular	PS51257
P46344	yqfF	Uncharacterized protein YqfF	Yes	CytoplasmicMembrane	7	Y			@Multi-transmembrane	Membrane
O34348	yfmC	Fe(3+)-citrate-binding protein YfmC (Ferric-citrate-binding protein)	Yes	CytoplasmicMembrane	0	Y		Yes	@Lipid anchored	Extracellular	PS51257
P19582	hom	Homoserine dehydrogenase (HDH) (EC 1.1.1.3)		Cytoplasmic	0	Y			@Intracellular	Cytoplasmic
P37580	fhuD	Iron(3+)-hydroxamate-binding protein FhuD (Ferric hydroxamate uptake protein D) (Ferrichrome-binding protein) (Iron(III)-hydroxamate-binding protein FhuD)	Yes	CytoplasmicMembrane	0	Y		Yes	@Lipid anchored	Extracellular	PS51257
P39751	mbl	MreB-like protein (Protein mbl)		Cytoplasmic	0	0			@Intracellular	Cytoplasmic
P39912	aroA	Protein AroA(G) [Includes: Phospho-2-dehydro-3-deoxyheptonate aldolase (EC 2.5.1.54) (3-deoxy-D-arabino-heptulosonate 7-phosphate synthase) (DAHP synthase) (Phospho-2-keto-3-deoxyheptonate aldolase); Chorismate mutase (EC 5.4.99.5)]		Cytoplasmic	0	0			@Intracellular	Cytoplasmic
O07021	lutB	Lactate utilization protein B		Cytoplasmic	0	0			@Intracellular	Cytoplasmic
P54616	fabI	Enoyl-[acyl-carrier-protein] reductase [NADH] FabI (ENR) (EC 1.3.1.9) (Cold shock-induced protein 15) (CSI15) (NADH-dependent enoyl-ACP reductase) (Vegetative protein 241) (VEG241)	Yes	CytoplasmicMembrane	0	0			@Intracellular	Cytoplasmic
P16263	odhB	Dihydrolipoyllysine-residue succinyltransferase component of 2-oxoglutarate dehydrogenase complex (EC 2.3.1.61) (2-oxoglutarate dehydrogenase complex component E2) (OGDC-E2) (Dihydrolipoamide succinyltransferase component of 2-oxoglutarate dehydrogenase complex)		Cytoplasmic	0	0			@Intracellular	Cytoplasmic
P21465	rpsC	30S ribosomal protein S3 (BS3) (BS2)		Cytoplasmic	0	0			@Intracellular	Cytoplasmic
P37814	atpF	ATP synthase subunit b (ATP synthase F(0) sector subunit b) (ATPase subunit I) (F-type ATPase subunit b) (F-ATPase subunit b)	Yes	CytoplasmicMembrane	1	0			@N-terminally anchored (No CS)	Membrane	IPR028987|G3DSA:1.20.5.620|SSF81573
P05645	leuB	3-isopropylmalate dehydrogenase (EC 1.1.1.85) (3-IPM-DH) (Beta-IPM dehydrogenase) (IMDH)		Cytoplasmic	0	0			@Intracellular	Cytoplasmic
P34957	qoxA	Quinol oxidase subunit 2 (EC 1.10.3.-) (Oxidase aa(3)-600 subunit 2) (Quinol oxidase aa3-600, subunit QoxA) (Quinol oxidase polypeptide II)	Yes	CytoplasmicMembrane	2	Y		Yes	@Multi-transmembrane(Lipid modified N-termini)	Membrane	GO:0016021|GO:0016020|IPR011759|IPR012141|IPR010514|IPR006332|IPR002429|G3DSA:1.10.287.90|SSF81464|PIRSF000292|PF06481|TIGR01432|PS50857|PS50999|PS51257|PF02790
P21879	guaB	Inosine-5'-monophosphate dehydrogenase (IMP dehydrogenase) (IMPD) (IMPDH) (EC 1.1.1.205) (Superoxide-inducible protein 12) (SOI12)		Cytoplasmic	0	0			@Intracellular	Cytoplasmic
O34774	yobJ	Uncharacterized protein YobJ	Yes	CytoplasmicMembrane	3	0			@Multi-transmembrane	Membrane
O32218	bdbD	Disulfide bond formation protein D (Disulfide oxidoreductase D) (Thiol-disulfide oxidoreductase D)	Yes	CytoplasmicMembrane	1	0			@N-terminally anchored (with CS)	Membrane
P39793	ponA	Penicillin-binding protein 1A/1B (PBP1) [Includes: Penicillin-insensitive transglycosylase (EC 2.4.2.-) (Peptidoglycan TGase); Penicillin-sensitive transpeptidase (EC 3.4.-.-) (DD-transpeptidase)]	Yes	CytoplasmicMembrane	0	Y			@N-terminally anchored (with CS)	Membrane
O31989	yolF	SPBc2 prophage-derived uncharacterized protein YolF	Yes	CytoplasmicMembrane	1	0			@N-terminally anchored (No CS)	Membrane
P17889	infB	Translation initiation factor IF-2		Cytoplasmic	0	0			@Intracellular	Cytoplasmic
P94507	uppP	Undecaprenyl-diphosphatase (EC 3.6.1.27) (Bacitracin resistance protein) (Undecaprenyl pyrophosphate phosphatase)	Yes	CytoplasmicMembrane	7	Y			@Multi-transmembrane	Membrane	GO:0016020|IPR003824|TIGR00753|MF_01006|PF02673
O31774	rny	Ribonuclease Y (RNase Y) (EC 3.1.-.-)	Yes	Cytoplasmic	0	Y			@N-terminally anchored (with CS)	Membrane	GO:0016020|IPR017705|TIGR03319|MF_00335
P37813	atpB	ATP synthase subunit a (ATP synthase F0 sector subunit a) (F-ATPase subunit 6)	Yes	CytoplasmicMembrane	5	0			@Multi-transmembrane	Membrane
P09124	gapA	Glyceraldehyde-3-phosphate dehydrogenase 1 (EC 1.2.1.12) (NAD-dependent glyceraldehyde-3-phosphate dehydrogenase) (GAPDH)		Cytoplasmic	0	0			@Intracellular	Cytoplasmic
O32169	metN	Methionine import ATP-binding protein MetN (EC 3.6.3.-)	Yes	CytoplasmicMembrane	0	0			@Intracellular	Cytoplasmic
P08495	lysC	Aspartokinase 2 (EC 2.7.2.4) (Aspartate kinase 2) (Aspartokinase II)		Cytoplasmic	0	0			@Intracellular	Cytoplasmic
P46920	opuAA	Glycine betaine transport ATP-binding protein OpuAA (EC 3.6.3.32) (Quaternary-amine-transporting ATPase)	Yes	CytoplasmicMembrane	0	0			@Intracellular	Cytoplasmic	GO:0016020|IPR005892|TIGR01186
O07631	typA	GTP-binding protein TypA/BipA homolog	Yes	CytoplasmicMembrane	0	0			@Intracellular	Cytoplasmic
P20282	rpsM	30S ribosomal protein S13 (BS14)		Cytoplasmic	0	0			@Intracellular	Cytoplasmic
P37871	rpoC	DNA-directed RNA polymerase subunit beta' (RNAP subunit beta') (EC 2.7.7.6) (RNA polymerase subunit beta') (Transcriptase subunit beta')		Cytoplasmic	0	0			@Intracellular	Cytoplasmic
P54536	artQ	Arginine transport system permease protein ArtQ	Yes	CytoplasmicMembrane	3	0			@Multi-transmembrane	Membrane	GO:0016020|GO:0016021|IPR000515|IPR010065|PF00528|G3DSA:1.10.3720.10|SSF161098|PS50928|TIGR01726
C0SP94	yhfQ	Putative ABC transporter substrate-binding lipoprotein YhfQ	Yes	CytoplasmicMembrane	0	Y			@Lipid anchored	Extracellular	PS51257
P21464	rpsB	30S ribosomal protein S2 (BS1) (Vegetative protein 209) (VEG209)		Cytoplasmic	0	0			@Intracellular	Cytoplasmic
P42062	appB	Oligopeptide transport system permease protein AppB	Yes	CytoplasmicMembrane	6	0			@Multi-transmembrane	Membrane	GO:0016020|IPR000515|G3DSA:1.10.3720.10|SSF161098|PS50928|PF00528
P37870	rpoB	DNA-directed RNA polymerase subunit beta (RNAP subunit beta) (EC 2.7.7.6) (RNA polymerase subunit beta) (Transcriptase subunit beta)		Cytoplasmic	0	0			@Intracellular	Cytoplasmic
P54941	yxeB	Iron(3+)-hydroxamate-binding protein YxeB (Ferric hydroxamate uptake protein YxeB) (Iron(III)-hydroxamate-binding protein YxeB)	Yes	CytoplasmicMembrane	0	Y		Yes	@Lipid anchored	Extracellular	PS51257
P37571	clpC	Negative regulator of genetic competence ClpC/MecB		Cytoplasmic	0	0			@Intracellular	Cytoplasmic
P54617	ydjF	Phage shock protein A homolog	Yes	CytoplasmicMembrane	0	0			@Intracellular	Cytoplasmic
P80866	yurY	Vegetative protein 296 (VEG296)		Cytoplasmic	0	0			@Intracellular	Cytoplasmic
O34784	yobI	Uncharacterized membrane protein YobI	Yes	Cytoplasmic	2	0			@Multi-transmembrane	Membrane
P24139	oppC	Oligopeptide transport system permease protein OppC (Stage 0 sporulation protein KC)	Yes	CytoplasmicMembrane	6	0			@Multi-transmembrane	Membrane	GO:0016020|IPR000515|G3DSA:1.10.3720.10|PS50928|PF00528|SSF161098
Q01625	misCA	Membrane protein insertase MisCA (Foldase YidC 2) (Membrane integrase YidC 2) (Membrane protein YidC 2) (Stage III sporulation protein J) (SpoIIIJ)	Yes	CytoplasmicMembrane	5	Y		Yes	@Multi-transmembrane(Lipid modified N-termini)	Membrane	GO:0016021|IPR023060|IPR001708|IPR028055|MF_01811|PR00701|PTHR12428|PS51257|PR01900|TIGR03592|PF02096
O34876	ftsX	Cell division protein FtsX	Yes	CytoplasmicMembrane	4	0			@Multi-transmembrane	Membrane	GO:0016020|GO:0016021|IPR003838|IPR004513|PF02687|PIRSF003097
O35005	ytrF	ABC transporter permease YtrF	Yes	CytoplasmicMembrane	4	0			@Multi-transmembrane(Lipid modified N-termini)	Membrane	GO:0016020|IPR003838|PF02687|PS51257
P96614	cshA	DEAD-box ATP-dependent RNA helicase CshA (EC 3.6.4.13)		Cytoplasmic	0	0			@Intracellular	Cytoplasmic
O32038	aspS	Aspartate--tRNA ligase (EC 6.1.1.12) (Aspartyl-tRNA synthetase) (AspRS)		Cytoplasmic	0	0			@Intracellular	Cytoplasmic
P50735	gudB	Cryptic catabolic NAD-specific glutamate dehydrogenase GudB (NAD-GDH) (EC 1.4.1.2)		Cytoplasmic	0	0			@Intracellular	Cytoplasmic
P39120	citZ	Citrate synthase 2 (EC 2.3.3.1) (Citrate synthase II)		Cytoplasmic	0	0			@Intracellular	Cytoplasmic
P28611	motA	Motility protein A (Chemotaxis protein MotA)	Yes	CytoplasmicMembrane	3	Y			@Multi-transmembrane	Membrane	GO:0016020|IPR002898|PF01618
O05253	yufO	Uncharacterized ABC transporter ATP-binding protein YufO	Yes	CytoplasmicMembrane	0	0			@Intracellular	Cytoplasmic
P71067	lutP	L-lactate permease	Yes	CytoplasmicMembrane	14	0			@Multi-transmembrane	Membrane	GO:0005887|IPR003804|PTHR30003:SF0|PF02652|TIGR00795
O34894	ezrA	Septation ring formation regulator EzrA	Yes	CytoplasmicMembrane	0	Y			@N-terminally anchored (No CS)	Membrane	GO:0016021|IPR010379|PF06160|MF_00728
P39217	tlpB	Methyl-accepting chemotaxis protein TlpB	Yes	CytoplasmicMembrane	1	Y			@Multi-transmembrane	Membrane	GO:0016021|GO:0016020|IPR003660|IPR003122|IPR004089|SM00304|SM00319|PF00015|PF00672|SM00283|PF02203|PS50885|PS50111
Q99027	comP	Sensor histidine kinase ComP (EC 2.7.13.3)	Yes	CytoplasmicMembrane	10	0			@Multi-transmembrane	Membrane	GO:0016021|IPR011712|PF07730
O34347	argG	Argininosuccinate synthase (EC 6.3.4.5) (Citrulline--aspartate ligase)		Cytoplasmic	0	0			@Intracellular	Cytoplasmic
P42065	appF	Oligopeptide transport ATP-binding protein AppF	Yes	CytoplasmicMembrane	0	0			@Intracellular	Cytoplasmic	GO:0016020|IPR010066|TIGR01727
O07621	hemAT	Heme-based aerotactic transducer HemAT	Yes	CytoplasmicMembrane	0	0			@Intracellular	Cytoplasmic	GO:0016020|IPR004089|SM00283|PS50111|PF00015
P08838	ptsI	Phosphoenolpyruvate-protein phosphotransferase (EC 2.7.3.9) (Phosphotransferase system, enzyme I)		Cytoplasmic	0	0			@Intracellular	Cytoplasmic
P42923	rplJ	50S ribosomal protein L10 (BL5) (Cold acclimatization protein) (CAP) (Vegetative protein 300) (VEG300)		Cytoplasmic	0	0			@Intracellular	Cytoplasmic
O34833	yceH	Uncharacterized protein YceH		Cytoplasmic	0	0			@Intracellular	Cytoplasmic
P39148	glyA	Serine hydroxymethyltransferase (SHMT) (Serine methylase) (EC 2.1.2.1)		Cytoplasmic	0	0			@Intracellular	Cytoplasmic
P18185	carB	Carbamoyl-phosphate synthase arginine-specific large chain (EC 6.3.5.5) (Carbamoyl-phosphate synthetase ammonia chain)		Cytoplasmic	0	0			@Intracellular	Cytoplasmic
O06967	bmrA	Multidrug resistance ABC transporter ATP-binding/permease protein BmrA (EC 3.6.3.-)	Yes	CytoplasmicMembrane	6	0			@Multi-transmembrane	Membrane	GO:0016021|IPR011527|PF00664|SSF90123|PS50929
P18255	thrS	Threonine--tRNA ligase 1 (EC 6.1.1.3) (Threonyl-tRNA synthetase 1) (ThrRS 1)		Cytoplasmic	0	0			@Intracellular	Cytoplasmic
P16524	patA	Putative N-acetyl-LL-diaminopimelate aminotransferase (EC 2.6.1.-) (Putative aminotransferase A)		Cytoplasmic	0	0			@Intracellular	Cytoplasmic
P16971	recA	Protein RecA (Recombinase A)		Cytoplasmic	0	0			@Intracellular	Cytoplasmic
P42921	rplD	50S ribosomal protein L4		Unknown	0	0			@Intracellular	Cytoplasmic
P28612	motB	Motility protein B (Chemotaxis protein MotB)	Yes	CytoplasmicMembrane	1	0			@N-terminally anchored (No CS)	Membrane	IPR006665|IPR025713|G3DSA:3.30.1330.60|PF13677|PS51123|PF00691|SSF103088
P96672	ydeO	UPF0750 membrane protein YdeO	Yes	CytoplasmicMembrane	5	0			@Multi-transmembrane	Membrane	IPR003740|PIRSF006483|PF02588
P28598	groL	60 kDa chaperonin (GroEL protein) (Protein Cpn60) (Stress protein H5)		Cytoplasmic	0	0			@Intracellular	Cytoplasmic
C0SP98	ykfD	Putative oligopeptide transport ATP-binding protein YkfD (EC 3.6.3.-)	Yes	CytoplasmicMembrane	0	0			@Intracellular	Cytoplasmic	GO:0016020|IPR010066|TIGR01727
O07020	lutA	Lactate utilization protein A	Yes	CytoplasmicMembrane	0	Y			@Intracellular	Cytoplasmic
P17820	dnaK	Chaperone protein DnaK (HSP70) (Heat shock 70 kDa protein) (Heat shock protein 70)		Cytoplasmic	0	0			@Intracellular	Cytoplasmic
O34454	ykaA	UPF0111 protein YkaA		Cytoplasmic	0	0			@Intracellular	Cytoplasmic
P49814	mdh	Malate dehydrogenase (EC 1.1.1.37) (Vegetative protein 69) (VEG69)	Yes	Unknown	0	Y			@N-terminally anchored (No CS)	Membrane
O32259	lutC	Lactate utilization protein C		Unknown	0	0			@Intracellular	Cytoplasmic
P42063	appC	Oligopeptide transport system permease protein AppC	Yes	CytoplasmicMembrane	5	0			@Multi-transmembrane	Membrane	GO:0016020|IPR000515|PS50928|PF00528|SSF161098|G3DSA:1.10.3720.10
P29072	cheA	Chemotaxis protein CheA (EC 2.7.13.3)		Cytoplasmic	0	0			@Intracellular	Cytoplasmic
P54537	artM	Arginine transport ATP-binding protein ArtM	Yes	CytoplasmicMembrane	0	0			@Intracellular	Cytoplasmic
P80886	sucC	Succinyl-CoA ligase [ADP-forming] subunit beta (EC 6.2.1.5) (Succinyl-CoA synthetase subunit beta) (SCS-beta) (Vegetative protein 63) (VEG63)		Cytoplasmic	0	0			@Intracellular	Cytoplasmic
P37251	ilvB	Acetolactate synthase large subunit (AHAS) (EC 2.2.1.6) (Acetohydroxy-acid synthase large subunit) (ALS) (Vegetative protein 105) (VEG105)		Cytoplasmic	0	0			@Intracellular	Cytoplasmic
O31754	rasP	Regulator of sigma-W protease RasP (EC 3.4.24.-) (Regulating anti-sigma-W factor activity protease) (S2P endopeptidase) (Site-2 protease RseP) (S2P protease RseP) (Site-2-type intramembrane protease) (Zinc metalloprotease RasP)	Yes	CytoplasmicMembrane	4	0			@Multi-transmembrane	Membrane	GO:0016021|IPR004387|TIGR00054
P19669	tal	Transaldolase (EC 2.2.1.2) (20 kDa phosphoprotein OrfU) (CSI9)		Cytoplasmic	0	0			@Intracellular	Cytoplasmic
P71012	fruA	PTS system fructose-specific EIIABC component (EIIABC-Fru) [Includes: Fructose-specific phosphotransferase enzyme IIA component (EC 2.7.1.-) (EII-Fru) (PTS system fructose-specific EIIA component); Fructose-specific phosphotransferase enzyme IIB component (EC 2.7.1.69) (EIII-Fru) (PTS system fructose-specific EIIB component); Fructose permease IIC component (PTS system fructose-specific EIIC comp…	Yes	CytoplasmicMembrane	9	0			@Multi-transmembrane	Membrane	GO:0016021|GO:0016020|IPR004715|IPR006327|IPR003352|TIGR00848|TIGR01427|PF02378
P37527	pdxS	Pyridoxal biosynthesis lyase PdxS (EC 4.-.-.-) (Superoxide-inducible protein 7) (SOI7)		Cytoplasmic	0	0			@Intracellular	Cytoplasmic
P45861	ywjA	Uncharacterized ABC transporter ATP-binding protein YwjA	Yes	CytoplasmicMembrane	6	0			@Multi-transmembrane	Membrane	GO:0016021|IPR011527|PS50929|SSF90123|PF00664
P42060	rplV	50S ribosomal protein L22		Cytoplasmic	0	0			@Intracellular	Cytoplasmic
P23447	fliF	Flagellar M-ring protein	Yes	CytoplasmicMembrane	2	0			@Multi-transmembrane	Membrane
O07585	yhdP	UPF0053 protein YhdP	Yes	CytoplasmicMembrane	4	0			@Multi-transmembrane(Lipid modified N-termini)	Membrane
O34742	opuCD	Glycine betaine/carnitine/choline transport system permease protein OpuCD	Yes	CytoplasmicMembrane	5	0			@Multi-transmembrane	Membrane	GO:0016020|IPR000515|G3DSA:1.10.3720.10|PF00528|PS50928|SSF161098
P37949	lepA	Elongation factor 4 (EF-4) (EC 3.6.5.n1) (Ribosomal back-translocase LepA)	Yes	CytoplasmicMembrane	0	0			@Intracellular	Cytoplasmic
O31847	yozO	Uncharacterized protein YozO		Unknown	0	0			@Intracellular	Cytoplasmic
O05503	ydhK	Uncharacterized protein YdhK	Yes	Unknown	0	Y		Yes	@Lipid anchored	Extracellular
P12048	purH	Bifunctional purine biosynthesis protein PurH [Includes: Phosphoribosylaminoimidazolecarboxamide formyltransferase (EC 2.1.2.3) (AICAR transformylase); IMP cyclohydrolase (EC 3.5.4.10) (ATIC) (IMP synthase) (Inosinicase)]		Cytoplasmic	0	0			@Intracellular	Cytoplasmic
O34507	prkC	Serine/threonine-protein kinase PrkC (Ser/Thr-protein kinase PrkC) (EC 2.7.11.1)	Yes	CytoplasmicMembrane	1	0			@Intracellular /TMH start AFTER 60	Cytoplasmic
P09339	citB	Aconitate hydratase (Aconitase) (EC 4.2.1.3) (Citrate hydro-lyase)		Cytoplasmic	0	0			@Intracellular	Cytoplasmic
P37945	lon1	Lon protease 1 (EC 3.4.21.53) (ATP-dependent protease La 1)		Cytoplasmic	0	0			@Intracellular	Cytoplasmic
O32052	yrbF	UPF0092 membrane protein YrbF	Yes	CytoplasmicMembrane	1	0			@N-terminally anchored (No CS)	Membrane
P55873	rplT	50S ribosomal protein L20		Cytoplasmic	0	0			@Intracellular	Cytoplasmic
O32157	frlB	Fructosamine deglycase FrlB (EC 3.5.-.-)		Cytoplasmic	0	0			@Intracellular	Cytoplasmic
Q07868	pbpB	Penicillin-binding protein 2B (PBP-2B) (Penicillin-binding protein B)	Yes	CytoplasmicMembrane	0	Y			@N-terminally anchored (No CS)	Membrane
P32399	yhgE	Uncharacterized protein YhgE (ORFB)	Yes	CytoplasmicMembrane	6	0			@Multi-transmembrane	Membrane
P39596	efeM	Probable iron uptake system component EfeM	Yes	Cytoplasmic	0	Y		Yes	@N-terminally anchored (No CS)	Membrane
P17865	ftsZ	Cell division protein FtsZ		Unknown	0	0			@Intracellular	Cytoplasmic
P37874	ygxB	Uncharacterized protein YgxB (ORF1)	Yes	CytoplasmicMembrane	11	0			@Multi-transmembrane	Membrane
O07576	yhdG	Uncharacterized amino acid permease YhdG	Yes	CytoplasmicMembrane	13	0			@Multi-transmembrane	Membrane	GO:0016020|IPR002293|PTHR11785|PF13520|PIRSF006060
P39576	ilvK	Branched-chain-amino-acid aminotransferase 2 (BCAT 2) (EC 2.6.1.42) (Vegetative protein 85) (VEG85)		Cytoplasmic	0	0			@Intracellular	Cytoplasmic
O34442	mgtE	Magnesium transporter MgtE	Yes	CytoplasmicMembrane	5	0			@Multi-transmembrane	Membrane	GO:0016020|IPR006669|IPR006667|TIGR00400|G3DSA:1.10.357.20|PF01769
O34752	lgt	Prolipoprotein diacylglyceryl transferase (EC 2.4.99.-) (Spore germination protein GerF)	Yes	CytoplasmicMembrane	7	0			@Multi-transmembrane	Membrane	GO:0016020|IPR001640|MF_01147|PF01790|PS01311|TIGR00544
O34666	ctpA	Carboxy-terminal processing protease CtpA (C-terminal processing protease) (EC 3.4.21.102)	Yes	CytoplasmicMembrane	0	Y			@N-terminally anchored (with CS)	Membrane
P42086	pbuX	Xanthine permease	Yes	CytoplasmicMembrane	13	0			@Multi-transmembrane	Membrane	GO:0016020|GO:0016021|IPR006042|IPR006043|IPR017588|TIGR00801|PTHR11119|PTHR11119:SF12|PF00860|PS01116
O32031	yrrS	Uncharacterized membrane protein YrrS	Yes	Unknown	1	0			@N-terminally anchored (No CS)	Membrane
O34529	pfkA	6-phosphofructokinase (Phosphofructokinase) (EC 2.7.1.11) (Phosphohexokinase)		Cytoplasmic	0	0			@Intracellular	Cytoplasmic
P71088	spo0M	Sporulation-control protein spo0M (Stage 0 sporulation protein M)		Cytoplasmic	0	0			@Intracellular	Cytoplasmic
P42971	pbpC	Penicillin-binding protein 3 (PBP 3) (PSPB20) (Penicillin-binding protein C)	Yes	CytoplasmicMembrane	0	Y		Yes	@Lipid anchored	Extracellular	PS51257
O32246	yvbI	Uncharacterized protein YvbI	Yes	CytoplasmicMembrane	5	0			@Multi-transmembrane	Membrane	PD113106
P21882	pdhB	Pyruvate dehydrogenase E1 component subunit beta (EC 1.2.4.1) (S complex, 36 kDa subunit)	Yes	CytoplasmicMembrane	0	0			@Intracellular	Cytoplasmic
P12425	glnA	Glutamine synthetase (EC 6.3.1.2) (Glutamate--ammonia ligase)		Cytoplasmic	0	0			@Intracellular	Cytoplasmic
O31425	skfC	Sporulation-killing factor biosynthesis protein SkfC	Yes	CytoplasmicMembrane	8	0			@Multi-transmembrane	Membrane	GO:0016020|IPR003675|PF02517
P37105	ffh	Signal recognition particle protein (Fifty-four homolog)	Yes	CytoplasmicMembrane	0	0			@Intracellular	Cytoplasmic
P12047	purB	Adenylosuccinate lyase (ASL) (EC 4.3.2.2) (Adenylosuccinase) (ASase) (Glutamyl--tRNA ligase regulatory factor)		Cytoplasmic	0	0			@Intracellular	Cytoplasmic
P40780	ytxH	Uncharacterized protein YtxH	Yes	Unknown	1	0			@N-terminally anchored (No CS)	Membrane
O34987	pbuG	Guanine/hypoxanthine permease PbuG	Yes	CytoplasmicMembrane	13	0			@Multi-transmembrane	Membrane	GO:0016020|IPR006043|PF00860|PTHR11119
P71018	plsX	Phosphate acyltransferase (EC 2.3.1.n2) (Acyl-ACP phosphotransacylase) (Acyl-[acyl-carrier-protein]--phosphate acyltransferase) (Phosphate-acyl-ACP acyltransferase)		Cytoplasmic	0	0			@Intracellular	Cytoplasmic
P24011	ctaC	Cytochrome c oxidase subunit 2 (EC 1.9.3.1) (Caa-3605 subunit 2) (Cytochrome aa3 subunit 2) (Cytochrome c oxidase polypeptide II) (Oxidase aa(3) subunit 2)	Yes	CytoplasmicMembrane	2	Y		Yes	@Multi-transmembrane(Lipid modified N-termini)	Membrane	GO:0016021|GO:0016020|IPR011759|IPR014222|IPR002429|PS50999|PF02790|TIGR02866|PS50857|G3DSA:1.10.287.90|PS51257|PF00116|SSF81464
P21472	rpsL	30S ribosomal protein S12 (BS12)		Cytoplasmic	0	0			@Intracellular	Cytoplasmic
P51831	fabG	3-oxoacyl-[acyl-carrier-protein] reductase FabG (EC 1.1.1.100) (3-ketoacyl-acyl carrier protein reductase) (Beta-Ketoacyl-acyl carrier protein reductase) (Beta-ketoacyl-ACP reductase)		Cytoplasmic	0	0			@Intracellular	Cytoplasmic
P96605	ydbJ	Uncharacterized ABC transporter ATP-binding protein YdbJ	Yes	CytoplasmicMembrane	0	0			@Intracellular	Cytoplasmic
P37810	atpG	ATP synthase gamma chain (ATP synthase F1 sector gamma subunit) (F-ATPase gamma subunit)		Unknown	0	0			@Intracellular	Cytoplasmic
P80875	yceD	General stress protein 16U (GSP16U)		Cytoplasmic	0	0			@Intracellular	Cytoplasmic
O31942	yonS	SPBc2 prophage-derived uncharacterized lipoprotein YonS	Yes	Unknown	0	Y		Yes	@Lipid anchored	Extracellular	PS51257
P39816	gamP	Putative PTS system glucosamine-specific EIICBA component [Includes: Glucosamine permease IIC component (PTS system glucosamine-specific EIIC component); Glucosamine-specific phosphotransferase enzyme IIB component (EC 2.7.1.69) (PTS system glucosamine-specific EIIB component); Glucosamine-specific phosphotransferase enzyme IIA component (EC 2.7.1.-) (PTS system glucosamine-specific EIIA componen…	Yes	CytoplasmicMembrane	9	0			@Multi-transmembrane	Membrane	GO:0016021|GO:0016020|IPR011299|IPR003352|TIGR02002|PF02378
P55339	ecsA	ABC-type transporter ATP-binding protein EcsA	Yes	CytoplasmicMembrane	0	0			@Intracellular	Cytoplasmic
P80700	tsf	Elongation factor Ts (EF-Ts)		Cytoplasmic	0	0			@Intracellular	Cytoplasmic
P26903	dppB	Dipeptide transport system permease protein DppB	Yes	CytoplasmicMembrane	6	0			@Multi-transmembrane	Membrane	GO:0016020|IPR000515|SSF161098|PS50928|PF00528|G3DSA:1.10.3720.10
P37494	yybJ	Uncharacterized ABC transporter ATP-binding protein YybJ	Yes	CytoplasmicMembrane	0	0			@Intracellular	Cytoplasmic
P54519	yqhY	Uncharacterized protein YqhY		Cytoplasmic	0	0			@Intracellular	Cytoplasmic
P12046	purC	Phosphoribosylaminoimidazole-succinocarboxamide synthase (EC 6.3.2.6) (SAICAR synthetase) (Vegetative protein 286A) (VEG286A)		Cytoplasmic	0	0			@Intracellular	Cytoplasmic
P39216	tlpA	Methyl-accepting chemotaxis protein TlpA	Yes	CytoplasmicMembrane	1	Y			@Multi-transmembrane	Membrane	GO:0016020|GO:0016021|IPR004089|IPR003122|IPR003660|SM00283|SM00319|PS50885|PS50111|PF00015|PF02203|SM00304|PF00672
Q45593	yydI	Probable peptide export ATP-binding protein YydI	Yes	CytoplasmicMembrane	0	0			@Intracellular	Cytoplasmic
O34525	sppA	Putative signal peptide peptidase SppA (EC 3.4.21.-)	Yes	CytoplasmicMembrane	1	0			@N-terminally anchored (with CS)	Membrane
P37869	eno	Enolase (EC 4.2.1.11) (2-phospho-D-glycerate hydro-lyase) (2-phosphoglycerate dehydratase)		Cytoplasmic	0	0			@Intracellular	Cytoplasmic
O34725	yjhA	Uncharacterized lipoprotein YjhA	Yes	Unknown	0	Y		Yes	@Lipid anchored	Extracellular	PS51257
O32151	yurJ	Uncharacterized ABC transporter ATP-binding protein YurJ (EC 3.6.3.-)	Yes	CytoplasmicMembrane	0	0			@Intracellular	Cytoplasmic
P96499	yvhJ	Putative transcriptional regulator YvhJ	Yes	CytoplasmicMembrane	0	Y			@N-terminally anchored (No CS)	Membrane
O34629	yerH	Uncharacterized lipoprotein YerH	Yes	Unknown	0	Y		Yes	@Lipid anchored	Extracellular	PS51257
P14193	prs	Ribose-phosphate pyrophosphokinase (RPPK) (EC 2.7.6.1) (Phosphoribosyl pyrophosphate synthase) (P-Rib-PP synthase) (PRPP synthase)		Cytoplasmic	0	0			@Intracellular	Cytoplasmic
O34572	ykoC	Putative HMP/thiamine permease protein YkoC	Yes	CytoplasmicMembrane	5	0			@Multi-transmembrane	Membrane	IPR003339|PF02361
P13485	tagF	CDP-glycerol:poly(glycerophosphate) glycerophosphotransferase (EC 2.7.8.12) (CGPTase) (Major teichoic acid biosynthesis protein F) (Polyglycerol phosphate polymerase)	Yes	CytoplasmicMembrane	0	0			@Intracellular	Cytoplasmic	GO:0016020|IPR007554|PF04464
P37566	yacD	Putative peptidyl-prolyl cis-trans isomerase YacD (PPIase YacD) (EC 5.2.1.8) (Rotamase YacD)	Yes	CytoplasmicMembrane	0	Y			@N-terminally anchored (with CS)	Membrane
O31742	rplS	50S ribosomal protein L19		Cytoplasmic	0	0			@Intracellular	Cytoplasmic
P49787	accC1	Biotin carboxylase 1 (EC 6.3.4.14) (Acetyl-CoA carboxylase subunit A 1) (ACC 1) (EC 6.4.1.2)		Cytoplasmic	0	0			@Intracellular	Cytoplasmic
P71013	sipT	Signal peptidase I T (SPase I) (EC 3.4.21.89) (Leader peptidase I)	Yes	CytoplasmicMembrane	1	0			@N-terminally anchored (No CS)	Membrane	GO:0016020|GO:0016021|IPR000223|IPR019757|IPR019758|IPR019756|TIGR02227|PS00760|PS00761|PS00501|PTHR12383|PR00727
Q08430	kinB	Sporulation kinase B (EC 2.7.13.3)	Yes	CytoplasmicMembrane	6	0			@Multi-transmembrane(Lipid modified N-termini)	Membrane	GO:0016020|IPR003661|PF00512|G3DSA:1.10.287.130|SM00388
O34814	ftsE	Cell division ATP-binding protein FtsE	Yes	CytoplasmicMembrane	0	0			@Intracellular	Cytoplasmic
O34864	yoaB	Putative transporter YoaB	Yes	CytoplasmicMembrane	11	Y			@Multi-transmembrane	Membrane	GO:0016021|IPR011701|IPR004748|PF07690|TIGR00897
P80244	clpP	ATP-dependent Clp protease proteolytic subunit (EC 3.4.21.92) (Caseinolytic protease) (Endopeptidase Clp) (Stress protein G7)	Yes	Cytoplasmic	1	0			@Intracellular	Cytoplasmic
P12879	rpsH	30S ribosomal protein S8 (BS8)		Cytoplasmic	0	0			@Intracellular	Cytoplasmic
O31657	htpX	Protease HtpX homolog (EC 3.4.24.-)	Yes	CytoplasmicMembrane	4	0			@Multi-transmembrane	Membrane	GO:0016020|IPR001915|PF01435
P54179	ypmS	Uncharacterized protein YpmS	Yes	CytoplasmicMembrane	1	0			@Secretory(released) (with CS)	Extracellular
Q45614	yycG	Sensor histidine kinase YycG (EC 2.7.13.3)	Yes	CytoplasmicMembrane	2	0			@Multi-transmembrane	Membrane	GO:0016020|GO:0016021|IPR003661|IPR003660|PF00512|PF00672|PS50885|SM00388|SM00304|G3DSA:1.10.287.130
O34764	sat	Sulfate adenylyltransferase (EC 2.7.7.4) (ATP-sulfurylase) (Sulfate adenylate transferase) (SAT)		Cytoplasmic	0	0			@Intracellular	Cytoplasmic
P28264	ftsA	Cell division protein FtsA		Cytoplasmic	0	0			@Intracellular	Cytoplasmic
O34424	yteJ	Uncharacterized membrane protein YteJ	Yes	CytoplasmicMembrane	2	0			@Multi-transmembrane	Membrane
O30509	gatB	Aspartyl/glutamyl-tRNA(Asn/Gln) amidotransferase subunit B (Asp/Glu-ADT subunit B) (EC 6.3.5.-)		Cytoplasmic	0	0			@Intracellular	Cytoplasmic
P46921	opuAB	Glycine betaine transport system permease protein OpuAB	Yes	CytoplasmicMembrane	7	0			@Multi-transmembrane	Membrane	GO:0016020|IPR000515|G3DSA:1.10.3720.10|PF00528|SSF161098|PS50928
O31749	pyrH	Uridylate kinase (UK) (EC 2.7.4.22) (Uridine monophosphate kinase) (UMP kinase) (UMPK)		Unknown	0	0			@Intracellular	Cytoplasmic
P46349	gabP	GABA permease (4-amino butyrate transport carrier) (Gamma-aminobutyrate permease)	Yes	CytoplasmicMembrane	12	0			@Multi-transmembrane	Membrane	GO:0016020|GO:0016021|IPR004841|IPR002293|IPR011265|IPR004840|PF00324|PIRSF006060|PTHR11785|TIGR01773|PS00218
O31620	thiD	Hydroxymethylpyrimidine/phosphomethylpyrimidine kinase (EC 2.7.1.49) (EC 2.7.4.7) (Hydroxymethylpyrimidine kinase) (HMP kinase) (Hydroxymethylpyrimidine phosphate kinase) (HMP-P kinase) (HMP-phosphate kinase) (HMPP kinase)		Cytoplasmic	0	0			@Intracellular	Cytoplasmic
P55340	ecsB	Protein EcsB	Yes	CytoplasmicMembrane	10	0			@Multi-transmembrane	Membrane	GO:0016021|IPR010288|PIRSF037259|PF05975
Q794W0	yycH	Two-component system YycF/YycG regulatory protein YycH	Yes	CytoplasmicMembrane	1	0			@N-terminally anchored (No CS)	Membrane
P42064	appD	Oligopeptide transport ATP-binding protein AppD	Yes	CytoplasmicMembrane	0	0			@Intracellular	Cytoplasmic	GO:0016020|IPR010066|TIGR01727
O34399	gltB	Glutamate synthase [NADPH] small chain (EC 1.4.1.13) (NADPH-GOGAT)		Cytoplasmic	0	0			@Intracellular	Cytoplasmic
P35620	flhA	Flagellar biosynthesis protein FlhA	Yes	CytoplasmicMembrane	7	0			@Multi-transmembrane	Membrane	GO:0016021|GO:0016020|IPR006301|IPR001712|TIGR01398|PIRSF005419|PF00771|PR00949
P46918	ggaB	Minor teichoic acid biosynthesis protein GgaB	Yes	Cytoplasmic	0	0	1		@Intracellular	Cytoplasmic	GO:0016020|IPR007554|PF04464
P23545	phoR	Alkaline phosphatase synthesis sensor protein PhoR (EC 2.7.13.3)	Yes	CytoplasmicMembrane	2	0			@Multi-transmembrane	Membrane	GO:0016020|IPR003661|SM00388|PF00512|G3DSA:1.10.287.130
P40409	feuA	Iron-uptake system-binding protein	Yes	CytoplasmicMembrane	0	Y		Yes	@Lipid anchored	Extracellular	PS51257
P14577	rplP	50S ribosomal protein L16		Cytoplasmic	0	0			@Intracellular	Cytoplasmic
O06478	yfmT	Putative aldehyde dehydrogenase YfmT (EC 1.2.1.3)		Cytoplasmic	0	0			@Intracellular	Cytoplasmic
O31446	ybfF	Uncharacterized protein YbfF	Yes	CytoplasmicMembrane	4	0			@Multi-transmembrane	Membrane
P45708	yneF	UPF0154 protein YneF	Yes	CytoplasmicMembrane	1	0			@N-terminally anchored (No CS)	Membrane	IPR005359|PD048972
P24138	oppB	Oligopeptide transport system permease protein OppB (Stage 0 sporulation protein KB)	Yes	CytoplasmicMembrane	6	0			@Multi-transmembrane	Membrane	GO:0016020|IPR000515|SSF161098|PF00528|PS50928|G3DSA:1.10.3720.10
O34878	opuCB	Glycine betaine/carnitine/choline transport system permease protein OpuCB	Yes	CytoplasmicMembrane	5	0			@Multi-transmembrane	Membrane	GO:0016020|IPR000515|G3DSA:1.10.3720.10|SSF161098|PS50928|PF00528
P39578	dltD	Protein DltD	Yes	Unknown	0	Y			@N-terminally anchored (No CS)	Membrane
P17731	hisC	Histidinol-phosphate aminotransferase (EC 2.6.1.9) (Imidazole acetol-phosphate transaminase)		Cytoplasmic	0	0			@Intracellular	Cytoplasmic
P37887	cysK	Cysteine synthase (CSase) (EC 2.5.1.47) (O-acetylserine (thiol)-lyase) (OAS-TL) (Superoxide-inducible protein 11) (SOI11)		Cytoplasmic	0	0			@Intracellular	Cytoplasmic
P40779	ytxG	UPF0478 protein YtxG	Yes	CytoplasmicMembrane	1	0			@N-terminally anchored (No CS)	Membrane
P39772	asnS	Asparagine--tRNA ligase (EC 6.1.1.22) (Asparaginyl-tRNA synthetase) (AsnRS)		Cytoplasmic	0	0			@Intracellular	Cytoplasmic
O31771	ymfM	Uncharacterized membrane protein YmfM	Yes	Unknown	1	0			@Intracellular /TMH start AFTER 60	Cytoplasmic
P23966	menB	1,4-Dihydroxy-2-naphthoyl-CoA synthase (DHNA-CoA synthase) (EC 4.1.3.36)		Cytoplasmic	0	0			@Intracellular	Cytoplasmic
P96706	ydgH	Putative membrane protein YdgH	Yes	CytoplasmicMembrane	11	Y			@Multi-transmembrane	Membrane	GO:0016020|GO:0016021|IPR004869|IPR000731|PF03176|PS50156
P37484	yybT	Uncharacterized protein YybT	Yes	Unknown	2	0			@Multi-transmembrane	Membrane
Q45600	yydB	Uncharacterized metallophosphoesterase-like protein YydB		Cytoplasmic	0	0			@Intracellular	Cytoplasmic
P46208	htpG	Chaperone protein HtpG (Heat shock protein HtpG) (High temperature protein G)		Cytoplasmic	0	0			@Intracellular	Cytoplasmic
P08877	ptsH	Phosphocarrier protein HPr (EC 2.7.11.-) (Histidine-containing protein)		Cytoplasmic	0	0			@Intracellular	Cytoplasmic
O34375	minJ	Cell division topological determinant MinJ	Yes	CytoplasmicMembrane	8	0			@Multi-transmembrane	Membrane
O34743	ylbA	Uncharacterized protein YlbA		Cytoplasmic	0	0			@Intracellular	Cytoplasmic
O34738	ykoE	Putative HMP/thiamine permease protein YkoE	Yes	CytoplasmicMembrane	6	0			@Multi-transmembrane	Membrane
P06534	spo0A	Stage 0 sporulation protein A (Stage 0 sporulation protein C) (Stage 0 sporulation protein G)		Cytoplasmic	0	0			@Intracellular	Cytoplasmic
P40750	pbpD	Penicillin-binding protein 4 (PBP 4)	Yes	CytoplasmicMembrane	0	Y	1		@N-terminally anchored (No CS)	Membrane
P13243	fbaA	Probable fructose-bisphosphate aldolase (FBP aldolase) (FBPA) (EC 4.1.2.13) (Fructose-1,6-bisphosphate aldolase)		Cytoplasmic	0	0			@Intracellular	Cytoplasmic
O34758	yrrL	UPF0755 protein YrrL	Yes	Unknown	1	0			@N-terminally anchored (No CS)	Membrane
P54592	yhcH	Uncharacterized ABC transporter ATP-binding protein YhcH	Yes	CytoplasmicMembrane	0	0			@Intracellular	Cytoplasmic
P28628	sipS	Signal peptidase I S (SPase I) (EC 3.4.21.89) (Leader peptidase I)	Yes	CytoplasmicMembrane	0	Y			@N-terminally anchored (No CS)	Membrane	GO:0016021|GO:0016020|IPR019758|IPR000223|IPR019757|IPR019756|PS00761|PTHR12383|PR00727|TIGR02227|PS00760|PS00501
P54510	yqhL	Uncharacterized protein YqhL	Yes	Cytoplasmic	1	0			@N-terminally anchored (No CS)	Membrane
P54598	yhcN	Lipoprotein YhcN	Yes	Unknown	0	Y		Yes	@Lipid anchored	Extracellular	IPR014247|IPR019076|TIGR02898|PF09580|PS51257
Q02112	lytA	Membrane-bound protein LytA	Yes	CytoplasmicMembrane	0	Y		Yes	@Lipid anchored	Extracellular	PS51257
P20429	rpoA	DNA-directed RNA polymerase subunit alpha (RNAP subunit alpha) (EC 2.7.7.6) (RNA polymerase subunit alpha) (Transcriptase subunit alpha)		Cytoplasmic	0	0			@Intracellular	Cytoplasmic
Q9KWZ1	nadA	Quinolinate synthase A (EC 2.5.1.72)		Cytoplasmic	0	0			@Intracellular	Cytoplasmic
O34691	naiP	Putative niacin/nicotinamide transporter NaiP	Yes	CytoplasmicMembrane	12	0			@Multi-transmembrane	Membrane	GO:0016021|IPR005829|IPR011701|PS00217|PF07690
O07523	yhaP	Uncharacterized protein YhaP	Yes	CytoplasmicMembrane	7	0			@Multi-transmembrane	Membrane
P38494	ypfD	30S ribosomal protein S1 homolog		Cytoplasmic	0	0			@Intracellular	Cytoplasmic
Q06754	yacL	Uncharacterized PIN and TRAM-domain containing protein YacL (Putative RNase YacL) (EC 3.1.-.-)	Yes	CytoplasmicMembrane	4	0			@Multi-transmembrane	Membrane
O32220	copA	Copper-exporting P-type ATPase A (Protein CopA) (EC 3.6.3.54) (Cu(+)-exporting ATPase)	Yes	CytoplasmicMembrane	8	0			@Multi-transmembrane	Membrane	GO:0016021|IPR001757|IPR027256|TIGR01494|PR00119|TIGR01525
P13242	pyrG	CTP synthase (EC 6.3.4.2) (CTP synthetase) (UTP--ammonia ligase)		Cytoplasmic	0	Y			@Intracellular	Cytoplasmic
O31638	yjcP	Uncharacterized protein YjcP	Yes	Unknown	2	0			@Multi-transmembrane	Membrane
P31105	cheR	Chemotaxis protein methyltransferase (EC 2.1.1.80)		Cytoplasmic	0	0			@Intracellular	Cytoplasmic
O07608	lplJ	Lipoate-protein ligase LplJ (EC 2.7.7.63) (Lipoate--protein ligase)		Cytoplasmic	0	0			@Intracellular	Cytoplasmic
O34889	sdpA	Sporulation-delaying protein SdpA	Yes	Cytoplasmic	0	Y			@Intracellular	Cytoplasmic	IPR023902|PD034336
P54159	ypbR	Uncharacterized protein YpbR	Yes	CytoplasmicMembrane	0	0			@Intracellular	Cytoplasmic
P46322	pgsA	CDP-diacylglycerol--glycerol-3-phosphate 3-phosphatidyltransferase (EC 2.7.8.5) (Phosphatidylglycerophosphate synthase) (PGP synthase)	Yes	CytoplasmicMembrane	5	0			@Multi-transmembrane	Membrane	GO:0016021|GO:0016020|IPR004570|IPR000462|TIGR00560|PF01066|PS00379|PIRSF000847
Q01466	mreC	Cell shape-determining protein MreC (Cell shape protein MreC) (Rod shape-determining protein MreC)	Yes	Cytoplasmic	0	Y			@N-terminally anchored (No CS)	Membrane
P46911	qcrA	Menaquinol-cytochrome c reductase iron-sulfur subunit (Rieske iron-sulfur protein)	Yes	CytoplasmicMembrane	1	0			@N-terminally anchored (No CS)	Membrane	GO:0042651|IPR014909|PF08802
O34521	nagP	PTS system N-acetylglucosamine-specific EIICB component (EIICB-Nag) [Includes: N-acetylglucosamine permease IIC component (PTS system N-acetylglucosamine-specific EIIC component); N-acetylglucosamine-specific phosphotransferase enzyme IIB component (EC 2.7.1.69) (PTS system N-acetylglucosamine-specific EIIB component)]	Yes	CytoplasmicMembrane	10	0			@Multi-transmembrane	Membrane	GO:0016021|GO:0019866|GO:0016020|IPR010974|IPR003352|TIGR01998|PF02378
P80239	ahpC	Alkyl hydroperoxide reductase subunit C (EC 1.11.1.15) (Alkyl hydroperoxide reductase protein C22) (General stress protein 22) (Peroxiredoxin) (Thioredoxin peroxidase)		Cytoplasmic	0	0			@Intracellular	Cytoplasmic
P53557	bioB	Biotin synthase (EC 2.8.1.6)		Cytoplasmic	0	0			@Intracellular	Cytoplasmic
P71002	rapF	Response regulator aspartate phosphatase F (EC 3.1.-.-)		Cytoplasmic	0	0			@Intracellular	Cytoplasmic
O34633	yjlC	Uncharacterized protein YjlC		Unknown	0	0			@Intracellular	Cytoplasmic
P46912	qcrB	Menaquinol-cytochrome c reductase cytochrome b subunit	Yes	CytoplasmicMembrane	4	0			@Multi-transmembrane	Membrane	GO:0016020|GO:0016021|IPR005797|IPR023530|IPR016174|PS51002|PIRSF000032|PF13631|SSF81342
P25993	pyrAA	Carbamoyl-phosphate synthase pyrimidine-specific small chain (EC 6.3.5.5) (Carbamoyl-phosphate synthetase glutamine chain)		Cytoplasmic	0	0			@Intracellular	Cytoplasmic
P37477	lysS	Lysine--tRNA ligase (EC 6.1.1.6) (Lysyl-tRNA synthetase) (LysRS)		Cytoplasmic	0	0			@Intracellular	Cytoplasmic
P23129	odhA	2-oxoglutarate dehydrogenase E1 component (EC 1.2.4.2) (Alpha-ketoglutarate dehydrogenase)		Cytoplasmic	0	0			@Intracellular	Cytoplasmic
Q45068	alsT	Amino-acid carrier protein AlsT	Yes	CytoplasmicMembrane	11	0			@Multi-transmembrane	Membrane	GO:0016020|IPR001463|PR00175|PF01235|PTHR30330|PS00873|TIGR00835
P35162	resC	Cytochrome c biogenesis protein ResC	Yes	CytoplasmicMembrane	10	0			@Multi-transmembrane	Membrane
O31664	mtnU	Hydrolase MtnU (EC 3.5.-.-)		Cytoplasmic	0	0			@Intracellular	Cytoplasmic
P24073	fliY	Flagellar motor switch phosphatase FliY (EC 3.-.-.-) (CheY-P phosphatase FliY) (Flagellar motor switch protein FliY)	Yes	CytoplasmicMembrane	0	0			@Intracellular	Cytoplasmic	GO:0016020|IPR012826|TIGR02480
Q01464	minD	Septum site-determining protein MinD (Cell division inhibitor MinD)	Yes	CytoplasmicMembrane	0	0			@Intracellular	Cytoplasmic
O31974	yomK	SPBc2 prophage-derived uncharacterized protein YomK	Yes	CytoplasmicMembrane	2	0			@Multi-transmembrane	Membrane
Q06750	cysE	Serine acetyltransferase (SAT) (EC 2.3.1.30)		Cytoplasmic	0	0			@Intracellular	Cytoplasmic
P54465	yqeZ	Uncharacterized protein YqeZ	Yes	CytoplasmicMembrane	5	Y			@Multi-transmembrane	Membrane	GO:0016021|IPR002825|PF01972
P42953	tagG	Teichoic acid translocation permease protein TagG	Yes	CytoplasmicMembrane	6	0			@Multi-transmembrane	Membrane	GO:0016020|IPR000412|IPR013525|PS51012|PF01061
P80859	gndA	6-phosphogluconate dehydrogenase, NADP(+)-dependent, decarboxylating (EC 1.1.1.44) (GNTZII)		Cytoplasmic	0	0			@Intracellular	Cytoplasmic
O32082	yubF	Uncharacterized membrane protein YubF	Yes	CytoplasmicMembrane	2	0			@Multi-transmembrane	Membrane
O32154	yurM	Probable ABC transporter permease protein YurM	Yes	CytoplasmicMembrane	6	0			@Multi-transmembrane	Membrane	GO:0016020|IPR000515|G3DSA:1.10.3720.10|SSF161098|PS50928|PF00528
P39456	tcyC	L-cystine import ATP-binding protein TcyC (EC 3.6.3.-)	Yes	CytoplasmicMembrane	0	0			@Intracellular	Cytoplasmic
P39766	pyrP	Uracil permease (Uracil transporter)	Yes	CytoplasmicMembrane	12	0			@Multi-transmembrane	Membrane	GO:0016020|GO:0016021|IPR006043|IPR006042|IPR029935|PF00860|PS01116|PTHR11119|TIGR00801|PTHR11119:SF27
Q03224	glpX	Fructose-1,6-bisphosphatase class 2 (FBPase class 2) (EC 3.1.3.11) (D-fructose-1,6-bisphosphate 1-phosphohydrolase class 2)		Cytoplasmic	0	0			@Intracellular	Cytoplasmic
P94520	ysdB	Sigma-w pathway protein YsdB	Yes	CytoplasmicMembrane	1	0			@N-terminally anchored (No CS)	Membrane
P37877	ackA	Acetate kinase (EC 2.7.2.1) (Acetokinase)		Cytoplasmic	0	0			@Intracellular	Cytoplasmic
O31760	rnjB	Ribonuclease J 2 (RNase J2) (EC 3.1.-.-)		Cytoplasmic	0	0			@Intracellular	Cytoplasmic
P39802	cheW	Chemotaxis protein CheW (Coupling protein CheW)		Cytoplasmic	0	0			@Intracellular	Cytoplasmic
P70970	ecfAB	Energy-coupling factor transporter ATP-binding protein EcfA2 (ECF transporter A component EcfA2) (EC 3.6.3.-) (ECF transporter A component EcfA')	Yes	CytoplasmicMembrane	0	0			@Intracellular	Cytoplasmic	GO:0016020|IPR015856|PS51246
O32168	metP	Methionine import system permease protein MetP	Yes	CytoplasmicMembrane	5	0			@Multi-transmembrane	Membrane	GO:0016020|IPR000515|SSF161098|G3DSA:1.10.3720.10|PS50928|PF00528
P37487	ppaC	Manganese-dependent inorganic pyrophosphatase (EC 3.6.1.1) (Pyrophosphate phospho-hydrolase) (PPase)		Cytoplasmic	0	0			@Intracellular	Cytoplasmic
P54396	ypmB	Uncharacterized protein YpmB	Yes	CytoplasmicMembrane	0	Y			@N-terminally anchored (with CS)	Membrane
P31104	aroF	Chorismate synthase (EC 4.2.3.5) (5-enolpyruvylshikimate-3-phosphate phospholyase) (Vegetative protein 216) (VEG216)		Cytoplasmic	0	0			@Intracellular	Cytoplasmic
O34866	yodJ	Putative carboxypeptidase YodJ (EC 3.4.-.-)	Yes	CytoplasmicMembrane	0	Y		Yes	@Lipid anchored	Extracellular	PS51257
O32023	yqzC	Uncharacterized protein YqzC	Yes	Unknown	0	Y			@N-terminally anchored (with CS)	Membrane
O35004	ydjH	UPF0603 protein YdjH	Yes	CytoplasmicMembrane	1	Y			@Multi-transmembrane	Membrane
O34788	bdhA	(R,R)-butanediol dehydrogenase (EC 1.1.1.4) (Acetoin reductase/2,3-butanediol dehydrogenase) (AR/BDH)		Cytoplasmic	0	0			@Intracellular	Cytoplasmic
Q07836	wapI	Immunity protein WapI		Unknown	0	0			@Intracellular	Cytoplasmic
O34384	yceE	Uncharacterized protein YceE		Cytoplasmic	0	0			@Intracellular	Cytoplasmic
O32086	yubA	UPF0118 membrane protein YubA	Yes	CytoplasmicMembrane	8	0			@Multi-transmembrane	Membrane
Q45585	sigW	ECF RNA polymerase sigma factor SigW (ECF sigma factor SigW) (Alternative RNA polymerase sigma factor SigW) (RNA polymerase sigma-W factor) (Sigma-W factor)		Cytoplasmic	0	0			@Intracellular	Cytoplasmic
P23453	fliM	Flagellar motor switch protein FliM	Yes	CytoplasmicMembrane	0	0			@Intracellular	Cytoplasmic
P54419	metK	S-adenosylmethionine synthase (AdoMet synthase) (EC 2.5.1.6) (MAT) (Methionine adenosyltransferase)		Cytoplasmic	0	0			@Intracellular	Cytoplasmic
C0H3X7	mprF	Phosphatidylglycerol lysyltransferase (EC 2.3.2.3) (Lysylphosphatidylglycerol synthase) (LPG synthase)	Yes	CytoplasmicMembrane	15	0			@Multi-transmembrane	Membrane
P02394	rplL	50S ribosomal protein L7/L12 (BL9) (Vegetative protein 341) (VEG341)		Cytoplasmic	0	0			@Intracellular	Cytoplasmic
P54420	asnB	Asparagine synthetase [glutamine-hydrolyzing] 1 (EC 6.3.5.4)		Cytoplasmic	0	0			@Intracellular	Cytoplasmic
O07584	plsC	1-acyl-sn-glycerol-3-phosphate acyltransferase (1-AGP acyltransferase) (1-AGPAT) (1-acyl-G3P acyltransferase) (EC 2.3.1.n4) (Lysophosphatidic acid acyltransferase) (LPAAT) (Phosphatidic acid synthase) (PA synthase)	Yes	Cytoplasmic	0	0			@Lipid anchored	Extracellular	GO:0016020|IPR004552|TIGR00530
O34981	dapH	2,3,4,5-tetrahydropyridine-2,6-dicarboxylate N-acetyltransferase (EC 2.3.1.89) (Tetrahydrodipicolinate N-acetyltransferase) (THP acetyltransferase) (Tetrahydropicolinate acetylase)		Cytoplasmic	0	0			@Intracellular	Cytoplasmic
P46913	qcrC	Menaquinol-cytochrome c reductase cytochrome b/c subunit	Yes	CytoplasmicMembrane	3	0			@Multi-transmembrane	Membrane	GO:0016020|GO:0016021|IPR005798|IPR012049|PF00032|PIRSF036636|SSF81648|PS51003
O05248	yugP	Putative membrane protease YugP (EC 3.4.24.-)	Yes	CytoplasmicMembrane	3	Y			@Multi-transmembrane	Membrane
P96650	yddM	Uncharacterized protein YddM	Yes	Unknown	2	0			@Multi-transmembrane	Membrane
O32155	yurN	Probable ABC transporter permease protein YurN	Yes	CytoplasmicMembrane	6	0			@Multi-transmembrane	Membrane	GO:0016020|IPR000515|PS50928|PF00528|G3DSA:1.10.3720.10|SSF161098
P45914	yqaR	Uncharacterized protein YqaR	Yes	Unknown	1	0			@N-terminally anchored (No CS)	Membrane
P81100	yceC	Stress response protein SCP2		Cytoplasmic	0	0			@Intracellular	Cytoplasmic
O32233	secG	Probable protein-export membrane protein SecG	Yes	CytoplasmicMembrane	1	Y			@Multi-transmembrane	Membrane	GO:0016021|IPR004692|PF03840|PR01651|TIGR00810
P24012	ctaE	Cytochrome c oxidase subunit 3 (EC 1.9.3.1) (Caa-3605 subunit 3) (Cytochrome aa3 subunit 3) (Cytochrome c oxidase polypeptide III) (Oxidase aa(3) subunit 3)	Yes	CytoplasmicMembrane	5	0	1		@Multi-transmembrane	Membrane	GO:0016020|IPR000298|IPR013833|IPR024791|PS50253|SSF81452|PF00510|G3DSA:1.20.120.80|PTHR11403
O34996	polA	DNA polymerase I (POL I) (EC 2.7.7.7)		Cytoplasmic	0	0			@Intracellular	Cytoplasmic
P25972	pyrE	Orotate phosphoribosyltransferase (OPRT) (OPRTase) (EC 2.4.2.10)		Cytoplasmic	0	0			@Intracellular	Cytoplasmic
P37541	yaaT	Stage 0 sporulation protein YaaT		Cytoplasmic	0	0			@Intracellular	Cytoplasmic
P40924	pgk	Phosphoglycerate kinase (EC 2.7.2.3)		Cytoplasmic	0	0			@Intracellular	Cytoplasmic
P70974	rplM	50S ribosomal protein L13	Yes	CytoplasmicMembrane	0	0			@Intracellular	Cytoplasmic
O31778	miaB	(Dimethylallyl)adenosine tRNA methylthiotransferase MiaB (EC 2.-.-.-) (tRNA-i(6)A37 methylthiotransferase)		Cytoplasmic	0	0			@Intracellular	Cytoplasmic
P37252	ilvH	Acetolactate synthase small subunit (EC 2.2.1.6) (Acetohydroxy-acid synthase small subunit) (AHAS) (ALS)		Unknown	0	0			@Intracellular	Cytoplasmic
O34805	yvrC	Uncharacterized ABC transporter substrate-binding lipoprotein YvrC	Yes	CytoplasmicMembrane	0	Y		Yes	@Lipid anchored	Extracellular	PS51257
O54408	relA	GTP pyrophosphokinase (EC 2.7.6.5) ((p)ppGpp synthase) (ATP:GTP 3'-pyrophosphotransferase) (ppGpp synthase I)		Cytoplasmic	0	0			@Intracellular	Cytoplasmic
O34628	yvlB	Uncharacterized protein YvlB		Cytoplasmic	0	0			@Intracellular	Cytoplasmic
P96604	ydbI	UPF0118 membrane protein YdbI	Yes	CytoplasmicMembrane	7	0			@Multi-transmembrane	Membrane
P54953	yxeN	Probable amino-acid permease protein YxeN	Yes	CytoplasmicMembrane	3	0			@Multi-transmembrane	Membrane	GO:0016020|GO:0016021|IPR000515|IPR010065|PS50928|SSF161098|PF00528|TIGR01726|G3DSA:1.10.3720.10
P46899	rplR	50S ribosomal protein L18 (BL16)		Cytoplasmic	0	0			@Intracellular	Cytoplasmic
O32095	yueF	UPF0118 membrane protein YueF	Yes	CytoplasmicMembrane	8	0			@Multi-transmembrane	Membrane
O06477	yfmS	Putative sensory transducer protein YfmS (Methyl-accepting chemotaxis protein)	Yes	CytoplasmicMembrane	0	0			@Intracellular	Cytoplasmic	GO:0016020|IPR004089|PS50111|PF00015|SM00283
P42924	rplW	50S ribosomal protein L23		Cytoplasmic	0	0			@Intracellular	Cytoplasmic
P45694	tkt	Transketolase (TK) (EC 2.2.1.1)		Unknown	0	0			@Intracellular	Cytoplasmic
P37599	cheV	Chemotaxis protein CheV		Cytoplasmic	0	0			@Intracellular	Cytoplasmic
P39760	ktrC	Ktr system potassium uptake protein C (K(+)-uptake protein KtrC) (ORF4)		Cytoplasmic	0	0			@Intracellular	Cytoplasmic
O07556	yhjB	Uncharacterized symporter YhjB	Yes	CytoplasmicMembrane	13	0			@Multi-transmembrane	Membrane	GO:0016020|IPR001734|PTHR11819|PS50283|PF00474
P37513	yyaK	Uncharacterized protein YyaK	Yes	CytoplasmicMembrane	8	0			@Multi-transmembrane	Membrane	GO:0016020|IPR003675|PF02517
P37944	aroK	Shikimate kinase (SK) (EC 2.7.1.71)		Cytoplasmic	0	0			@Intracellular	Cytoplasmic
P94420	yclP	Uncharacterized ABC transporter ATP-binding protein YclP	Yes	CytoplasmicMembrane	0	0			@Intracellular	Cytoplasmic
P39779	codY	GTP-sensing transcriptional pleiotropic repressor CodY (Vegetative protein 286B) (VEG286B)		Cytoplasmic	0	0			@Intracellular	Cytoplasmic
Q06796	rplK	50S ribosomal protein L11 (BL11)		Cytoplasmic	0	0			@Intracellular	Cytoplasmic
P54482	ispG	4-hydroxy-3-methylbut-2-en-1-yl diphosphate synthase (EC 1.17.7.1) (1-hydroxy-2-methyl-2-(E)-butenyl 4-diphosphate synthase)		Cytoplasmic	0	0			@Intracellular	Cytoplasmic
O32000	yokG	SPBc2 prophage-derived pesticidal crystal protein-like YokG		Unknown	0	0			@Intracellular	Cytoplasmic
O34847	accA	Acetyl-coenzyme A carboxylase carboxyl transferase subunit alpha (ACCase subunit alpha) (Acetyl-CoA carboxylase carboxyltransferase subunit alpha) (EC 6.4.1.2)		Cytoplasmic	0	0			@Intracellular	Cytoplasmic
P39773	gpmI	2,3-bisphosphoglycerate-independent phosphoglycerate mutase (BPG-independent PGAM) (Phosphoglyceromutase) (iPGM) (EC 5.4.2.12) (Vegetative protein 107) (VEG107)		Cytoplasmic	0	0			@Intracellular	Cytoplasmic
O32162	sufB	FeS cluster assembly protein SufB		Cytoplasmic	0	0			@Intracellular	Cytoplasmic
O32239	yvaQ	Putative sensory transducer protein YvaQ (Methyl-accepting chemotaxis protein)	Yes	CytoplasmicMembrane	1	Y			@Multi-transmembrane	Membrane	GO:0016021|GO:0016020|IPR003660|IPR004089|IPR004090|PF00672|PF00015|PR00260|SM00304|PS50111|PS50885|SM00283
O31929	yopI	SPBc2 prophage-derived uncharacterized protein YopI	Yes	Cytoplasmic	1	0			@N-terminally anchored (No CS)	Membrane
O05254	yufP	Uncharacterized ABC transporter permease protein YufP	Yes	CytoplasmicMembrane	8	0			@Multi-transmembrane	Membrane	GO:0016020|IPR001851|IPR002229|PF02653|PR00342
P71009	albC	Putative ABC transporter ATP-binding protein AlbC (Antilisterial bacteriocin subtilosin biosynthesis protein AlbC)	Yes	CytoplasmicMembrane	0	0			@Intracellular	Cytoplasmic
P45740	thiC	Phosphomethylpyrimidine synthase (EC 4.1.99.17) (Hydroxymethylpyrimidine phosphate synthase) (HMP-P synthase) (HMP-phosphate synthase) (HMPP synthase) (Thiamine biosynthesis protein ThiC)		Cytoplasmic	0	0			@Intracellular	Cytoplasmic
P24137	oppF	Oligopeptide transport ATP-binding protein OppF (Stage 0 sporulation protein KE)	Yes	CytoplasmicMembrane	0	0			@Intracellular	Cytoplasmic
O31723	ylmA	Uncharacterized ABC transporter ATP-binding protein YlmA (EC 3.6.3.-)	Yes	CytoplasmicMembrane	0	0			@Intracellular	Cytoplasmic
P94392	ycgO	Uncharacterized symporter YcgO	Yes	CytoplasmicMembrane	12	0			@Multi-transmembrane	Membrane	GO:0016021|GO:0016020|IPR011851|IPR001734|IPR019900|IPR018212|TIGR02121|PTHR11819|TIGR00813|PF00474|PS00457|PS00456|PS50283
P13800	degU	Transcriptional regulatory protein DegU (Protease production enhancer protein)		Cytoplasmic	0	0			@Intracellular	Cytoplasmic
O31729	ylmG	Uncharacterized membrane protein YlmG	Yes	CytoplasmicMembrane	2	0			@Multi-transmembrane	Membrane	GO:0016020|IPR003425|PF02325
P80858	leuC	3-isopropylmalate dehydratase large subunit (EC 4.2.1.33) (Alpha-IPM isomerase) (IPMI) (Isopropylmalate isomerase) (Superoxide-inducible protein 10) (SOI10)		Cytoplasmic	0	0			@Intracellular	Cytoplasmic
P42182	era	GTPase Era (Bex protein)	Yes	CytoplasmicMembrane	0	0			@Intracellular	Cytoplasmic
P50863	salA	Protein mrp homolog SalA	Yes	CytoplasmicMembrane	0	0			@Intracellular	Cytoplasmic
P21469	rpsG	30S ribosomal protein S7 (BS7)		Cytoplasmic	0	0			@Intracellular	Cytoplasmic
O34979	yvrO	Uncharacterized ABC transporter ATP-binding protein YvrO (EC 3.6.3.-)	Yes	CytoplasmicMembrane	0	0			@Intracellular	Cytoplasmic
Q45493	rnjA	Ribonuclease J 1 (RNase J1) (EC 3.1.-.-)		Cytoplasmic	0	0			@Intracellular	Cytoplasmic
P71070	yukC	Uncharacterized protein YukC	Yes	CytoplasmicMembrane	1	0			@Intracellular /TMH start AFTER 60	Cytoplasmic
O32002	yokE	SPBc2 prophage-derived uncharacterized protein YokE		Cytoplasmic	0	0			@Intracellular	Cytoplasmic
O34641	ytrB	ABC transporter ATP-binding protein YtrB	Yes	CytoplasmicMembrane	0	0			@Intracellular	Cytoplasmic
O06965	yvcA	Putative lipoprotein YvcA	Yes	Unknown	0	Y		Yes	@Lipid anchored	Extracellular	PS51257
P26908	rplU	50S ribosomal protein L21 (BL20)		Unknown	0	0			@Intracellular	Cytoplasmic
P37811	atpH	ATP synthase subunit delta (ATP synthase F(1) sector subunit delta) (F-type ATPase subunit delta) (F-ATPase subunit delta)	Yes	Cytoplasmic	0	0			@Intracellular	Cytoplasmic	GO:0016020|IPR020781|PS00389
P39821	proA	Gamma-glutamyl phosphate reductase (GPR) (EC 1.2.1.41) (Glutamate-5-semialdehyde dehydrogenase) (Glutamyl-gamma-semialdehyde dehydrogenase) (GSA dehydrogenase)		Cytoplasmic	0	0			@Intracellular	Cytoplasmic
O34526	alaS	Alanine--tRNA ligase (EC 6.1.1.7) (Alanyl-tRNA synthetase) (AlaRS)		Cytoplasmic	0	0			@Intracellular	Cytoplasmic
Q45589	ybbP	Uncharacterized protein YbbP	Yes	CytoplasmicMembrane	3	0			@Multi-transmembrane	Membrane
O31773	pbpX	Putative penicillin-binding protein PbpX	Yes	CytoplasmicMembrane	1	0			@N-terminally anchored (No CS)	Membrane
P46919	gpsA	Glycerol-3-phosphate dehydrogenase [NAD(P)+] (EC 1.1.1.94) (NAD(P)H-dependent dihydroxyacetone-phosphate reductase) (NAD(P)H-dependent glycerol-3-phosphate dehydrogenase)	Yes	Unknown	0	Y			@N-terminally anchored (No CS)	Membrane
O31712	yknZ	Uncharacterized ABC transporter permease YknZ	Yes	CytoplasmicMembrane	4	0			@Multi-transmembrane	Membrane	GO:0016020|IPR003838|PF02687
P42954	tagH	Teichoic acids export ATP-binding protein TagH (EC 3.6.3.40) (Teichoic acid-transporting ATPase)	Yes	CytoplasmicMembrane	1	0			@Intracellular /TMH start AFTER 60	Cytoplasmic	GO:0005886|GO:0016020|IPR030284|IPR015860|PTHR24220:SF310|PS51251
P37518	ychF	Ribosome-binding ATPase YchF		Cytoplasmic	0	0			@Intracellular	Cytoplasmic
C0SPB0	ytcI	Uncharacterized acyl--CoA ligase YtcI (EC 6.2.1.-)		Cytoplasmic	0	0			@Intracellular	Cytoplasmic
O07516	yhaH	Uncharacterized membrane protein YhaH	Yes	Unknown	1	0			@N-terminally anchored (No CS)	Membrane
P35163	resD	Transcriptional regulatory protein ResD		Cytoplasmic	0	0			@Intracellular	Cytoplasmic
C0SPB4	yhaQ	Uncharacterized ABC transporter ATP-binding protein YhaQ	Yes	CytoplasmicMembrane	0	0			@Intracellular	Cytoplasmic
O34948	ykwC	Uncharacterized oxidoreductase YkwC (EC 1.1.-.-)		Cytoplasmic	0	Y			@Intracellular	Cytoplasmic
P54983	amhX	Amidohydrolase AmhX (EC 3.5.1.-) (Aminoacylase)		Cytoplasmic	0	0			@Intracellular	Cytoplasmic
O05255	yufQ	Uncharacterized ABC transporter permease protein YufQ	Yes	CytoplasmicMembrane	9	0			@Multi-transmembrane	Membrane	GO:0016020|IPR001851|PF02653
P96704	ydgF	Uncharacterized transporter YdgF	Yes	CytoplasmicMembrane	12	0			@Multi-transmembrane	Membrane	GO:0016020|GO:0016021|IPR002293|IPR004841|IPR004840|PIRSF006060|PTHR11785|PF00324|PS00218
P29141	vpr	Minor extracellular protease vpr (EC 3.4.21.-)	Yes	Extracellular	0	Y	1		@Secretory(released) (with CS)	Extracellular
O06491	gatA	Glutamyl-tRNA(Gln) amidotransferase subunit A (Glu-ADT subunit A) (EC 6.3.5.7)		Cytoplasmic	0	0			@Intracellular	Cytoplasmic
P21471	rpsJ	30S ribosomal protein S10 (BS13)		Cytoplasmic	0	0			@Intracellular	Cytoplasmic
Q08788	srfAD	Surfactin synthase thioesterase subunit (EC 3.1.2.-) (Cold shock protein CSI16)		Cytoplasmic	0	0			@Intracellular	Cytoplasmic
O31709	yknW	Uncharacterized protein YknW	Yes	CytoplasmicMembrane	5	0			@Multi-transmembrane	Membrane	GO:0016020|IPR006977|PF04893
P53001	aspB	Aspartate aminotransferase (AspAT) (EC 2.6.1.1) (Transaminase A)		Cytoplasmic	0	Y			@Secretory(released) (with CS)	Extracellular
P96667	ydeJ	Uncharacterized lipoprotein YdeJ	Yes	Unknown	0	Y		Yes	@Lipid anchored	Extracellular	PS51257
O34362	ykoD	Putative HMP/thiamine import ATP-binding protein YkoD (EC 3.6.3.-)	Yes	CytoplasmicMembrane	0	0			@Intracellular	Cytoplasmic
P12875	rplN	50S ribosomal protein L14		Cytoplasmic	0	0			@Intracellular	Cytoplasmic
P23452	fliL	Flagellar protein FliL	Yes	Unknown	1	0			@N-terminally anchored (No CS)	Membrane
P16655	divIB	Cell division protein DivIB (Cell division and sporulation protein) (Division initiation protein DivIB)	Yes	CytoplasmicMembrane	1	0			@N-terminally anchored (No CS)	Membrane
P35164	resE	Sensor histidine kinase ResE (EC 2.7.13.3)	Yes	CytoplasmicMembrane	2	0			@Multi-transmembrane	Membrane	GO:0016020|GO:0016021|IPR003661|IPR003660|SM00388|PF00672|SM00304|G3DSA:1.10.287.130|PS50885|PF00512
O34392	ytrE	ABC transporter ATP-binding protein YtrE	Yes	CytoplasmicMembrane	0	0			@Intracellular	Cytoplasmic
P45919	yqbC	Uncharacterized protein YqbC	Yes	Unknown	1	0			@N-terminally anchored (No CS)	Membrane
P20277	rplQ	50S ribosomal protein L17 (BL15) (BL21)		Cytoplasmic	0	0			@Intracellular	Cytoplasmic
C0SPA7	yukB	Ftsk domain-containing protein YukB	Yes	CytoplasmicMembrane	2	0			@Multi-transmembrane	Membrane	GO:0016021|IPR002543|PS50901|PF01580
Q45598	yydD	Uncharacterized protein YydD		Cytoplasmic	0	0			@Intracellular	Cytoplasmic
O07581	yhdL	Probable anti-sigma-M factor YhdL	Yes	Unknown	2	0			@Multi-transmembrane	Membrane
O07543	yheB	UPF0754 membrane protein YheB	Yes	CytoplasmicMembrane	2	0			@Multi-transmembrane	Membrane
P08064	sdhC	Succinate dehydrogenase cytochrome b558 subunit (Cytochrome b-558)	Yes	CytoplasmicMembrane	5	0			@Multi-transmembrane	Membrane	IPR000701|PF01127
O32039	hisS	Histidine--tRNA ligase (EC 6.1.1.21) (Histidyl-tRNA synthetase) (HisRS)		Cytoplasmic	0	0			@Intracellular	Cytoplasmic
P96616	ydbT	UPF0699 transmembrane protein YdbT	Yes	CytoplasmicMembrane	6	0			@Multi-transmembrane	Membrane
P17922	pheT	Phenylalanine--tRNA ligase beta subunit (EC 6.1.1.20) (Phenylalanyl-tRNA synthetase beta subunit) (PheRS)		Cytoplasmic	0	0			@Intracellular	Cytoplasmic
P39666	nadC	Probable nicotinate-nucleotide pyrophosphorylase [carboxylating] (EC 2.4.2.19) (General stress protein 70) (GSP70) (Quinolinate phosphoribosyltransferase [decarboxylating]) (QAPRTase)		Cytoplasmic	0	0			@Intracellular	Cytoplasmic
P54554	yqjQ	Uncharacterized oxidoreductase YqjQ (EC 1.-.-.-)		Cytoplasmic	0	0			@Intracellular	Cytoplasmic
O34659	ybbR	YbbR-like domain-containing protein YbbR	Yes	Unknown	0	Y			@N-terminally anchored (No CS)	Membrane
P05649	dnaN	DNA polymerase III subunit beta (EC 2.7.7.7)		Cytoplasmic	0	0			@Intracellular	Cytoplasmic
P40761	yuxK	Uncharacterized protein YuxK (ORF2)	Yes	CytoplasmicMembrane	0	0			@Intracellular	Cytoplasmic
P0CI74	gpsB	Cell cycle protein GpsB (Guiding PBP1-shuttling protein)		Cytoplasmic	0	0			@Intracellular	Cytoplasmic
O07521	yhaM	3'-5' exoribonuclease YhaM (EC 3.1.-.-)		Cytoplasmic	0	0			@Intracellular	Cytoplasmic
Q08311	cotY	Spore coat protein Y		Cytoplasmic	0	0			@Intracellular	Cytoplasmic
P55908	ycgA	Uncharacterized protein YcgA	Yes	CytoplasmicMembrane	11	0			@Multi-transmembrane	Membrane	GO:0016021|IPR018385|PF03606
O34989	yvrG	Sensor histidine kinase YvrG (EC 2.7.13.3)	Yes	CytoplasmicMembrane	2	0			@Multi-transmembrane	Membrane	GO:0016020|IPR003661|SM00388|G3DSA:1.10.287.130|PF00512
P52996	panB	3-methyl-2-oxobutanoate hydroxymethyltransferase (EC 2.1.2.11) (Ketopantoate hydroxymethyltransferase) (KPHMT)		Cytoplasmic	0	0			@Intracellular	Cytoplasmic
Q45592	yydJ	Probable peptide export permease protein YydJ	Yes	CytoplasmicMembrane	6	0			@Multi-transmembrane	Membrane
O34353	ydjN	Uncharacterized protein YdjN		Unknown	0	Y			@Secretory(released) (with CS)	Extracellular
P26904	dppC	Dipeptide transport system permease protein DppC	Yes	CytoplasmicMembrane	7	0			@Multi-transmembrane	Membrane	GO:0016020|IPR000515|SSF161098|G3DSA:1.10.3720.10|PS50928|PF00528
P37946	ilvA	L-threonine dehydratase biosynthetic IlvA (EC 4.3.1.19) (Threonine deaminase)		Cytoplasmic	0	0			@Intracellular	Cytoplasmic
O32045	yrvD	Uncharacterized protein YrvD	Yes	CytoplasmicMembrane	2	0			@Multi-transmembrane	Membrane
O32022	yqzD	Uncharacterized protein YqzD	Yes	Cytoplasmic	0	Y			@N-terminally anchored (No CS)	Membrane
O31636	yjcN	Uncharacterized protein YjcN	Yes	Unknown	0	Y			@N-terminally anchored (with CS)	Membrane
O34341	yebC	Uncharacterized protein YebC	Yes	CytoplasmicMembrane	5	0			@Multi-transmembrane	Membrane	PD113106
P12040	purN	Phosphoribosylglycinamide formyltransferase (EC 2.1.2.2) (5'-phosphoribosylglycinamide transformylase) (GAR transformylase) (GART)		Cytoplasmic	0	0			@Intracellular	Cytoplasmic
O06725	yisL	UPF0344 protein YisL	Yes	CytoplasmicMembrane	4	0			@Multi-transmembrane	Membrane	IPR010899|PD067392
P35536	fliZ	Flagellar biosynthetic protein FliZ	Yes	CytoplasmicMembrane	1	Y			@Multi-transmembrane	Membrane	GO:0016021|IPR022781|PF04347
P54467	yqfB	Uncharacterized protein YqfB	Yes	CytoplasmicMembrane	1	0			@N-terminally anchored (No CS)	Membrane
O34474	yoeA	Probable multidrug resistance protein YoeA	Yes	CytoplasmicMembrane	12	0			@Multi-transmembrane	Membrane	GO:0016020|IPR002528|PF01554|TIGR00797
O32107	yuiD	Uncharacterized membrane protein YuiD	Yes	CytoplasmicMembrane	1	Y			@Multi-transmembrane	Membrane
P39911	yphF	Uncharacterized protein YphF (ORF1)	Yes	CytoplasmicMembrane	0	Y			@Lipid anchored	Extracellular	PS51257
P24010	ctaD	Cytochrome c oxidase subunit 1 (EC 1.9.3.1) (Caa-3605 subunit 1) (Cytochrome aa3 subunit 1) (Cytochrome c oxidase polypeptide I) (Oxidase aa(3) subunit 1)	Yes	CytoplasmicMembrane	14	0			@Multi-transmembrane	Membrane	GO:0005886|GO:0016021|IPR014241|IPR000883|TIGR02891|PTHR10422|PF00115|PR01165
O34897	ykuT	Uncharacterized MscS family protein YkuT	Yes	CytoplasmicMembrane	3	0			@Multi-transmembrane	Membrane	GO:0016020|IPR006685|IPR011066|IPR011014|PF00924|SSF82689|SSF82861
P94512	ysaA	Putative uncharacterized hydrolase YsaA (EC 3.-.-.-)		Unknown	0	0			@Intracellular	Cytoplasmic
O32101	yueB	Bacteriophage SPP1 adsorption protein YueB (Bacteriophage SPP1 receptor protein YueB)	Yes	CytoplasmicMembrane	6	0			@Multi-transmembrane	Membrane	GO:0016021|IPR023838|TIGR03929
Q04795	dapG	Aspartokinase 1 (EC 2.7.2.4) (Aspartate kinase 1) (Aspartokinase I)		Cytoplasmic	0	0			@Intracellular	Cytoplasmic
Q45514	sapB	Protein SapB	Yes	CytoplasmicMembrane	5	0			@Multi-transmembrane	Membrane	GO:0016020|IPR003416|PF02308|PR01837
Q797A7	yfnA	Uncharacterized amino acid permease YfnA	Yes	CytoplasmicMembrane	12	0			@Multi-transmembrane	Membrane	GO:0016020|IPR002293|PF13520|PTHR11785|PIRSF006060
P40768	ytkA	Uncharacterized protein YtkA (PSPA8)	Yes	Unknown	0	Y		Yes	@Secretory(released) (with CS)	Extracellular
P54485	yqgB	Uncharacterized protein YqgB	Yes	CytoplasmicMembrane	4	0			@Multi-transmembrane	Membrane
P39765	pyrR	Bifunctional protein PyrR [Includes: Pyrimidine operon regulatory protein; Uracil phosphoribosyltransferase (UPRTase) (EC 2.4.2.9)]		Cytoplasmic	0	0			@Intracellular	Cytoplasmic
O32105	yuiF	Putative amino acid transporter YuiF	Yes	CytoplasmicMembrane	11	0			@Multi-transmembrane	Membrane	GO:0016021|IPR018461|PF03553
P54954	yxeO	Probable amino-acid import ATP-binding protein YxeO (EC 3.6.3.-)	Yes	CytoplasmicMembrane	0	0			@Intracellular	Cytoplasmic
O31451	ybfJ	Uncharacterized protein YbfJ	Yes	Unknown	0	Y		Yes	@N-terminally anchored (No CS)	Membrane
O35007	yvrP	Putative efflux system protein YvrP	Yes	Unknown	1	0			@N-terminally anchored (No CS)	Membrane
O31666	mtnW	2,3-diketo-5-methylthiopentyl-1-phosphate enolase (DK-MTP-1-P enolase) (EC 5.3.2.5) (RuBisCO-like protein) (RLP)		Cytoplasmic	0	0			@Intracellular	Cytoplasmic
O31581	yfhM	AB hydrolase superfamily protein YfhM (EC 3.-.-.-)		Cytoplasmic	0	0			@Intracellular	Cytoplasmic
Q45612	yycI	Two-component system YycFG regulatory protein	Yes	Unknown	1	0			@N-terminally anchored (No CS)	Membrane	GO:0016021|IPR018604|PF09648
P40806	pksJ	Polyketide synthase PksJ (PKS)		Unknown	0	0			@Intracellular	Cytoplasmic
P54593	yhcI	Uncharacterized protein YhcI	Yes	CytoplasmicMembrane	6	0			@Multi-transmembrane	Membrane
P54571	mleN	Malate-2H(+)/Na(+)-lactate antiporter	Yes	CytoplasmicMembrane	11	0			@Multi-transmembrane	Membrane	GO:0016021|IPR018461|IPR004770|PF03553|TIGR00931
P00497	purF	Amidophosphoribosyltransferase (ATase) (EC 2.4.2.14) (Glutamine phosphoribosylpyrophosphate amidotransferase) (GPATase)		Cytoplasmic	0	0			@Intracellular	Cytoplasmic
P04990	thrC	Threonine synthase (TS) (EC 4.2.3.1)		Cytoplasmic	0	0			@Intracellular	Cytoplasmic
O32245	yvbH	Uncharacterized protein YvbH		Cytoplasmic	0	0			@Intracellular	Cytoplasmic
P42400	yckB	Probable ABC transporter extracellular-binding protein YckB (ORF2)	Yes	Unknown	0	Y		Yes	@Lipid anchored	Extracellular	PS51257
P39804	ipi	Intracellular proteinase inhibitor (BsuPI)		Cytoplasmic	0	0			@Intracellular	Cytoplasmic
O31755	proS	Proline--tRNA ligase (EC 6.1.1.15) (Prolyl-tRNA synthetase) (ProRS)		Cytoplasmic	0	0			@Intracellular	Cytoplasmic
O34768	ydjE	Uncharacterized sugar kinase YdjE (EC 2.7.1.-)		Cytoplasmic	0	0			@Intracellular	Cytoplasmic
P17903	rsbV	Anti-sigma-B factor antagonist (Anti-anti-sigma-B factor)		Cytoplasmic	0	0			@Intracellular	Cytoplasmic
P96612	ddl	D-alanine--D-alanine ligase (EC 6.3.2.4) (D-Ala-D-Ala ligase) (D-alanylalanine synthetase)		Cytoplasmic	0	0			@Intracellular	Cytoplasmic
P39810	flgK	Flagellar hook-associated protein 1 (HAP1)		Unknown	0	0			@Intracellular	Cytoplasmic
P54452	yqeG	Uncharacterized protein YqeG		Unknown	0	0			@Intracellular	Cytoplasmic
P94585	mscL	Large-conductance mechanosensitive channel	Yes	CytoplasmicMembrane	3	0			@Multi-transmembrane	Membrane	GO:0016021|IPR001185|TIGR00220|SSF81330|PR01264|PF01741|MF_00115
O34594	cccB	Cytochrome c-551 (Cytochrome c B) (Cytochrome c551)	Yes	CytoplasmicMembrane	0	Y		Yes	@Lipid anchored	Extracellular	GO:0016021|IPR012218|PIRSF000025|PS51257
P14802	yoxD	Uncharacterized oxidoreductase YoxD (EC 1.-.-.-)		Cytoplasmic	0	0			@Intracellular	Cytoplasmic
P80864	tpx	Probable thiol peroxidase (EC 1.11.1.-) (Superoxide-inducible protein 8) (SOI8)		Cytoplasmic	0	0			@Intracellular	Cytoplasmic
P80865	sucD	Succinyl-CoA ligase [ADP-forming] subunit alpha (EC 6.2.1.5) (Succinyl-CoA synthetase subunit alpha) (SCS-alpha) (Vegetative protein 239) (VEG239)		Cytoplasmic	0	0			@Intracellular	Cytoplasmic
P26497	spo0J	Stage 0 sporulation protein J		Cytoplasmic	0	0			@Intracellular	Cytoplasmic
P12041	purQ	Phosphoribosylformylglycinamidine synthase 1 (EC 6.3.5.3) (Phosphoribosylformylglycinamidine synthase I) (FGAM synthase I)		Cytoplasmic	0	0			@Intracellular	Cytoplasmic
P06628	spo0F	Sporulation initiation phosphotransferase F (EC 2.7.-.-) (Stage 0 sporulation protein F)		Cytoplasmic	0	0			@Intracellular	Cytoplasmic
O31615	yjbQ	Putative Na(+)/H(+) antiporter YjbQ	Yes	CytoplasmicMembrane	13	0			@Multi-transmembrane	Membrane	GO:0016021|IPR006153|PF00999
P54423	wprA	Cell wall-associated protease (EC 3.4.21.-) [Cleaved into: Cell wall-associated polypeptide CWBP23 (CWBP23); Cell wall-associated polypeptide CWBP52 (CWBP52)]		Cellwall	0	Y			@Secretory(released) (with CS)	Extracellular
P37570	yacI	Putative ATP:guanido phosphotransferase YacI (EC 2.7.3.-)		Cytoplasmic	0	0			@Intracellular	Cytoplasmic
P21881	pdhA	Pyruvate dehydrogenase E1 component subunit alpha (EC 1.2.4.1) (S complex, 42 kDa subunit) (Vegetative protein 220) (VEG220)		Cytoplasmic	0	0			@Intracellular	Cytoplasmic
P23630	lysA	Diaminopimelate decarboxylase (DAP decarboxylase) (DAPDC) (EC 4.1.1.20)		Cytoplasmic	0	0			@Intracellular	Cytoplasmic
P18579	murB	UDP-N-acetylenolpyruvoylglucosamine reductase (EC 1.3.1.98) (UDP-N-acetylmuramate dehydrogenase)		Cytoplasmic	0	0			@Intracellular	Cytoplasmic
P96647	yddJ	Uncharacterized protein YddJ	Yes	Unknown	0	Y		Yes	@Lipid anchored	Extracellular	PS51257
P05652	gyrB	DNA gyrase subunit B (EC 5.99.1.3)		Cytoplasmic	0	0			@Intracellular	Cytoplasmic
O31675	queC	7-cyano-7-deazaguanine synthase (EC 6.3.4.20) (7-cyano-7-carbaguanine synthase) (PreQ(0) synthase) (Queuosine biosynthesis protein QueC)		Cytoplasmic	0	0			@Intracellular	Cytoplasmic
P96615	ydbS	UPF0699 transmembrane protein YdbS	Yes	CytoplasmicMembrane	2	0			@Multi-transmembrane	Membrane
P37538	yaaQ	Uncharacterized protein YaaQ	Yes	CytoplasmicMembrane	0	0			@Intracellular	Cytoplasmic
O31619	thiF	Sulfur carrier protein ThiS adenylyltransferase (EC 2.7.7.73)		Cytoplasmic	0	0			@Intracellular	Cytoplasmic
P71079	fabL	Enoyl-[acyl-carrier-protein] reductase [NADPH] FabL (ENR) (EC 1.3.1.104) (Enoyl-acyl carrier protein reductase III) (NADPH-dependent enoyl-ACP reductase)		Cytoplasmic	0	0			@Intracellular	Cytoplasmic
P23715	argC	N-acetyl-gamma-glutamyl-phosphate reductase (AGPR) (EC 1.2.1.38) (N-acetyl-glutamate semialdehyde dehydrogenase) (NAGSA dehydrogenase)		Cytoplasmic	0	0			@Intracellular	Cytoplasmic
P23454	ylxF	FlaA locus 22.9 kDa protein (ORF 6)	Yes	Unknown	1	0			@Secretory(released) (with CS)	Extracellular
O31743	rbgA	Ribosome biogenesis GTPase A		Cytoplasmic	0	0			@Intracellular	Cytoplasmic
O32241	sdpI	Immunity protein SdpI	Yes	CytoplasmicMembrane	6	0			@Multi-transmembrane	Membrane
P12049	yexA	UPF0062 protein YexA		Cytoplasmic	0	0			@Intracellular	Cytoplasmic
P32727	nusA	Transcription termination/antitermination protein NusA		Cytoplasmic	0	0			@Intracellular	Cytoplasmic
O34318	yloU	Uncharacterized protein YloU		Cytoplasmic	0	0			@Intracellular	Cytoplasmic
P54447	yqeB	Uncharacterized protein YqeB	Yes	Cytoplasmic	2	0			@Multi-transmembrane	Membrane
P54178	ypmQ	SCO1 protein homolog (BsSco)	Yes	CytoplasmicMembrane	0	Y		Yes	@N-terminally anchored (No CS)	Membrane	PS51257
P24072	cheY	Chemotaxis protein CheY		Cytoplasmic	0	0			@Intracellular	Cytoplasmic
P96501	flgL	Flagellar hook-associated protein 3 (HAP3)		Cytoplasmic	0	0			@Intracellular	Cytoplasmic
O34580	pcrA	ATP-dependent DNA helicase PcrA (EC 3.6.4.12)		Cytoplasmic	0	0			@Intracellular	Cytoplasmic
Q01463	minC	Septum site-determining protein MinC		Cytoplasmic	0	0			@Intracellular	Cytoplasmic
Q45064	plsY	Glycerol-3-phosphate acyltransferase (Acyl-PO4 G3P acyltransferase) (Acyl-phosphate--glycerol-3-phosphate acyltransferase) (G3P acyltransferase) (GPAT) (EC 2.3.1.n3) (Lysophosphatidic acid synthase) (LPA synthase)	Yes	CytoplasmicMembrane	3	Y			@Multi-transmembrane	Membrane	GO:0005886|IPR003811|PF02660|PTHR30309:SF0|MF_01043|TIGR00023
P45711	yneK	Uncharacterized protein YneK	Yes	CytoplasmicMembrane	1	0			@N-terminally anchored (No CS)	Membrane
O34660	dhaS	Putative aldehyde dehydrogenase DhaS (EC 1.2.1.3)		Cytoplasmic	0	0			@Intracellular	Cytoplasmic
Q45461	opuBB	Choline transport system permease protein OpuBB	Yes	CytoplasmicMembrane	5	0			@Multi-transmembrane	Membrane	GO:0016020|IPR000515|SSF161098|PF00528|G3DSA:1.10.3720.10|PS50928
P71043	ywnH	Putative phosphinothricin acetyltransferase YwnH (PPT N-acetyltransferase) (EC 2.3.1.183)		Unknown	0	0			@Intracellular	Cytoplasmic
P45913	yqaP	Uncharacterized protein YqaP		Cytoplasmic	0	0			@Intracellular	Cytoplasmic
P34958	qoxC	Quinol oxidase subunit 3 (EC 1.10.3.-) (Oxidase aa(3)-600 subunit 3) (Quinol oxidase aa3-600, subunit QoxC) (Quinol oxidase polypeptide III)	Yes	CytoplasmicMembrane	5	0			@Multi-transmembrane	Membrane	GO:0016020|GO:0016021|IPR024791|IPR000298|IPR014246|IPR013833|PTHR11403|PF00510|TIGR02897|PS50253|SSF81452|G3DSA:1.20.120.80
O34911	ykoF	Putative HMP/thiamine-binding protein YkoF		Cytoplasmic	0	0			@Intracellular	Cytoplasmic
P18159	pgcA	Phosphoglucomutase (PGM) (EC 5.4.2.2) (Alpha-phosphoglucomutase) (Glucose phosphomutase)		Cytoplasmic	0	0			@Intracellular	Cytoplasmic
O32153	frlD	Fructosamine kinase FrlD (EC 2.7.1.-)		Cytoplasmic	0	0			@Intracellular	Cytoplasmic
P39582	menA	Probable 1,4-dihydroxy-2-naphthoate octaprenyltransferase (DHNA-octaprenyltransferase) (EC 2.5.1.74)	Yes	CytoplasmicMembrane	8	0			@Multi-transmembrane	Membrane	GO:0016021|IPR004657|IPR000537|TIGR00751|PF01040
O31634	yjcL	Uncharacterized membrane protein YjcL	Yes	CytoplasmicMembrane	11	0			@Multi-transmembrane	Membrane
P42978	ypjC	UPF0750 membrane protein YpjC	Yes	CytoplasmicMembrane	6	0			@Multi-transmembrane	Membrane	IPR003740|PF02588|PIRSF006483
P24469	cccA	Cytochrome c-550 (Cytochrome c A)	Yes	CytoplasmicMembrane	1	0			@N-terminally anchored (No CS)	Membrane	GO:0016021|IPR012218|PIRSF000025
P12669	nin	DNA-entry nuclease inhibitor (Competence protein J)	Yes	CytoplasmicMembrane	0	0			@Intracellular	Cytoplasmic	IPR020354|PD081734
O05260	mrpC	Na(+)/H(+) antiporter subunit C (Mrp complex subunit C) (Multiple resistance and pH homeostasis protein C)	Yes	CytoplasmicMembrane	3	0			@Multi-transmembrane	Membrane
P54478	yqfU	UPF0750 membrane protein YqfU	Yes	CytoplasmicMembrane	6	0			@Multi-transmembrane	Membrane	IPR003740|PIRSF006483|PF02588
Q05852	gtaB	UTP--glucose-1-phosphate uridylyltransferase (EC 2.7.7.9) (Alpha-D-glucosyl-1-phosphate uridylyltransferase) (General stress protein 33) (GSP33) (UDP-glucose pyrophosphorylase) (UDPGP) (Uridine diphosphoglucose pyrophosphorylase)		Cytoplasmic	0	Y			@Secretory(released) (with CS)	Extracellular
P50829	ypqE	Putative phosphotransferase enzyme IIA component YpqE (EC 2.7.1.-) (Putative PTS system EIIA component)		Cytoplasmic	0	0			@Intracellular	Cytoplasmic
P51777	cspD	Cold shock protein CspD		Cytoplasmic	0	0			@Intracellular	Cytoplasmic
O31635	yjcM	Uncharacterized protein YjcM		Unknown	0	Y			@Secretory(released) (with CS)	Extracellular
O05236	yugG	Uncharacterized HTH-type transcriptional regulator YugG		Cytoplasmic	0	0			@Intracellular	Cytoplasmic
O07573	nsrR	HTH-type transcriptional regulator NsrR		Cytoplasmic	0	0			@Intracellular	Cytoplasmic
P17921	pheS	Phenylalanine--tRNA ligase alpha subunit (EC 6.1.1.20) (Phenylalanyl-tRNA synthetase alpha subunit) (PheRS)		Cytoplasmic	0	0			@Intracellular	Cytoplasmic
O06980	yvcR	Uncharacterized ABC transporter ATP-binding protein YvcR (EC 3.6.3.-)	Yes	CytoplasmicMembrane	0	0			@Intracellular	Cytoplasmic
O32087	yuzA	Uncharacterized membrane protein YuzA	Yes	CytoplasmicMembrane	2	0			@Multi-transmembrane	Membrane
O31618	thiG	Thiazole synthase (EC 2.8.1.10)		Cytoplasmic	0	0			@Intracellular	Cytoplasmic
P51785	ilvD	Dihydroxy-acid dehydratase (DAD) (EC 4.2.1.9) (Vegetative protein 110) (VEG110)		Cytoplasmic	0	0			@Intracellular	Cytoplasmic
O06745	yitJ	Bifunctional homocysteine S-methyltransferase/5,10-methylenetetrahydrofolate reductase [Includes: Homocysteine S-methyltransferase (EC 2.1.1.10) (S-methylmethionine:homocysteine methyltransferase); 5,10-methylenetetrahydrofolate reductase (EC 1.5.1.20)]		Cytoplasmic	0	0			@Intracellular	Cytoplasmic
P04948	thrB	Homoserine kinase (HK) (HSK) (EC 2.7.1.39)		Unknown	0	0			@Intracellular	Cytoplasmic
P28670	yoxC	Uncharacterized protein YoxC	Yes	Unknown	1	0			@N-terminally anchored (No CS)	Membrane
P37812	atpC	ATP synthase epsilon chain (ATP synthase F1 sector epsilon subunit) (F-ATPase epsilon subunit)		Cytoplasmic	0	0			@Intracellular	Cytoplasmic
O34916	ykuR	N-acetyldiaminopimelate deacetylase (EC 3.5.1.47)		Cytoplasmic	0	0			@Intracellular	Cytoplasmic
P39155	ywlE	Low molecular weight protein-tyrosine-phosphatase YwlE (LMPTP) (EC 3.1.3.48)		Cytoplasmic	0	0			@Intracellular	Cytoplasmic
O32164	csd	Probable cysteine desulfurase (EC 2.8.1.7)		Cytoplasmic	0	0			@Intracellular	Cytoplasmic
O31427	skfE	SkfA peptide export ATP-binding protein SkfE (EC 3.6.3.25)	Yes	CytoplasmicMembrane	0	0			@Intracellular	Cytoplasmic
O34860	rsbRB	RsbT co-antagonist protein RsbRB (Stressosome protein RsbRB)		Cytoplasmic	0	0			@Intracellular	Cytoplasmic
P25971	pyrF	Orotidine 5'-phosphate decarboxylase (EC 4.1.1.23) (OMP decarboxylase) (OMPDCase) (OMPdecase)		Cytoplasmic	0	0			@Intracellular	Cytoplasmic
O34751	yloV	Uncharacterized protein YloV		Unknown	0	0			@Intracellular	Cytoplasmic
O31930	yopH	SPBc2 prophage-derived uncharacterized protein YopH	Yes	CytoplasmicMembrane	2	0			@Multi-transmembrane	Membrane
P45917	yqbA	Uncharacterized protein YqbA		Cytoplasmic	0	0			@Intracellular	Cytoplasmic
P54325	xkdE	Phage-like element PBSX protein XkdE		Cytoplasmic	0	0			@Intracellular	Cytoplasmic
P39803	yitT	UPF0750 membrane protein YitT	Yes	CytoplasmicMembrane	6	0			@Multi-transmembrane	Membrane	IPR003740|PIRSF006483|PF02588
P35160	resA	Thiol-disulfide oxidoreductase ResA	Yes	CytoplasmicMembrane	1	0			@N-terminally anchored (No CS)	Membrane	GO:0005886|IPR023555|MF_01319
P13267	polC	DNA polymerase III PolC-type (PolIII) (EC 2.7.7.7)		Cytoplasmic	0	0			@Intracellular	Cytoplasmic
P54534	yqiW	UPF0403 protein YqiW		Cytoplasmic	0	0			@Intracellular	Cytoplasmic
Q45479	lspA	Lipoprotein signal peptidase (EC 3.4.23.36) (Prolipoprotein signal peptidase) (Signal peptidase II) (SPase II)	Yes	CytoplasmicMembrane	3	0			@Multi-transmembrane	Membrane	GO:0016020|IPR001872|PS00855|PR00781|PF01252|TIGR00077|MF_00161
Q07428	nrgB	Nitrogen regulatory PII-like protein	Yes	CytoplasmicMembrane	0	0			@Intracellular	Cytoplasmic
P70995	ywhC	Putative zinc metalloprotease YwhC (EC 3.4.24.-)	Yes	CytoplasmicMembrane	5	0			@Multi-transmembrane	Membrane
P45745	dhbF	Dimodular nonribosomal peptide synthase		Cytoplasmic	0	0			@Intracellular	Cytoplasmic
P39134	prkA	Protein PrkA		Cytoplasmic	0	0			@Intracellular	Cytoplasmic
P49785	spoIIIAH	Stage III sporulation protein AH	Yes	Unknown	1	0			@N-terminally anchored (No CS)	Membrane
P96619	ydcC	Sporulation protein YdcC	Yes	Unknown	0	Y			@Lipid anchored	Extracellular	IPR029046|PS51257|SSF89392
P46898	rplF	50S ribosomal protein L6 (BL10)		Cytoplasmic	0	0			@Intracellular	Cytoplasmic
P53558	bioD	ATP-dependent dethiobiotin synthetase BioD (EC 6.3.3.3) (DTB synthetase) (DTBS) (Dethiobiotin synthase)		Cytoplasmic	0	0			@Intracellular	Cytoplasmic
P35149	spoIVA	Stage IV sporulation protein A (EC 3.6.1.3) (Coat morphogenetic protein SpoIVA)		Cytoplasmic	0	0			@Intracellular	Cytoplasmic
O34600	nrnA	Bifunctional oligoribonuclease and PAP phosphatase NrnA (EC 3.1.-.-) (3'(2'),5'-bisphosphate nucleotidase) (EC 3.1.3.7) (3'-phosphoadenosine 5'-phosphate phosphatase) (PAP phosphatase) (nanoRNase)		Cytoplasmic	0	0			@Intracellular	Cytoplasmic
P05648	dnaA	Chromosomal replication initiator protein DnaA		Cytoplasmic	0	0			@Intracellular	Cytoplasmic
P25052	tenA	Thiaminase-2 (EC 3.5.99.2) (Thiaminase II) (Transcriptional activator TenA)		Cytoplasmic	0	0			@Intracellular	Cytoplasmic
O32231	rnr	Ribonuclease R (RNase R) (EC 3.1.13.1) (VacB protein homolog)		Cytoplasmic	0	0			@Intracellular	Cytoplasmic
Q45499	suhB	Inositol-1-monophosphatase (I-1-Pase) (IMPase) (Inositol-1-phosphatase) (EC 3.1.3.25)		Cytoplasmic	0	0			@Intracellular	Cytoplasmic
P29726	purA	Adenylosuccinate synthetase (AMPSase) (AdSS) (EC 6.3.4.4) (IMP--aspartate ligase)		Cytoplasmic	0	0			@Intracellular	Cytoplasmic
O07597	dat	D-alanine aminotransferase (EC 2.6.1.21) (D-amino acid aminotransferase) (D-amino acid transaminase) (DAAT) (D-aspartate aminotransferase)		Unknown	0	0			@Intracellular	Cytoplasmic
P42085	xpt	Xanthine phosphoribosyltransferase (XPRTase) (EC 2.4.2.22)		Cytoplasmic	0	0			@Intracellular	Cytoplasmic
P54596	tcyP	L-cystine uptake protein TcyP (Symporter YhcL) (Transporter of cystine TcyP)	Yes	CytoplasmicMembrane	11	0			@Multi-transmembrane	Membrane	GO:0016020|IPR001991|G3DSA:1.10.3860.10|PR00173|SSF118215|PF00375|PTHR11958
P55874	rpmI	50S ribosomal protein L35		Cytoplasmic	0	0			@Intracellular	Cytoplasmic
C0SP93	accD	Acetyl-coenzyme A carboxylase carboxyl transferase subunit beta (ACCase subunit beta) (Acetyl-CoA carboxylase carboxyltransferase subunit beta) (EC 6.4.1.2)		Cytoplasmic	0	0			@Intracellular	Cytoplasmic
O34618	ytnA	Uncharacterized amino acid permease YtnA	Yes	CytoplasmicMembrane	12	0			@Multi-transmembrane	Membrane	GO:0016020|GO:0016021|IPR002293|IPR004841|IPR004840|PIRSF006060|PTHR11785|PF00324|PS00218
P94446	coxA	Sporulation cortex protein CoxA	Yes	Unknown	0	Y			@Lipid anchored	Extracellular	IPR019076|PF09580|PS51257
P94415	rapC	Response regulator aspartate phosphatase C (EC 3.1.-.-)		Cytoplasmic	0	0			@Intracellular	Cytoplasmic
P54470	yqfL	Putative pyruvate, phosphate dikinase regulatory protein (PPDK regulatory protein) (EC 2.7.11.32) (EC 2.7.4.27)		Cytoplasmic	0	0			@Intracellular	Cytoplasmic
P54382	folD	Bifunctional protein FolD [Includes: Methylenetetrahydrofolate dehydrogenase (EC 1.5.1.5); Methenyltetrahydrofolate cyclohydrolase (EC 3.5.4.9)]		Cytoplasmic	0	0			@Intracellular	Cytoplasmic
O34861	yoaC	Putative sugar kinase YoaC (EC 2.7.1.-)		Cytoplasmic	0	0			@Intracellular	Cytoplasmic
P35528	fliP	Flagellar biosynthetic protein FliP	Yes	CytoplasmicMembrane	4	0			@Multi-transmembrane	Membrane	GO:0016020|IPR005838|IPR005837|PF00813|PS01060|PTHR30587:SF0|TIGR01103|PR01302|PS01061|PR00951
P46333	csbC	Probable metabolite transport protein CsbC	Yes	CytoplasmicMembrane	12	0			@Multi-transmembrane	Membrane	GO:0016021|GO:0016020|IPR005828|IPR003663|IPR005829|PF00083|PR00171|PS00217|PS00216|TIGR00879
P39696	comER	ComE operon protein 4		Cytoplasmic	0	0			@Intracellular	Cytoplasmic
P42312	nupG	Purine nucleoside transport protein NupG	Yes	CytoplasmicMembrane	11	Y			@Multi-transmembrane(Lipid modified N-termini)	Membrane	GO:0016020|IPR018270|IPR008276|TIGR00804|PTHR10590
P37528	pdxT	Glutamine amidotransferase subunit PdxT (EC 2.6.-.-) (Glutamine amidotransferase glutaminase subunit PdxT)		Cytoplasmic	0	0			@Intracellular	Cytoplasmic
O31784	pksR	Polyketide synthase PksR (EC 2.3.1.-)	Yes	CytoplasmicMembrane	0	0			@Intracellular	Cytoplasmic
P37474	mfd	Transcription-repair-coupling factor (TRCF) (EC 3.6.4.-)		Cytoplasmic	0	0			@Intracellular	Cytoplasmic
P39644	ywfH	Bacilysin biosynthesis oxidoreductase YwfH (EC 1.-.-.-)		Cytoplasmic	0	Y			@Intracellular	Cytoplasmic
P22326	tyrS1	Tyrosine--tRNA ligase 1 (EC 6.1.1.1) (Tyrosyl-tRNA synthetase 1) (TyrRS 1)		Cytoplasmic	0	0			@Intracellular	Cytoplasmic
O07598	yhaA	Putative amidohydrolase YhaA (EC 3.5.1.-)		Cytoplasmic	0	0			@Intracellular	Cytoplasmic
P68729	argB	Acetylglutamate kinase (EC 2.7.2.8) (N-acetyl-L-glutamate 5-phosphotransferase) (NAG kinase) (AGK)		Cytoplasmic	0	0			@Intracellular	Cytoplasmic
P37875	spoVR	Stage V sporulation protein R		Cytoplasmic	0	0			@Intracellular	Cytoplasmic
P42920	rplC	50S ribosomal protein L3 (BL3)		Cytoplasmic	0	0			@Intracellular	Cytoplasmic
P18157	glpK	Glycerol kinase (EC 2.7.1.30) (ATP:glycerol 3-phosphotransferase) (Glycerokinase) (GK)		Cytoplasmic	0	0			@Intracellular	Cytoplasmic
P14016	cotE	Spore coat protein E		Cytoplasmic	0	0			@Intracellular	Cytoplasmic
O35006	hisA	1-(5-phosphoribosyl)-5-[(5-phosphoribosylamino)methylideneamino] imidazole-4-carboxamide isomerase (EC 5.3.1.16) (Phosphoribosylformimino-5-aminoimidazole carboxamide ribotide isomerase)		Cytoplasmic	0	0			@Intracellular	Cytoplasmic
O31716	ykpA	Uncharacterized ABC transporter ATP-binding protein YkpA		Cytoplasmic	0	0			@Intracellular	Cytoplasmic
P55872	infC	Translation initiation factor IF-3		Cytoplasmic	0	0			@Intracellular	Cytoplasmic
P50620	nrdE	Ribonucleoside-diphosphate reductase subunit alpha (EC 1.17.4.1) (Ribonucleotide reductase large subunit)		Cytoplasmic	0	0			@Intracellular	Cytoplasmic
P70965	murAA	UDP-N-acetylglucosamine 1-carboxyvinyltransferase 1 (EC 2.5.1.7) (Enoylpyruvate transferase 1) (UDP-N-acetylglucosamine enolpyruvyl transferase 1) (EPT 1)		Cytoplasmic	0	0			@Intracellular	Cytoplasmic
O34563	glnH	ABC transporter glutamine-binding protein GlnH	Yes	CytoplasmicMembrane	0	Y		Yes	@Lipid anchored	Extracellular	GO:0016020|IPR001320|SM00079|PS51257
P42113	asnH	Asparagine synthetase [glutamine-hydrolyzing] 2 (EC 6.3.5.4)		Cytoplasmic	0	0			@Intracellular	Cytoplasmic
P80885	pyk	Pyruvate kinase (PK) (EC 2.7.1.40) (Vegetative protein 17) (VEG17)		Cytoplasmic	0	0			@Intracellular	Cytoplasmic
P39072	gerM	Spore germination protein GerM	Yes	Unknown	0	Y		Yes	@Lipid anchored	Extracellular	PS51257
P29727	guaA	GMP synthase [glutamine-hydrolyzing] (EC 6.3.5.2) (GMP synthetase) (Glutamine amidotransferase)		Cytoplasmic	0	0			@Intracellular	Cytoplasmic
P12012	gntP	Gluconate permease	Yes	CytoplasmicMembrane	11	Y			@Multi-transmembrane	Membrane	GO:0016020|IPR003474|PTHR30354:SF1|PIRSF002746|TIGR00791|PF02447
O31751	uppS	Isoprenyl transferase (EC 2.5.1.-)		Cytoplasmic	0	0			@Intracellular	Cytoplasmic
Q45462	opuBC	Choline-binding protein	Yes	CytoplasmicMembrane	0	Y		Yes	@Lipid anchored	Extracellular	PS51257
O31593	yhbJ	Putative efflux system component YhbJ	Yes	CytoplasmicMembrane	1	0			@N-terminally anchored (No CS)	Membrane
O31753	dxr	1-deoxy-D-xylulose 5-phosphate reductoisomerase (DXP reductoisomerase) (EC 1.1.1.267) (1-deoxyxylulose-5-phosphate reductoisomerase) (2-C-methyl-D-erythritol 4-phosphate synthase)		Cytoplasmic	0	0			@Intracellular	Cytoplasmic
O34328	gmk	Guanylate kinase (EC 2.7.4.8) (GMP kinase)		Cytoplasmic	0	Y			@Intracellular	Cytoplasmic
P07343	fumC	Fumarate hydratase class II (Fumarase C) (EC 4.2.1.2)		Cytoplasmic	0	0			@Intracellular	Cytoplasmic
P80860	pgi	Glucose-6-phosphate isomerase (GPI) (EC 5.3.1.9) (Phosphoglucose isomerase) (PGI) (Phosphohexose isomerase) (PHI) (Vegetative protein 54) (VEG54)		Cytoplasmic	0	0			@Intracellular	Cytoplasmic
P37572	radA	DNA repair protein RadA homolog (DNA repair protein Sms homolog)	Yes	CytoplasmicMembrane	0	0			@Intracellular	Cytoplasmic
O32104	bioYB	Putative biotin transporter BioYB	Yes	CytoplasmicMembrane	6	0			@Multi-transmembrane	Membrane	GO:0005886|IPR003784|PF02632|PIRSF016661
P25053	tenI	Regulatory protein TenI		Cytoplasmic	0	0			@Intracellular	Cytoplasmic
P96715	ywqC	Probable capsular polysaccharide biosynthesis protein YwqC	Yes	CytoplasmicMembrane	2	0			@Multi-transmembrane	Membrane	GO:0016020|IPR003856|PF02706
Q45539	csbB	Putative glycosyltransferase CsbB (EC 2.4.-.-)	Yes	CytoplasmicMembrane	2	0			@Multi-transmembrane	Membrane
Q01620	jag	Protein jag (SpoIIIJ-associated protein)		Cytoplasmic	0	0			@Intracellular	Cytoplasmic
O34798	pdaC	Peptidoglycan-N-acetylmuramic acid deacetylase PdaC (Peptidoglycan MurNAc deacetylase) (EC 3.5.1.-) (Polysaccharide deacetylase PdaC)	Yes	Cytoplasmic	1	0			@N-terminally anchored (No CS)	Membrane
O31629	yjcG	UPF0477 protein YjcG		Cytoplasmic	0	0			@Intracellular	Cytoplasmic
O34722	yfmG	Uncharacterized protein YfmG		Cytoplasmic	0	0			@Intracellular	Cytoplasmic
P54601	yhcQ	Spore coat protein F-like protein YhcQ		Unknown	0	0			@Intracellular	Cytoplasmic
P94459	ppsD	Plipastatin synthase subunit D (EC 2.3.1.-) (Peptide synthase 4) [Includes: ATP-dependent proline adenylase (ProA 1) (Proline activase 1); ATP-dependent glutamine adenylase (GlnA) (Glutamine activase); ATP-dependent tyrosine adenylase 2 (TyrA 2) (Tyrosine activase 2)]		Unknown	0	0			@Intracellular	Cytoplasmic
P36843	argJ	Arginine biosynthesis bifunctional protein ArgJ [Cleaved into: Arginine biosynthesis bifunctional protein ArgJ alpha chain; Arginine biosynthesis bifunctional protein ArgJ beta chain] [Includes: Glutamate N-acetyltransferase (EC 2.3.1.35) (Ornithine acetyltransferase) (OATase) (Ornithine transacetylase); Amino-acid acetyltransferase (EC 2.3.1.1) (N-acetylglutamate synthase) (AGSase)]		Cytoplasmic	0	0			@Intracellular	Cytoplasmic
P39141	nupC	Pyrimidine nucleoside transport protein	Yes	CytoplasmicMembrane	9	Y			@Multi-transmembrane	Membrane	GO:0016020|IPR008276|IPR018270|PTHR10590|TIGR00804
P46348	yeaB	Uncharacterized transporter YeaB	Yes	CytoplasmicMembrane	6	0			@Multi-transmembrane	Membrane	GO:0016021|IPR027469|IPR002524|G3DSA:1.20.1510.10|PF01545|TIGR01297|PTHR11562
P39070	clpQ	ATP-dependent protease subunit ClpQ (EC 3.4.21.-)		Cytoplasmic	0	0			@Intracellular	Cytoplasmic
P94417	yclM	Aspartokinase 3 (EC 2.7.2.4) (Aspartate kinase 3) (Aspartokinase III)		Cytoplasmic	0	0			@Intracellular	Cytoplasmic
O32129	lipA	Lipoyl synthase (EC 2.8.1.8) (Lip-syn) (LS) (Lipoate synthase) (Lipoic acid synthase) (Sulfur insertion protein LipA)		Cytoplasmic	0	0			@Intracellular	Cytoplasmic
O34431	yloB	Calcium-transporting ATPase (EC 3.6.3.8) (Calcium pump)	Yes	CytoplasmicMembrane	10	0			@Multi-transmembrane	Membrane	GO:0016021|IPR005782|IPR001757|IPR023298|TIGR01116|PR00119|TIGR01494|PR00120|G3DSA:1.20.1110.10
Q796K8	pbpH	Penicillin-binding protein H	Yes	CytoplasmicMembrane	1	0			@N-terminally anchored (No CS)	Membrane
P71044	spoIIQ	Stage II sporulation protein Q	Yes	Unknown	1	0			@N-terminally anchored (No CS)	Membrane
O32165	sufD	FeS cluster assembly protein SufD		Unknown	0	0			@Intracellular	Cytoplasmic
P11044	thyA2	Thymidylate synthase 2 (TS 2) (TSase 2) (EC 2.1.1.45) (Thymidylate synthase B) (TS B) (TSase B)		Cytoplasmic	0	0			@Intracellular	Cytoplasmic
O35033	coaBC	Probable coenzyme A biosynthesis bifunctional protein CoaBC (DNA/pantothenate metabolism flavoprotein) [Includes: Phosphopantothenoylcysteine decarboxylase (PPCDC) (EC 4.1.1.36) (CoaC); Phosphopantothenate--cysteine ligase (EC 6.3.2.5) (CoaB) (PPC synthetase) (PPCS) (Phosphopantothenoylcysteine synthase)]	Yes	Cytoplasmic	0	Y			@N-terminally anchored (with CS)	Membrane
P10728	spoIIAB	Anti-sigma F factor (EC 2.7.11.1) (Stage II sporulation protein AB)		Cytoplasmic	0	0			@Intracellular	Cytoplasmic
P42409	rsbRA	RsbT co-antagonist protein RsbRA (Stressosome protein RsbRA)	Yes	Cytoplasmic	0	0			@Intracellular	Cytoplasmic	PD936484
C0SP78	ydfM	Uncharacterized transporter YdfM	Yes	CytoplasmicMembrane	6	0			@Multi-transmembrane	Membrane	GO:0016021|IPR002524|IPR027469|PF01545|PTHR11562|G3DSA:1.20.1510.10|TIGR01297
P27620	tagA	Putative N-acetylmannosaminyltransferase (EC 2.4.1.187) (Major teichoic acid biosynthesis protein A) (N-acetylglucosaminyldiphospho-undecaprenol N-acetyl-beta-D-mannosaminyltransferase) (UDP-N-acetylmannosamine transferase)	Yes	CytoplasmicMembrane	0	0			@Intracellular	Cytoplasmic
P40871	dhbE	2,3-dihydroxybenzoate-AMP ligase (EC 6.3.2.-) (Dihydroxybenzoic acid-activating enzyme)		Cytoplasmic	0	0			@Intracellular	Cytoplasmic
P39142	pdp	Pyrimidine-nucleoside phosphorylase (PYNP) (EC 2.4.2.2)		Cytoplasmic	0	0			@Intracellular	Cytoplasmic
O34677	glnQ	Glutamine transport ATP-binding protein GlnQ (EC 3.6.3.-)	Yes	CytoplasmicMembrane	0	0			@Intracellular	Cytoplasmic
O34593	yjqA	Uncharacterized protein YjqA		Cytoplasmic	0	0			@Intracellular	Cytoplasmic
P36838	carA	Carbamoyl-phosphate synthase arginine-specific small chain (EC 6.3.5.5) (Carbamoyl-phosphate synthetase glutamine chain)		Unknown	0	0			@Intracellular	Cytoplasmic
O06973	yvcJ	UPF0042 nucleotide-binding protein YvcJ		Cytoplasmic	0	0			@Intracellular	Cytoplasmic
P42964	ycsG	Uncharacterized membrane protein YcsG	Yes	CytoplasmicMembrane	11	0			@Multi-transmembrane	Membrane	GO:0016020|IPR001046|PTHR11706|PF01566
O34863	uvrA	UvrABC system protein A (UvrA protein) (Excinuclease ABC subunit A)		Cytoplasmic	0	0			@Intracellular	Cytoplasmic
P50743	der	GTPase Der (GTP-binding protein EngA)	Yes	CytoplasmicMembrane	0	0			@Intracellular	Cytoplasmic
P54608	yhcX	Hydrolase YhcX (EC 3.5.-.-)		Cytoplasmic	0	0			@Intracellular	Cytoplasmic
P31847	ypuA	Uncharacterized protein YpuA (ORFX19)	Yes	Unknown	0	Y			@N-terminally anchored (with CS)	Membrane
O06746	yitK	UPF0234 protein yitk		Cytoplasmic	0	0			@Intracellular	Cytoplasmic
O32204	yvsH	Putative arginine/ornithine antiporter	Yes	CytoplasmicMembrane	12	0			@Multi-transmembrane	Membrane	GO:0016020|IPR002293|PTHR11785|PIRSF006060|PF13520
P19994	map	Methionine aminopeptidase 1 (MAP 1) (MetAP 1) (EC 3.4.11.18) (Peptidase M)		Cytoplasmic	0	0			@Intracellular	Cytoplasmic
P39845	ppsA	Plipastatin synthase subunit A (EC 2.3.1.-) (Peptide synthase 1) [Includes: ATP-dependent glutamate adenylase 1 (GluA 1) (Glutamate activase 1); ATP-dependent ornithine adenylase (OrnA) (Ornithine activase)]		Cytoplasmic	0	0			@Intracellular	Cytoplasmic
O34667	luxS	S-ribosylhomocysteine lyase (EC 4.4.1.21) (AI-2 synthesis protein) (Autoinducer-2 production protein LuxS)		Cytoplasmic	0	0			@Intracellular	Cytoplasmic
P31113	ubiE	Demethylmenaquinone methyltransferase (EC 2.1.1.163) (Menaquinone biosynthesis C-methyltransferase UbiE) (Spore germination protein C2)		Cytoplasmic	0	0			@Intracellular	Cytoplasmic
P37465	metG	Methionine--tRNA ligase (EC 6.1.1.10) (Methionyl-tRNA synthetase) (MetRS)		Cytoplasmic	0	0			@Intracellular	Cytoplasmic
P19670	murAB	UDP-N-acetylglucosamine 1-carboxyvinyltransferase 2 (EC 2.5.1.7) (Enoylpyruvate transferase 2) (UDP-N-acetylglucosamine enolpyruvyl transferase 2) (EPT 2)	Yes	Cytoplasmic	1	0			@Intracellular	Cytoplasmic
P39149	upp	Uracil phosphoribosyltransferase (EC 2.4.2.9) (UMP pyrophosphorylase) (UPRTase)		Cytoplasmic	0	0			@Intracellular	Cytoplasmic
P17906	rsbX	Phosphoserine phosphatase RsbX (EC 3.1.3.3) (Sigma-B negative effector)		Cytoplasmic	0	0			@Intracellular	Cytoplasmic
P20964	obg	GTPase ObgE (GTP-binding protein Obg) (OrfA) (Spo0B-associated GTP-binding protein)		Cytoplasmic	0	0			@Intracellular	Cytoplasmic
P80870	yugI	General stress protein 13 (GSP13)		Cytoplasmic	0	0			@Intracellular	Cytoplasmic
O34577	cysC	Probable adenylyl-sulfate kinase (EC 2.7.1.25) (APS kinase) (ATP adenosine-5'-phosphosulfate 3'-phosphotransferase) (Adenosine-5'-phosphosulfate kinase)	Yes	CytoplasmicMembrane	0	0			@Intracellular	Cytoplasmic
O32099	yueD	Benzil reductase ((S)-benzoin forming) (EC 1.1.1.320)		Cytoplasmic	0	0			@Intracellular	Cytoplasmic
P20691	aroE	3-phosphoshikimate 1-carboxyvinyltransferase (EC 2.5.1.19) (5-enolpyruvylshikimate-3-phosphate synthase) (EPSP synthase) (EPSPS)		Cytoplasmic	0	0			@Intracellular	Cytoplasmic
P40778	murC	UDP-N-acetylmuramate--L-alanine ligase (EC 6.3.2.8) (UDP-N-acetylmuramoyl-L-alanine synthetase)		Cytoplasmic	0	0			@Intracellular	Cytoplasmic
P54523	dxs	1-deoxy-D-xylulose-5-phosphate synthase (EC 2.2.1.7) (1-deoxyxylulose-5-phosphate synthase) (DXP synthase) (DXPS)		Cytoplasmic	0	0			@Intracellular	Cytoplasmic
P54552	proI	Pyrroline-5-carboxylate reductase 2 (P5C reductase 2) (P5CR 2) (EC 1.5.1.2)		Cytoplasmic	0	0			@Intracellular	Cytoplasmic
O31623	yjcA	Sporulation protein YjcA	Yes	CytoplasmicMembrane	3	0			@Multi-transmembrane	Membrane
P96694	mhqP	Putative oxidoreductase MhqP (EC 1.-.-.-)	Yes	CytoplasmicMembrane	3	0			@Multi-transmembrane	Membrane
Q05873	valS	Valine--tRNA ligase (EC 6.1.1.9) (Valyl-tRNA synthetase) (ValRS)		Cytoplasmic	0	0			@Intracellular	Cytoplasmic
O32223	yvaA	Uncharacterized oxidoreductase YvaA (EC 1.-.-.-)		Cytoplasmic	0	0			@Intracellular	Cytoplasmic
P36430	leuS	Leucine--tRNA ligase (EC 6.1.1.4) (Leucyl-tRNA synthetase) (LeuRS)		Cytoplasmic	0	0			@Intracellular	Cytoplasmic
P25813	rsmG	Ribosomal RNA small subunit methyltransferase G (EC 2.1.1.-) (16S rRNA 7-methylguanosine methyltransferase) (16S rRNA m7G methyltransferase) (Glucose-inhibited division protein B)		Cytoplasmic	0	0			@Intracellular	Cytoplasmic
P37550	ispE	4-diphosphocytidyl-2-C-methyl-D-erythritol kinase (CMK) (EC 2.7.1.148) (4-(cytidine-5'-diphospho)-2-C-methyl-D-erythritol kinase)		Cytoplasmic	0	0			@Intracellular	Cytoplasmic
P94568	leuD	3-isopropylmalate dehydratase small subunit (EC 4.2.1.33) (Alpha-IPM isomerase) (IPMI) (Isopropylmalate isomerase)		Cytoplasmic	0	0			@Intracellular	Cytoplasmic
O31543	yfjQ	Putative metal ion transporter YfjQ	Yes	CytoplasmicMembrane	2	0			@Multi-transmembrane	Membrane	GO:0016020|IPR004488|IPR002523|TIGR00383|PF01544
P54475	cshB	DEAD-box ATP-dependent RNA helicase CshB (EC 3.6.4.13)		Cytoplasmic	0	0			@Intracellular	Cytoplasmic
P31112	hepS	Heptaprenyl diphosphate synthase component 1 (HepPP synthase subunit 1) (EC 2.5.1.30) (Spore germination protein C1)		Cytoplasmic	0	0			@Intracellular	Cytoplasmic
P94418	yclN	Uncharacterized ABC transporter permease protein YclN	Yes	CytoplasmicMembrane	8	Y			@Multi-transmembrane	Membrane	GO:0016020|IPR000522|PF01032|PTHR30472
P37472	hprT	Hypoxanthine-guanine phosphoribosyltransferase (HGPRT) (HGPRTase) (EC 2.4.2.8)		Cytoplasmic	0	0			@Intracellular	Cytoplasmic
O34946	znuC	High-affinity zinc uptake system ATP-binding protein ZnuC (EC 3.6.3.-)	Yes	CytoplasmicMembrane	0	0			@Intracellular	Cytoplasmic
P50831	ypvA	Probable ATP-dependent helicase YpvA (EC 3.6.4.12)		Cytoplasmic	0	0			@Intracellular	Cytoplasmic
P54511	lipM	Octanoyltransferase LipM (EC 2.3.1.181) (Octanoyl-[acyl-carrier-protein]:[GcvH] N-octanoyltransferase)		Cytoplasmic	0	0			@Intracellular	Cytoplasmic
O32034	yrrO	Uncharacterized protease YrrO (EC 3.4.-.-)		Cytoplasmic	0	0			@Intracellular	Cytoplasmic
O31423	skfB	Uncharacterized protein SkfB		Cytoplasmic	0	0			@Intracellular	Cytoplasmic
O34592	ydjP	AB hydrolase superfamily protein YdjP (EC 3.-.-.-)		Unknown	0	0			@Intracellular	Cytoplasmic
P96591	ydaP	Putative thiamine pyrophosphate-containing protein YdaP	Yes	CytoplasmicMembrane	0	0			@Intracellular	Cytoplasmic
O06986	yvdD	LOG family protein YvdD		Cytoplasmic	0	0			@Intracellular	Cytoplasmic
P42298	yxiF	Uncharacterized protein YxiF		Cytoplasmic	0	0			@Intracellular	Cytoplasmic
P54515	yqhQ	Uncharacterized protein YqhQ	Yes	CytoplasmicMembrane	4	0			@Multi-transmembrane	Membrane	IPR010787|PD131510
O32106	pepA	Probable cytosol aminopeptidase (EC 3.4.11.1) (Leucine aminopeptidase) (LAP) (EC 3.4.11.10) (Leucyl aminopeptidase)		Cytoplasmic	0	0			@Intracellular	Cytoplasmic
P54488	yqgF	Uncharacterized protein YqgF	Yes	CytoplasmicMembrane	1	0			@N-terminally anchored (No CS)	Membrane
O34309	pps	Putative phosphoenolpyruvate synthase (Putative PEP synthase) (Pyruvate, water dikinase)	Yes	CytoplasmicMembrane	0	0			@Intracellular	Cytoplasmic
O34840	chaA	Ca(2+)/H(+) antiporter ChaA	Yes	CytoplasmicMembrane	10	Y			@Multi-transmembrane	Membrane	GO:0016021|IPR004713|IPR004837|TIGR00846|PF01699
P50865	pdaB	Probable polysaccharide deacetylase PdaB (EC 3.-.-.-)	Yes	CytoplasmicMembrane	1	0			@N-terminally anchored (No CS)	Membrane
O34962	ytsJ	Probable NAD-dependent malic enzyme 4 (NAD-ME 4) (EC 1.1.1.38)		Cytoplasmic	0	0			@Intracellular	Cytoplasmic
P21473	rpsO	30S ribosomal protein S15 (BS18)		Cytoplasmic	0	0			@Intracellular	Cytoplasmic
P94498	cysH	Phosphoadenosine phosphosulfate reductase (EC 1.8.4.8) (3'-phosphoadenylylsulfate reductase) (PAPS reductase, thioredoxin dependent) (PAPS sulfotransferase) (PAdoPS reductase)	Yes	Cytoplasmic	1	0			@Intracellular	Cytoplasmic
P42244	ycbL	Uncharacterized transcriptional regulatory protein YcbL		Cytoplasmic	0	0			@Intracellular	Cytoplasmic
P37954	uvrB	UvrABC system protein B (Protein UvrB) (Excinuclease ABC subunit B) (Protein DinA)		Cytoplasmic	0	0			@Intracellular	Cytoplasmic
Q45498	yktB	UPF0637 protein YktB		Cytoplasmic	0	0			@Intracellular	Cytoplasmic
Q45477	ileS	Isoleucine--tRNA ligase (EC 6.1.1.5) (Isoleucyl-tRNA synthetase) (IleRS)		Cytoplasmic	0	0			@Intracellular	Cytoplasmic
O07539	yhaX	Stress response protein YhaX		Cytoplasmic	0	0			@Intracellular	Cytoplasmic
P39071	dhbA	2,3-dihydro-2,3-dihydroxybenzoate dehydrogenase (EC 1.3.1.28) (Cold shock protein CSI14)		Cytoplasmic	0	0			@Intracellular	Cytoplasmic
O31667	mtnX	2-hydroxy-3-keto-5-methylthiopentenyl-1-phosphate phosphatase (HK-MTPenyl-1-P phosphatase) (EC 3.1.3.87)		Cytoplasmic	0	0			@Intracellular	Cytoplasmic
P0CI73	glmS	Glutamine--fructose-6-phosphate aminotransferase [isomerizing] (EC 2.6.1.16) (D-fructose-6-phosphate amidotransferase) (GFAT) (Glucosamine-6-phosphate synthase) (Hexosephosphate aminotransferase) (L-glutamine--D-fructose-6-phosphate amidotransferase)		Cytoplasmic	0	0			@Intracellular	Cytoplasmic
O06493	opuE	Osmoregulated proline transporter (Sodium/proline symporter)	Yes	CytoplasmicMembrane	13	0			@Multi-transmembrane	Membrane	GO:0016020|GO:0016021|IPR019900|IPR001734|IPR018212|IPR011851|TIGR00813|PF00474|PS00456|PTHR11819|PS00457|TIGR02121|PS50283
P17904	rsbW	Serine-protein kinase RsbW (EC 2.7.11.1) (Anti-sigma-B factor) (Sigma-B negative effector RsbW)		Cytoplasmic	0	0			@Intracellular	Cytoplasmic
O31428	skfF	Putative bacteriocin-SkfA transport system permease protein SkfF	Yes	CytoplasmicMembrane	13	Y			@Multi-transmembrane	Membrane
P54451	yqeF	Uncharacterized lipoprotein YqeF	Yes	Cytoplasmic	0	Y		Yes	@Intracellular	Cytoplasmic	PS51257
O05267	yumB	NADH dehydrogenase-like protein YumB (EC 1.6.-.-)	Yes	CytoplasmicMembrane	0	0			@Intracellular	Cytoplasmic
P05653	gyrA	DNA gyrase subunit A (EC 5.99.1.3)		Cytoplasmic	0	0			@Intracellular	Cytoplasmic
O07634	ylaJ	Uncharacterized lipoprotein YlaJ	Yes	Unknown	0	Y		Yes	@Lipid anchored	Extracellular	IPR014247|IPR019076|PS51257|TIGR02898|PF09580
P39610	pdxK	Pyridoxine kinase (EC 2.7.1.35) (PN/PL/PM kinase) (Pyridoxal kinase) (Pyridoxamine kinase) (Vitamin B6 kinase)		Cytoplasmic	0	0			@Intracellular	Cytoplasmic
O34443	apt	Adenine phosphoribosyltransferase (APRT) (EC 2.4.2.7)		Cytoplasmic	0	0			@Intracellular	Cytoplasmic
O34944	ytjP	Putative dipeptidase YtjP (EC 3.4.13.-)		Cytoplasmic	0	0			@Intracellular	Cytoplasmic
P54169	ypgR	Uncharacterized protein YpgR		Cytoplasmic	0	0			@Intracellular	Cytoplasmic
P39778	clpY	ATP-dependent protease ATPase subunit ClpY		Cytoplasmic	0	0			@Intracellular	Cytoplasmic
P37468	rsmA	Ribosomal RNA small subunit methyltransferase A (EC 2.1.1.182) (16S rRNA (adenine(1518)-N(6)/adenine(1519)-N(6))-dimethyltransferase) (16S rRNA dimethyladenosine transferase) (16S rRNA dimethylase) (S-adenosylmethionine-6-N', N'-adenosyl(rRNA) dimethyltransferase)		Cytoplasmic	0	0			@Intracellular	Cytoplasmic
O34616	sdpB	Sporulation-delaying protein SdpB	Yes	CytoplasmicMembrane	6	0			@Multi-transmembrane	Membrane	IPR011020|PD027642|PD031536|SM00752
P0CI77	proH	Pyrroline-5-carboxylate reductase 1 (P5C reductase 1) (P5CR 1) (EC 1.5.1.2)	Yes	Cytoplasmic	0	Y			@N-terminally anchored (No CS)	Membrane
P46323	cinA	Putative competence-damage inducible protein	Yes	CytoplasmicMembrane	0	0			@Intracellular	Cytoplasmic
O07595	cobB	NAD-dependent protein deacetylase (EC 3.5.1.-) (Regulatory protein SIR2 homolog)		Cytoplasmic	0	0			@Intracellular	Cytoplasmic
P13792	phoP	Alkaline phosphatase synthesis transcriptional regulatory protein PhoP		Cytoplasmic	0	0			@Intracellular	Cytoplasmic
P54460	prmA	Ribosomal protein L11 methyltransferase (L11 Mtase) (EC 2.1.1.-)		Cytoplasmic	0	0			@Intracellular	Cytoplasmic
P42108	yxaI	Uncharacterized protein YxaI	Yes	CytoplasmicMembrane	3	0			@Multi-transmembrane	Membrane
P24136	oppD	Oligopeptide transport ATP-binding protein OppD (Stage 0 sporulation protein KD)	Yes	CytoplasmicMembrane	0	0			@Intracellular	Cytoplasmic	GO:0016020|IPR010066|TIGR01727
P13799	degS	Signal transduction histidine-protein kinase/phosphatase DegS (EC 2.7.13.3) (EC 3.1.3.-)	Yes	CytoplasmicMembrane	0	0			@Intracellular	Cytoplasmic	GO:0016021|IPR011712|PF07730
P94360	msmX	Maltodextrin import ATP-binding protein MsmX (EC 3.6.3.-)	Yes	CytoplasmicMembrane	0	0			@Intracellular	Cytoplasmic
P42318	yxjG	Uncharacterized protein YxjG		Cytoplasmic	0	0			@Intracellular	Cytoplasmic
O07620	bioY	Probable biotin transporter BioY	Yes	CytoplasmicMembrane	3	Y			@Multi-transmembrane	Membrane	GO:0005886|IPR003784|PIRSF016661|PF02632
Q45460	opuBA	Choline transport ATP-binding protein OpuBA	Yes	CytoplasmicMembrane	0	0			@Intracellular	Cytoplasmic	GO:0016020|IPR005892|TIGR01186
P94517	yscB	Uncharacterized protein YscB	Yes	Unknown	0	Y		Yes	@Lipid anchored	Extracellular	PS51257
P94546	yshE	UPF0719 transmembrane protein YshE	Yes	CytoplasmicMembrane	4	0			@Multi-transmembrane	Membrane
P51835	ftsY	Signal recognition particle receptor FtsY (SRP receptor)	Yes	CytoplasmicMembrane	0	0			@Intracellular	Cytoplasmic
P39595	efeU	Ferrous iron permease EfeU (Fe(2+) ion permease EfeU) (Ferrous iron uptake protein)	Yes	CytoplasmicMembrane	7	Y			@Multi-transmembrane	Membrane	GO:0016020|IPR004923|PTHR31632|PF03239
P39209	tlpC	Methyl-accepting chemotaxis protein TlpC	Yes	CytoplasmicMembrane	1	Y			@Multi-transmembrane	Membrane	GO:0016020|GO:0016021|IPR004090|IPR003660|IPR004089|PR00260|SM00304|PF00015|PF00672|SM00283|PS50111|PS50885
P26905	dppD	Dipeptide transport ATP-binding protein DppD	Yes	CytoplasmicMembrane	0	0			@Intracellular	Cytoplasmic	GO:0016020|IPR010066|TIGR01727
O32117	yutJ	NADH dehydrogenase-like protein YutJ (EC 1.6.-.-)	Yes	CytoplasmicMembrane	0	0			@Intracellular	Cytoplasmic
O34434	ydjG	Uncharacterized protein YdjG	Yes	Cytoplasmic	1	0			@Intracellular /TMH start AFTER 60	Cytoplasmic
O31539	yetJ	Uncharacterized protein YetJ	Yes	CytoplasmicMembrane	7	0			@Multi-transmembrane	Membrane
P54375	sodA	Superoxide dismutase [Mn] (EC 1.15.1.1) (General stress protein 24) (GSP24)		Extracellular	0	0			@Intracellular	Cytoplasmic
P27623	tagD	Glycerol-3-phosphate cytidylyltransferase (GCT) (Gro-PCT) (EC 2.7.7.39) (CDP-glycerol pyrophosphorylase) (Teichoic acid biosynthesis protein D)		Cytoplasmic	0	0			@Intracellular	Cytoplasmic
O06714	sbcC	Nuclease SbcCD subunit C		Cytoplasmic	0	0			@Intracellular	Cytoplasmic
P10725	alr1	Alanine racemase 1 (EC 5.1.1.1)		Cytoplasmic	0	0			@Intracellular	Cytoplasmic
O32257	yvbW	Uncharacterized amino acid permease YvbW	Yes	CytoplasmicMembrane	11	Y			@Multi-transmembrane	Membrane	GO:0016020|IPR002293|IPR004841|PIRSF006060|PTHR11785|PF00324
P54425	ybxG	Uncharacterized transporter YbxG	Yes	CytoplasmicMembrane	12	0			@Multi-transmembrane	Membrane	GO:0016020|GO:0016021|IPR004841|IPR004840|IPR002293|PF00324|PS00218|PTHR11785|PIRSF006060
Q45577	ybeC	Probable amino acid-proton symporter YbeC	Yes	CytoplasmicMembrane	14	0			@Multi-transmembrane	Membrane	GO:0016020|IPR002293|PIRSF006060|PTHR11785|PF13520
P37585	murG	UDP-N-acetylglucosamine--N-acetylmuramyl-(pentapeptide) pyrophosphoryl-undecaprenol N-acetylglucosamine transferase (EC 2.4.1.227) (Undecaprenyl-PP-MurNAc-pentapeptide-UDPGlcNAc GlcNAc transferase)	Yes	CytoplasmicMembrane	0	0			@Intracellular	Cytoplasmic
P24013	ctaF	Cytochrome c oxidase subunit 4B (EC 1.9.3.1) (Caa-3605 subunit 4B) (Cytochrome aa3 subunit 4B) (Cytochrome c oxidase polypeptide IVB)	Yes	CytoplasmicMembrane	3	0			@Multi-transmembrane	Membrane	GO:0016021|IPR005171|PF03626
O34586	ylbC	Uncharacterized membrane protein YlbC	Yes	Unknown	1	0			@N-terminally anchored (No CS)	Membrane
P54531	yqiT	Leucine dehydrogenase (LeuDH) (EC 1.4.1.9)		Cytoplasmic	0	0			@Intracellular	Cytoplasmic
P25811	mnmE	tRNA modification GTPase MnmE (EC 3.6.-.-)		Cytoplasmic	0	0			@Intracellular	Cytoplasmic
P39137	rocE	Amino-acid permease RocE	Yes	CytoplasmicMembrane	12	0			@Multi-transmembrane	Membrane	GO:0016021|GO:0016020|IPR004840|IPR004841|IPR002293|PS00218|PF00324|PIRSF006060|PTHR11785
P42974	ahpF	NADH dehydrogenase (EC 1.6.99.3) (Alkyl hydroperoxide reductase)	Yes	CytoplasmicMembrane	0	0			@Intracellular	Cytoplasmic
O05250	malK	Sensor histidine kinase MalK (EC 2.7.13.3) (Malate kinase sensor)	Yes	CytoplasmicMembrane	2	0			@Multi-transmembrane	Membrane	GO:0016020|IPR003661|G3DSA:1.10.287.130
P12045	purK	N5-carboxyaminoimidazole ribonucleotide synthase (N5-CAIR synthase) (EC 6.3.4.18) (5-(carboxyamino)imidazole ribonucleotide synthetase)	Yes	CytoplasmicMembrane	0	0			@Intracellular	Cytoplasmic
P94474	yeaC	Uncharacterized protein YeaC		Cytoplasmic	0	0			@Intracellular	Cytoplasmic
P37455	ssbA	Single-stranded DNA-binding protein A (SSB A)		Cytoplasmic	0	0			@Intracellular	Cytoplasmic
P37529	dck	Deoxyadenosine/deoxycytidine kinase (dAK/dCK) (EC 2.7.1.74) (EC 2.7.1.76)		Cytoplasmic	0	0			@Intracellular	Cytoplasmic
O32003	yokD	SPBc2 prophage-derived aminoglycoside N(3')-acetyltransferase-like protein YokD (EC 2.3.1.-)		Unknown	0	0			@Intracellular	Cytoplasmic
Q07833	wapA	tRNA nuclease WapA (EC 3.1.-.-) (Cell wall-associated polypeptide CWBP200) (CWBP200) (RNase WapA) (Toxin WapA) (Wall-associated protein)	Yes	Cellwall	0	Y	3		@Secretory(released) (with CS)	Extracellular	PD039135
O32212	nhaK	Sodium, potassium, lithium and rubidium/H(+) antiporter	Yes	CytoplasmicMembrane	11	Y			@Multi-transmembrane	Membrane	GO:0016021|IPR004705|IPR018422|IPR006153|TIGR00831|PTHR10110|PF00999
O35044	bceS	Sensor protein BceS (EC 2.7.13.3)	Yes	CytoplasmicMembrane	2	0			@Multi-transmembrane	Membrane
P71040	clsA	Major cardiolipin synthase ClsA (CL synthase 2) (EC 2.7.8.-)	Yes	CytoplasmicMembrane	2	0			@Multi-transmembrane	Membrane
O31534	hmoA	Heme-degrading monooxygenase HmoA (EC 1.14.99.3) (Heme oxygenase)		Cytoplasmic	0	0			@Intracellular	Cytoplasmic
P42956	mtlA	PTS system mannitol-specific EIICB component (EIICB-Mtl) (EII-Mtl) [Includes: Mannitol permease IIC component (PTS system mannitol-specific EIIC component); Mannitol-specific phosphotransferase enzyme IIB component (EC 2.7.1.69) (PTS system mannitol-specific EIIB component)]	Yes	CytoplasmicMembrane	9	0			@Multi-transmembrane	Membrane	GO:0016020|GO:0016021|IPR003352|IPR004718|PF02378|TIGR00851
O32005	yokB	SPBc2 prophage-derived uncharacterized lipoprotein YokB	Yes	Unknown	0	Y			@Lipid anchored	Extracellular	PS51257
O31823	yngC	Uncharacterized membrane protein YngC	Yes	CytoplasmicMembrane	5	0			@Multi-transmembrane	Membrane
P14949	trxA	Thioredoxin (Trx)		Cytoplasmic	0	0			@Intracellular	Cytoplasmic
P06224	sigA	RNA polymerase sigma factor SigA (Sigma-43) (Sigma-A)		Cytoplasmic	0	0			@Intracellular	Cytoplasmic
P12874	rpsQ	30S ribosomal protein S17 (BS16)		Cytoplasmic	0	0			@Intracellular	Cytoplasmic
P39580	dltB	Protein DltB	Yes	CytoplasmicMembrane	12	0			@Multi-transmembrane	Membrane	IPR004299|PF03062
O34314	ytlC	Uncharacterized ABC transporter ATP-binding protein YtlC (EC 3.6.3.-)	Yes	CytoplasmicMembrane	0	0			@Intracellular	Cytoplasmic
C0SP89	yoaH	Putative methyl-accepting chemotaxis protein YoaH	Yes	CytoplasmicMembrane	2	0			@Multi-transmembrane	Membrane	GO:0016020|GO:0016021|IPR004089|IPR003660|IPR004090|PF00015|PF00672|PR00260|SM00283|PS50111|SM00304|PS50885
P94414	yclK	Sensor histidine kinase YclK (EC 2.7.13.3)	Yes	CytoplasmicMembrane	2	0			@Multi-transmembrane	Membrane	GO:0016020|GO:0016021|IPR003661|IPR003660|G3DSA:1.10.287.130|SM00304|PF00512|PF00672|PS50885|SM00388
O32217	bdbC	Disulfide bond formation protein C (Disulfide oxidoreductase C) (Thiol-disulfide oxidoreductase C)	Yes	CytoplasmicMembrane	4	0			@Multi-transmembrane	Membrane	GO:0016020|IPR003752|PF02600
P37464	serS	Serine--tRNA ligase (EC 6.1.1.11) (Seryl-tRNA synthetase) (SerRS) (Seryl-tRNA(Ser/Sec) synthetase)		Cytoplasmic	0	0			@Intracellular	Cytoplasmic
Q01960	flhF	Flagellar biosynthesis protein FlhF (Flagella-associated GTP-binding protein)	Yes	CytoplasmicMembrane	0	0			@Intracellular	Cytoplasmic	GO:0005886|IPR020006|TIGR03499
P71082	ygaD	Putative multidrug export ATP-binding/permease protein YgaD (EC 3.6.3.-)	Yes	CytoplasmicMembrane	5	0			@Multi-transmembrane	Membrane	GO:0016021|IPR011527|PF00664|SSF90123|PS50929
Q45601	rlmH	Ribosomal RNA large subunit methyltransferase H (EC 2.1.1.177) (23S rRNA (pseudouridine1915-N3)-methyltransferase) (23S rRNA m3Psi1915 methyltransferase) (rRNA (pseudouridine-N3-)-methyltransferase RlmH)		Cytoplasmic	0	0			@Intracellular	Cytoplasmic
P40405	swrB	Swarming motility protein SwrB	Yes	CytoplasmicMembrane	1	0			@N-terminally anchored (No CS)	Membrane
P13484	tagE	Probable poly(glycerol-phosphate) alpha-glucosyltransferase (EC 2.4.1.52) (Major teichoic acid biosynthesis protein E)		Unknown	0	0			@Intracellular	Cytoplasmic
P32081	cspB	Cold shock protein CspB (Major cold shock protein)		Cytoplasmic	0	0			@Intracellular	Cytoplasmic
P39604	rodA	Rod shape-determining protein RodA	Yes	CytoplasmicMembrane	10	0			@Multi-transmembrane	Membrane	GO:0016021|IPR018365|IPR001182|PS00428|PF01098|PTHR30474
P21468	rpsF	30S ribosomal protein S6 (BS9)		Cytoplasmic	0	0			@Intracellular	Cytoplasmic
O06979	yvcQ	Sensor histidine kinase YvcQ (EC 2.7.13.3)	Yes	CytoplasmicMembrane	2	0			@Multi-transmembrane	Membrane
P18158	glpD	Aerobic glycerol-3-phosphate dehydrogenase (EC 1.1.5.3)		Cytoplasmic	0	0			@Intracellular	Cytoplasmic
P54493	gluP	Rhomboid protease GluP (EC 3.4.21.105) (Intramembrane serine protease)	Yes	CytoplasmicMembrane	7	0			@Multi-transmembrane	Membrane	GO:0016021|IPR022764|IPR002610|G3DSA:1.20.1540.10|PF01694|PTHR22936
Q45588	rsiW	Anti-sigma-W factor RsiW (Regulator of SigW) (Sigma-W anti-sigma factor RsiW)	Yes	Cytoplasmic	1	0			@Intracellular /TMH start AFTER 60	Cytoplasmic
P40872	pksM	Polyketide synthase PksM	Yes	CytoplasmicMembrane	1	0			@Intracellular	Cytoplasmic
Q797S1	ybbF	Putative PTS system EIIBC component YbbF [Includes: Phosphotransferase enzyme IIB component (EC 2.7.1.69) (PTS system EIIB component); Permease IIC component (PTS system EIIC component)]	Yes	CytoplasmicMembrane	9	0			@Multi-transmembrane	Membrane	GO:0016020|IPR003352|PF02378
O31671	kinD	Sporulation kinase D (EC 2.7.13.3) (Sensor histidine kinase D)	Yes	CytoplasmicMembrane	2	0			@Multi-transmembrane	Membrane	GO:0016020|IPR003661|SM00388|PF00512|G3DSA:1.10.287.130
O34705	ytpA	Phospholipase YtpA (EC 3.1.1.-) (Bacilysocin biosynthesis protein YtpA)	Yes	CytoplasmicMembrane	0	0			@Intracellular	Cytoplasmic
P46343	phoH	PhoH-like protein		Cytoplasmic	0	0			@Intracellular	Cytoplasmic
O31655	rsgI	Anti-sigma-I factor RsgI (Regulation of sigma I protein)	Yes	Cytoplasmic	1	0			@Intracellular /TMH start AFTER 60	Cytoplasmic
O31580	yfhL	Uncharacterized protein YfhL	Yes	CytoplasmicMembrane	3	0			@Multi-transmembrane	Membrane
P94422	ycnB	Uncharacterized MFS-type transporter YcnB	Yes	CytoplasmicMembrane	14	0			@Multi-transmembrane	Membrane	GO:0016021|IPR004638|IPR011701|TIGR00711|PF07690
O05523	tatC2	Sec-independent protein translocase protein TatCy	Yes	CytoplasmicMembrane	6	0			@Multi-transmembrane	Membrane	GO:0016021|IPR002033|TIGR00945|PR01840|MF_00902|PF00902|PTHR30371:SF0
O31688	zosA	Zinc-transporting ATPase (EC 3.6.3.-) (Zn(2+)-translocating P-type ATPase)	Yes	CytoplasmicMembrane	8	0			@Multi-transmembrane	Membrane	GO:0016021|IPR001757|IPR027256|PR00119|PR00941|TIGR01494|TIGR01525
Q795M6	yugH	Putative aminotransferase YugH (EC 2.6.1.-)		Cytoplasmic	0	0			@Intracellular	Cytoplasmic
P20458	infA	Translation initiation factor IF-1		Cytoplasmic	0	0			@Intracellular	Cytoplasmic
O32219	cadA	Cadmium, zinc and cobalt-transporting ATPase (EC 3.6.3.3) (EC 3.6.3.5)	Yes	CytoplasmicMembrane	8	0			@Multi-transmembrane	Membrane	GO:0016021|IPR027256|IPR001757|PR00941|TIGR01525|TIGR01494|PR00119
C0H423	yozV	Uncharacterized membrane protein YozV	Yes	CytoplasmicMembrane	1	Y			@Multi-transmembrane	Membrane
P32397	hemY	Protoporphyrinogen oxidase (PPO) (EC 1.3.3.4)	Yes	CytoplasmicMembrane	1	0			@N-terminally anchored (No CS)	Membrane
P96600	dctB	C4-dicarboxylate-binding protein DctB	Yes	Unknown	0	Y			@N-terminally anchored (No CS)	Membrane	GO:0030288|IPR004682|IPR018389|TIGR00787|PIRSF006470|PF03480
P23448	fliG	Flagellar motor switch protein FliG		Cytoplasmic	0	Y			@Intracellular	Cytoplasmic
O05525	ydiL	Putative membrane peptidase YdiL (EC 3.4.-.-)	Yes	CytoplasmicMembrane	7	0			@Multi-transmembrane	Membrane	GO:0016020|IPR003675|PF02517
O31796	hfq	RNA-binding protein Hfq		Cytoplasmic	0	0			@Intracellular	Cytoplasmic
P96652	lrpA	HTH-type transcriptional regulator LrpA		Unknown	0	0			@Intracellular	Cytoplasmic
P94592	ywpJ	Putative phosphatase YwpJ (EC 3.1.3.-)		Cytoplasmic	0	0			@Intracellular	Cytoplasmic
Q7WY60	mrpE	Na(+)/H(+) antiporter subunit E (Mrp complex subunit E) (Multiple resistance and pH homeostasis protein E)	Yes	CytoplasmicMembrane	1	Y			@Multi-transmembrane	Membrane	GO:0016021|IPR002758|PIRSF019239|PF01899
O34697	bceA	Bacitracin export ATP-binding protein BceA	Yes	CytoplasmicMembrane	0	0			@Intracellular	Cytoplasmic
Q04797	asd	Aspartate-semialdehyde dehydrogenase (ASA dehydrogenase) (ASADH) (EC 1.2.1.11) (Aspartate-beta-semialdehyde dehydrogenase)		Cytoplasmic	0	Y			@Intracellular	Cytoplasmic
O06753	yitR	Uncharacterized protein YitR	Yes	CytoplasmicMembrane	3	0			@Multi-transmembrane	Membrane
O31829	yoaF	Uncharacterized protein YoaF		Unknown	0	Y			@Intracellular	Cytoplasmic
O06481	yfnC	Uncharacterized MFS-type transporter YfnC	Yes	CytoplasmicMembrane	11	0			@Multi-transmembrane	Membrane	GO:0016021|IPR011701|PF07690
P46324	yvrN	Uncharacterized ABC transporter permease YvrN	Yes	CytoplasmicMembrane	4	0			@Multi-transmembrane	Membrane	GO:0016020|IPR003838|PF02687
O31461	ilvE	Branched-chain-amino-acid transaminase 1 (BCAT 1) (EC 2.6.1.42)		Unknown	0	0			@Intracellular	Cytoplasmic
P55189	ybaR	Putative sulfate transporter YbaR	Yes	CytoplasmicMembrane	12	0			@Multi-transmembrane	Membrane	GO:0016020|GO:0016021|IPR001902|IPR011547|TIGR00815|PF00916|PTHR11814
O31724	ylmB	N-formyl-4-amino-5-aminomethyl-2-methylpyrimidine deformylase (EC 3.5.1.-) (Amidohydrolase) (Formylaminopyrimidine deformylase)		Cytoplasmic	0	0			@Intracellular	Cytoplasmic
O34753	tagO	Probable undecaprenyl-phosphate N-acetylglucosaminyl 1-phosphate transferase (EC 2.7.8.33) (UDP-GlcNAc:undecaprenyl-phosphate GlcNAc-1-phosphate transferase) (Undecaprenyl-Phosphate GlcNAc-1-phosphate transferase)	Yes	CytoplasmicMembrane	11	0			@Multi-transmembrane	Membrane	GO:0016021|IPR000715|PTHR22926|PF00953
P52035	bsaA	Glutathione peroxidase homolog BsaA (EC 1.-.-.-)		Cytoplasmic	0	0			@Intracellular	Cytoplasmic
O06724	yisK	Uncharacterized protein YisK		Cytoplasmic	0	0			@Intracellular	Cytoplasmic
O31797	ymzC	Uncharacterized protein YmzC	Yes	Unknown	0	Y			@N-terminally anchored (No CS)	Membrane
O32182	yusP	Uncharacterized MFS-type transporter YusP	Yes	CytoplasmicMembrane	13	Y			@Multi-transmembrane	Membrane	GO:0016021|IPR005829|IPR011701|IPR004638|PS00216|PF07690|TIGR00711
P45859	prpD	2-methylcitrate dehydratase (EC 4.2.1.79)		Cytoplasmic	0	0			@Intracellular	Cytoplasmic
O34707	ytpB	Tetraprenyl-beta-curcumene synthase (EC 4.2.3.130)		Cytoplasmic	0	0			@Intracellular	Cytoplasmic
O05522	tatAy	Sec-independent protein translocase protein TatAy	Yes	CytoplasmicMembrane	1	0			@N-terminally anchored (No CS)	Membrane	GO:0005886|GO:0016021|IPR006312|MF_00236|TIGR01411
O34977	ythP	Uncharacterized ABC transporter ATP-binding protein YthP (EC 3.6.3.-)	Yes	CytoplasmicMembrane	0	0			@Intracellular	Cytoplasmic
O31689	ykvY	Putative dipeptidase YkvY (EC 3.4.13.-)		Cytoplasmic	0	0			@Intracellular	Cytoplasmic
O34934	ppnK2	Probable inorganic polyphosphate/ATP-NAD kinase 2 (Poly(P)/ATP NAD kinase 2) (EC 2.7.1.23)		Cytoplasmic	0	0			@Intracellular	Cytoplasmic
P37958	mecA	Adapter protein MecA 1		Cytoplasmic	0	0			@Intracellular	Cytoplasmic
O31570	yfhB	Uncharacterized isomerase YfhB (EC 5.1.-.-)		Cytoplasmic	0	0			@Intracellular	Cytoplasmic
P37941	bfmBAB	2-oxoisovalerate dehydrogenase subunit beta (EC 1.2.4.4) (Branched-chain alpha-keto acid dehydrogenase E1 component beta chain) (BCKDH E1-beta)		Cytoplasmic	0	0			@Intracellular	Cytoplasmic
O34638	ykoH	Sensor histidine kinase YkoH (EC 2.7.13.3)	Yes	CytoplasmicMembrane	2	0			@Multi-transmembrane	Membrane	GO:0016021|GO:0016020|IPR003660|IPR003661|PS50885|SM00304|PF00512|SM00388|G3DSA:1.10.287.130|PF00672
P12667	nucA	DNA-entry nuclease (EC 3.-.-.-) (Competence-specific nuclease)	Yes	CytoplasmicMembrane	1	0			@N-terminally anchored (No CS)	Membrane
Q02886	dinB	Protein DinB		Unknown	0	0			@Intracellular	Cytoplasmic
P71038	ywnC	Uncharacterized protein YwnC	Yes	CytoplasmicMembrane	2	0			@Multi-transmembrane	Membrane	PD031895
O31928	yopJ	SPBc2 prophage-derived uncharacterized protein YopJ		Cytoplasmic	0	0			@Intracellular	Cytoplasmic
P54514	yqhP	Uncharacterized protein YqhP	Yes	CytoplasmicMembrane	2	0			@Multi-transmembrane	Membrane
O32065	ytzB	Uncharacterized protein YtzB		Unknown	0	Y			@Intracellular	Cytoplasmic
P24500	flgB	Flagellar basal body rod protein FlgB		Unknown	0	0			@Intracellular	Cytoplasmic
P54417	opuD	Glycine betaine transporter OpuD	Yes	CytoplasmicMembrane	12	0			@Multi-transmembrane	Membrane	GO:0016020|IPR000060|IPR018093|PF02028|PS01303|TIGR00842
P70947	yitU	Putative phosphatase YitU (EC 3.1.3.-)		Cytoplasmic	0	0			@Intracellular	Cytoplasmic
P94571	bcrC	Undecaprenyl-diphosphatase BcrC (EC 3.6.1.27) (Undecaprenyl pyrophosphate phosphatase)	Yes	CytoplasmicMembrane	5	0			@Multi-transmembrane	Membrane	GO:0016020|IPR000326|G3DSA:1.20.144.10|SM00014|PF01569|SSF48317
C0H402	ykzP	Uncharacterized protein YkzP		Unknown	0	0			@Intracellular	Cytoplasmic
O05227	mrpG	Na(+)/H(+) antiporter subunit G (Mrp complex subunit G) (Multiple resistance and pH homeostasis protein G)	Yes	CytoplasmicMembrane	3	0			@Multi-transmembrane	Membrane
O31976	yomI	SPBc2 prophage-derived uncharacterized transglycosylase YomI (EC 4.2.2.-)	Yes	Extracellular	2	0			@Intracellular	Cytoplasmic	GO:0016020|IPR000189|PS00922
P42248	ycbP	Uncharacterized protein YcbP (ORF15)	Yes	CytoplasmicMembrane	4	0			@Multi-transmembrane	Membrane
C0H440	youA	SPBc2 prophage-derived uncharacterized protein YouA		Unknown	0	0			@Intracellular	Cytoplasmic
P97029	ygaO	Uncharacterized lipoprotein YgaO	Yes	CytoplasmicMembrane	3	Y			@Multi-transmembrane	Membrane	PS51257
O32201	liaH	Protein LiaH	Yes	CytoplasmicMembrane	0	0			@Intracellular	Cytoplasmic
Q796Y5	ygaK	Uncharacterized FAD-linked oxidoreductase YgaK (EC 1.-.-.-)		Cytoplasmic	0	0			@Intracellular	Cytoplasmic
